# Supplementary material for: Assessment of Discrepancies Between Follow-up Infarct Volume and 90-Day Outcomes Among Patients With Ischemic Stroke Who Received Endovascular Therapy
Source: PubMed Central journal article supplement (PMC8571657; doi:10.1001/jamanetworkopen.2021.32376), 2021-11-05
Supplement: jamanetwopen-e2132376-s001.pdf [file jamanetwopen-e2132376-s001.pdf]

## Supplemental Online Content

Ganesh A, Ospel JM, Menon BK, et al; ESCAPE-NA1 Trial Investigators. Assessment of discrepancies between follow-up infarct volume and 90-day outcomes among patients with ischemic stroke who received endovascular therapy. *JAMA Netw Open*. 2021;4(11):e2132376. doi:10.1001/jamanetworkopen.2021.32376

**eTable 1.** Baseline Characteristics of Participants in the Trial Who Had Both FIV and 90-Day mRS Data

**eTable 2.** Patients With Discrepancies Between FIV and Functional Outcomes per the Modified Rankin Scale (mRS) at 90 Days, Using Different Definitions of Small and Large FIV and Favorable and Unfavorable Outcome

**eTable 3.** Univariate Comparison of Imaging Modality and 90-Day Outcomes in Discrepant vs Nondiscrepant Cases

**eTable 4.** Univariate Comparison of Pretreatment Factors Discrepant vs Nondiscrepant Cases

**eTable 5.** Comparison of Treatment-Related and Posttreatment Factors, Including Serious Adverse Events (SAEs), in Discrepant vs Nondiscrepant Cases

**eTable 6.** Comparison of Prespecified and Stepwise Multivariable Logistic Regression Models for the Association of Pretreatment Variables Among 1091 Patients and Treatment-Related or Posttreatment Variables Among 1086 Patients in Prespecified Model and 631 Patients in Stepwise Model for the Outcome of mRS Score of 3 or Greater Despite FIV of 7 mL or Less in the ESCAPE-NA1 Trial

**eTable 7.** Comparison of Prespecified and Stepwise Multivariable Logistic Regression Models for the Association of Pretreatment Variables Among 1094 Patients and Treatment-Related or Posttreatment Variables Among 1089 Patients for the Outcome of mRS Score of 4 or Greater Despite FIV of 7 mL or Less in the ESCAPE-NA1 Trial

**eTable 8.** Comparison of Prespecified and Stepwise Multivariable Logistic Regression Models for the Association of Treatment-Related or Posttreatment Variables Among 918 Patients for the Outcome of mRS Score of 3 or Greater Despite FIV of 7 mL or Less in the ESCAPE-NA1 Trial With 24-Hour or 48-hour NIHSS Included as a Posttreatment Variable

**eTable 9.** Comparison of Prespecified and Stepwise Multivariable Logistic Regression Models for the Association of Pretreatment Variables Among 254 Patients and Treatment-Related or Posttreatment Variables Among 256 Patients for Outcome of mRS Score of 4 or Greater Despite FIV of 7 mL or Less in the ESCAPE-NA1 Trial, Restricted to Patients With MRI for FIV Determination

**eTable 10.** Comparison of Prespecified and Stepwise Multivariable Logistic Regression Models for the Association of Pretreatment Variables Among 1091 Patients and Treatment-Related or Posttreatment Variables Among 1082 Patients for the Outcome of mRS Score of 2 or Less Despite FIV of 92 mL or Greater in the ESCAPE-NA1 Trial

**eTable 11.** Comparison of Prespecified and Stepwise Multivariable Logistic Regression Models for the Association of Pretreatment Variables Among 1091 Patients and Treatment-Related or

Posttreatment Variables Among 1082 Patients for the Outcome of mRS Score of 3 or Less Despite FIV of 92 mL or Greater in the ESCAPE-NA1 Trial

**eTable 12.** Comparison of Prespecified and Stepwise Multivariable Logistic Regression Models for the Association Treatment-Related or Posttreatment Variables Among 924 Patients for the Outcome of mRS Score of 2 or Less Despite FIV of 92 mL or Greater in the ESCAPE-NA1 Trial With 24-Hour or 48-hour NIHSS Included as a Posttreatment Variable

**eFigure 1.** Proportions of Patients in the ESCAPE-NA1 Trial With Discrepancies Between FIV and 90-day mRS Score, Based on the Definitions Used in this Study

**eFigure 2.** Proportion of Patients in Each Age Group With 90-Day mRS Score of 3 or Greater Despite Small FIV and mRS Score of 2 or Less Despite Large FIV

This supplemental material has been provided by the authors to give readers additional information about their work.

**eTable 1. Baseline Characteristics of Participants in the Trial Who Had Both FIV and 90-Day mRS Data**

|                                                                                |                  |
|--------------------------------------------------------------------------------|------------------|
| Age, Median years (IQR)                                                        | 70.9 (60.7-79.8) |
| Sex – female, N (%)                                                            | 549 (49.7%)      |
| Race                                                                           |                  |
| White, N (%)                                                                   | 881 (80.8)       |
| Asian, N (%)                                                                   | 105 (9.6)        |
| <b>Medical history</b>                                                         |                  |
| Hypertension, N (%)                                                            | 764 (70.0)       |
| Non-smoker (lifelong), N (%)                                                   | 559 (51.4)       |
| Hyperlipidemia, N (%)                                                          | 506 (46.4)       |
| Atrial fibrillation, N (%)                                                     | 385 (35.3)       |
| Ischemic heart disease, N (%)                                                  | 250 (22.9)       |
| Diabetes, N (%)                                                                | 215 (19.7)       |
| Congestive heart failure, N (%)                                                | 135 (12.4)       |
| Any past stroke, N (%)                                                         | 155 (14.2)       |
| Peripheral vascular disease, N (%)                                             | 58 (5.3)         |
| Chronic renal failure, N (%)                                                   | 63 (5.8)         |
| Recent major surgery, N (%)                                                    | 39 (3.6)         |
| <b>Clinical factors</b>                                                        |                  |
| Witnessed stroke onset, N (%)                                                  | 624 (57.4)       |
| Stroke on awakening, N (%)                                                     | 171 (15.7)       |
| Right hemisphere stroke, N (%)                                                 | 575 (52.7)       |
| NIHSS score, median (IQR)                                                      | 17 (12-21)       |
| Systolic blood pressure (mmHg), median (IQR)                                   | 146 (130-165)    |
| Blood glucose (mmol/L), median (IQR)                                           | 6.7 (5.9-7.9)    |
| ASPECTS, median (IQR)                                                          | 8 (7-9)          |
| Occlusion site – ICA, N (%)                                                    | 211 (19.3)       |
| Collaterals – good, N (%)                                                      | 699 (64.1)       |
| <b>Treatment and workflow</b>                                                  |                  |
| Nerinetide treatment, N (%)                                                    | 544 (49.9)       |
| Alteplase treatment, N (%)                                                     | 653 (59.9)       |
| Interhospital transfer to endovascular center, N (%)                           | 456 (41.8)       |
| General anesthesia use, N (%)                                                  | 187 (17.2)       |
| Onset to randomization (min), median (IQR)                                     | 187 (121-309)    |
| Endovascular center arrival to arterial access or puncture (min), median (IQR) | 59 (42-84)       |
| Study drug start to reperfusion (min), median (IQR)                            | 22 (8-41)        |
| eTICI (expanded Thrombolysis in Cerebral Ischemia)                             |                  |
| 2b-2c-3, N (%)                                                                 | 947 (87.3)       |
| 2c-3, N (%)                                                                    | 504 (46.5)       |

**eTable 2. Patients With Discrepancies Between FIV and Functional Outcomes per the Modified Rankin Scale (mRS) at 90 Days, Using Different Definitions of Small and Large FIV and Favorable and Unfavorable Outcome**

| Definition of small/large FIV                                         | Definition of favourable/unfavourable outcome at 90-days |                                          |
|-----------------------------------------------------------------------|----------------------------------------------------------|------------------------------------------|
|                                                                       | Favourable: mRS≤2<br>Unfavourable: mRS≥3                 | Favourable: mRS≤3<br>Unfavourable: mRS≥4 |
| <b>SET 1</b>                                                          |                                                          |                                          |
| FIV≤7mL (25 <sup>th</sup> percentile) and unfavourable outcome, N(%)  | 42/287 (14.6)                                            | 23/287 (8.0)                             |
| FIV≥92mL (75 <sup>th</sup> percentile) and favourable outcome, N(%)   | 65/275 (23.6)                                            | 106/275 (38.6)                           |
| <b>Total “discrepant cases” in the cohort, N(%)</b>                   | 107/1,091 (9.8)                                          | 129/1,091 (11.8)                         |
| <b>SET 2</b>                                                          |                                                          |                                          |
| FIV≤1mL (10 <sup>th</sup> percentile) and unfavourable outcome, N(%)  | 24/103 (23.3)                                            | 8/103 (7.8)                              |
| FIV≥215mL, (90 <sup>th</sup> percentile) and favourable outcome, N(%) | 10/109 (9.2)                                             | 18/109 (16.5)                            |
| <b>Total “discrepant cases” in the cohort, N(%)</b>                   | 34/1,091 (3.1)                                           | 26/1,091 (2.4)                           |

**Using the most inclusive definitions (FIV≤7mL/mRS≥3 or FIV≥92/mRS≤3), discrepant outcomes occurred in 148/1,091 (13.6%) of the cohort.**

**eTable 3. Univariate Comparison of Imaging Modality and 90-Day Outcomes in Discrepant vs Nondiscrepant Cases**

Patients with small follow-up infarct volume or FIV (defined as FIV≤7mL) and poor outcome (defined as 90-day mRS≥3) considered discrepant; patients with small FIV and good outcome (mRS≤2) considered nondiscrepant; patients with large FIV (defined as FIV≥92mL) and good outcome (defined as mRS≤2) considered discrepant; patients with large FIV and bad outcome considered nondiscrepant. Variables significant at p<0.05 are bolded; those also significant with the Hochberg correction (p<0.0013) are indicated with asterisk (\*).

| Variable                         | (A) FIV≤7mL      |                  |                    | (B) FIV≥92mL     |                  |                    |
|----------------------------------|------------------|------------------|--------------------|------------------|------------------|--------------------|
|                                  | Discrepant       | Non-discrepant   | P-value            | Discrepant       | Non-discrepant   | P-value            |
| MRI vs CT for FIV(%)             | 7/41 (17.1)      | 87/245 (35.5)    | <b>0.020</b>       | 21/65 (32.3)     | 56/216 (25.9)    | 0.34               |
| Barthel Index/BI (mean, 95%CI)   | 68.6 (58.5-78.7) | 99.1 (98.7-99.4) | <b>&lt;0.0001*</b> | 97.2 (95.7-98.6) | 45.7 (39.7-51.6) | <b>&lt;0.0001*</b> |
| - BI<95 (%)                      | 22/33 (66.7)     | 7/243 (2.9)      | <b>&lt;0.001*</b>  | 10/65 (15.4)     | 111/122 (91.0)   | <b>&lt;0.001*</b>  |
| Discharge location: not home (%) | 31/40 (77.5)     | 82/245 (33.5)    | <b>&lt;0.001*</b>  | 44/65 (67.7)     | 210/214 (98.1)   | <b>&lt;0.001*</b>  |
| 90-day residence: not home (%)   | 25/41 (61.0)     | 13/245 (5.3)     | <b>&lt;0.001*</b>  | 9/65 (13.9)      | 170/215 (79.1)   | <b>&lt;0.001*</b>  |
| Hospital LOS (mean days, 95%CI)  | 23.3 (17.4-29.1) | 9.8 (8.2-11.4)   | <b>&lt;0.0001*</b> | 26.1 (22.5-29.7) | 22.6 (17.5-27.8) | 0.91               |

**eTable 4. Univariate Comparison of Pretreatment Factors Discrepant vs Nondiscrepant Cases**

Patients with small follow-up infarct volume or FIV (defined as FIV≤7mL) and poor outcome (defined as 90-day mRS≥3) considered discrepant; patients with small FIV and good outcome (mRS≤2) considered nondiscrepant; patients with large FIV (defined as FIV≥92mL) and good outcome (defined as mRS≤2) considered discrepant; patients with large FIV and bad outcome considered nondiscrepant. Variables significant at p<0.05 are bolded; those also significant with Hochberg correction (p<0.0013) are indicated with asterisk (\*).

| Variable                                                                     | (A) FIV≤7mL         |                      |                    | (B) FIV≥92mL               |                            |                |
|------------------------------------------------------------------------------|---------------------|----------------------|--------------------|----------------------------|----------------------------|----------------|
|                                                                              | Discrepant          | Non-discrepant       | P-value            | Discrepant                 | Non-discrepant             | P-value        |
| <b>Demographics, Co-morbidities, and Pre-Treatment Laboratory Parameters</b> |                     |                      |                    |                            |                            |                |
| <b>Age (Mean, 95%CI)</b>                                                     | 80.1 (76.6-83.7)    | 70.1 (68.4-71.7)     | <b>&lt;0.0001*</b> | 65.2 (62.1-68.2)           | 72.3 (70.6-74.0)           | <b>0.0001*</b> |
| Female (%)                                                                   | 22/41 (53.7)        | 133/245 (54.3)       | 1.00               | 24/65 (36.9)               | 108/216 (50.0)             | 0.067          |
| Race – Non-White (%)                                                         | 4/31 (9.8)          | 46/245 (18.8)        | 0.81               | 13/65 (20.0)               | 59/216 (27.3)              | 0.86           |
| <b>Cancer (%)</b>                                                            | 2/41 (4.9)          | 0/245                | <b>0.020</b>       | 1/65 (1.5)                 | 1/216 (0.5)                | 0.41           |
| <b>Coronary artery disease (%)</b>                                           | 16/41 (39.0)        | 49/245 (20.0)        | <b>0.014</b>       | 17/65 (26.2)               | 53/215 (24.7)              | 0.87           |
| Congestive heart failure (%)                                                 | 9/41 (22.0)         | 35/245 (14.3)        | 0.24               | 6/65 (9.2)                 | 23/215 (10.7)              | 0.82           |
| Stroke or TIA (%)                                                            | 10/41 (24.4)        | 37/245 (15.1)        | 0.17               | 7/65 (10.8)                | 31/215 (14.4)              | 0.54           |
| <b>Stroke or TIA in last 90-days (%)</b>                                     | 1/41 (2.4)          | 11/245 (4.5)         | 1.00               | 6/65 (9.2)                 | 4/215 (1.9)                | <b>0.012</b>   |
| Intracerebral hemorrhage(%)                                                  | 2/41 (4.9)          | 3/245 (1.2)          | 0.15               | 0/65                       | 4/215 (1.9)                | 0.58           |
| Peripheral vascular disease (%)                                              | 4/41 (9.8)          | 10/245 (4.1)         | 0.12               | 5/65 (7.7)                 | 17/215 (7.9)               | 1.00           |
| Chronic renal failure                                                        | 5/41 (12.2)         | 13/245 (5.3)         | 0.15               | 5/65 (7.7)                 | 20/215 (9.3)               | 0.81           |
| Dyslipidemia (%)                                                             | 26/41 (63.4)        | 115/245 (46.9)       | 0.063              | 23/65 (35.4)               | 106/215 (49.3)             | 0.064          |
| <b>Atrial Fibrillation (%)</b>                                               | <b>25/41 (61.0)</b> | <b>98/245 (40.0)</b> | <b>0.016</b>       | 20/65 (30.8)               | 77/215 (35.8)              | 0.55           |
| Hypertension (%)                                                             | 34/41 (82.9)        | 179/245 (73.1)       | 0.25               | 43/65 (66.2)               | 160/215 (74.4)             | 0.21           |
| <b>Diabetes (%)</b>                                                          | 9/41 (22.0)         | 44/245 (18.0)        | 0.52               | <b>7/65 (10.8)</b>         | <b>62/215 (28.8)</b>       | <b>0.003</b>   |
| Smoking – Current/Ex (%)                                                     | 18/41 (43.9)        | 113/245 (46.1)       | 0.87               | 37/65 (56.9)               | 91/212 (42.9)              | 0.064          |
| Any vascular risk factors (%)                                                | 40/41 (97.6)        | 227/245 (92.7)       | 0.33               | 61/65 (93.9)               | 200/216 (92.6)             | 1.00           |
| <b>Number of vascular risk factors (median, IQR)</b>                         | <b>4 (2-5)</b>      | <b>3 (2-4)</b>       | <b>0.0043</b>      | 2 (1-4)                    | 3 (2-4)                    | 0.18           |
| Head trauma in last 90-days (%)                                              | 0/41                | 3/245 (1.2)          | 1.00               | 0/65                       | 3/215 (1.4)                | 1.00           |
| Major surgery in last 90-days (%)                                            | 1/41 (2.4)          | 11/245 (4.5)         | 1.00               | 3/65 (4.6)                 | 8/215 (3.7)                | 0.72           |
| Endocarditis (%)                                                             | 1/41 (2.4)          | 0                    | 0.14               | 1/65 (1.5)                 | 1/216 (0.5)                | 0.41           |
| Intracardiac thrombus                                                        | 0/41                | 2/245 (0.8)          | 1.00               | 0/65                       | 1/216 (0.5)                | 1.00           |
| Patent Foramen Ovale                                                         | 0/41                | 2/245 (0.8)          | 1.00               | 0                          | 0                          |                |
| <b>Pre-stroke mRS (%)</b>                                                    |                     |                      |                    |                            |                            |                |
| 0                                                                            | 25/41 (61.0)        | 206/245 (84.1)       | <b>0.0010*</b>     | 53/65 (81.5)               | 173/213 (81.2)             | 0.086          |
| 1                                                                            | 9/41 (22.0)         | 28/245 (11.4)        |                    | 11/65 (16.9)               | 23/213 (10.8)              |                |
| 2                                                                            | 7/41 (17.1)         | 11/245 (4.5)         |                    | 1/65 (1.5)                 | 17/213 (8.0)               |                |
| <b>SBP (Mean mmHg, 95%CI)</b>                                                | 151.5 (143.7-159.3) | 146.4 (143.2-149.6)  | 0.30               | <b>146.2 (140.7-151.6)</b> | <b>153.4 (149.7-157.1)</b> | <b>0.031</b>   |

|                                                        |                            |                            |               |                            |                            |              |
|--------------------------------------------------------|----------------------------|----------------------------|---------------|----------------------------|----------------------------|--------------|
| DBP (Mean mmHg, 95%CI)                                 | 84.1 (79.4-88.9)           | 81.1 (79.1-83.0)           | 0.20          | 82.2 (78.2-86.1)           | 81.9 (79.7-84.1)           | 0.57         |
| Heart Rate (Mean bpm, 95%CI)                           | 84.0 (76.7-91.3)           | 83.0 (80.5-85.4)           | 0.81          | 84.4 (80.3-88.6)           | 83.8 (81.2-86.4)           | 0.55         |
| Temperature (Mean C, 95%CI)                            | 36.3 (36.1-36.6)           | 36.4 (36.3-36.5)           | 0.89          | 36.4 (36.2-36.5)           | 36.3 (36.2-36.5)           | 0.77         |
| <b>Hemoglobin (Mean g/L, 95%CI)</b>                    | <b>127.6 (121.4-133.8)</b> | <b>135.2 (133.0-137.3)</b> | <b>0.0027</b> | <b>140.2 (136.0-144.3)</b> | <b>133.1 (130.5-135.7)</b> | <b>0.013</b> |
| <b>Hematocrit (Mean, 95%CI)</b>                        | <b>0.39 (0.37-0.41)</b>    | <b>0.40 (0.40-0.41)</b>    | <b>0.030</b>  | 0.41 (0.40-0.43)           | 0.40 (0.39-0.41)           | 0.063        |
| Platelets – baseline (Mean x10 <sup>9</sup> /L, 95%CI) | 223.7 (200.2-247.3)        | 223.4 (215.1-231.6)        | 0.99          | 237.3 (214.7-259.9)        | 224.1 (213.6-234.5)        | 0.42         |
| Partial Thromboplastin Time (Mean seconds, 95%CI)      | 27.5 (25.4-29.6)           | 28.2 (27.2-29.2)           | 0.83          | 29.3 (27.1-31.4)           | 28.0 (27.1-28.9)           | 0.18         |
| International Normalized Ratio                         | 1.1 (1.0-1.1)              | 1.1 (1.1-1.2)              | 0.59          | 1.1 (1.0-1.1)              | 1.1 (1.1-1.2)              | 0.20         |
| <b>Glucose (Mean mmol/L, 95%CI)</b>                    | 7.2 (6.5-8.0)              | 7.0 (6.7-7.2)              | 0.56          | <b>7.5 (6.9-8.1)</b>       | <b>8.5 (8.0-9.0)</b>       | <b>0.019</b> |
| Creatinine – baseline (Mean umol/L, 95%CI)             | 94.0 (84.3-103.7)          | 86.8 (82.9-90.7)           | 0.068         | 84.7 (77.9-91.4)           | 89.8 (85.2-94.4)           | 0.38         |
| <b>Glomerular Filtration Rate (Mean, 95%CI)</b>        | <b>63.5 (56.8-70.1)</b>    | <b>72.5 (69.8-75.3)</b>    | <b>0.019</b>  | 74.7 (69.0-80.4)           | 70.4 (67.2-73.5)           | 0.18         |
| Stroke Mechanism (%)                                   |                            |                            | 0.26          |                            |                            | 0.39         |
| - Cardioembolic                                        | 32/41 (78.1)               | 153/245(62.5)              |               | 28/65 (43.1)               | 118/215 (54.9)             |              |
| - Large artery                                         | 2/41 (4.9)                 | 42/245 (17.1)              |               | 21/65 (32.3)               | 50/215 (23.3)              |              |
| - ESUS                                                 | 3/41 (7.3)                 | 29/245 (11.8)              |               | 10/65 (15.4)               | 27/215 (12.6)              |              |
| - Undetermined                                         | 4/41 (9.8)                 | 21/245 (8.6)               |               | 6/65 (9.2)                 | 20/215 (9.3)               |              |
| <b>Baseline deficits and stroke locations</b>          |                            |                            |               |                            |                            |              |
| Baseline NIHSS (mean, 95%CI)                           | 15.2 (13.6-16.9)           | 14.9 (14.2-15.6)           | 0.65          | 17 (15.5-18.5)             | 18.7 (18.0-19.3)           | 0.082        |
| Altered level of consciousness (%)*                    | 28/40 (70.0)               | 141/245 (57.6)             | 0.17          | 42/65 (64.6)               | 155/213 (72.8)             | 0.22         |
| <b>Gaze palsy (%)*</b>                                 | 32/41 (78.1)               | 155/245(63.3)              | 0.077         | <b>48/65 (73.9)</b>        | <b>191/216 (88.4)</b>      | <b>0.009</b> |
| Hemianopia (%)*                                        | 25/40 (62.5)               | 136/245(55.5)              | 0.49          | 47/65 (72.3)               | 171/213 (80.3)             | 0.17         |
| Hemiplegia (%)*                                        | 26/41 (63.4)               | 187/245(76.3)              | 0.085         | 53/65 (81.5)               | 193/216 (89.4)             | 0.13         |
| Ataxia (%)*                                            | 2/39 (5.1)                 | 18/243 (7.4)               | 1.00          | 5/64 (7.8)                 | 8/210 (3.8)                | 0.19         |
| Hemianesthesia (%)*                                    | 5/40 (12.5)                | 50/245 (20.4)              | 0.29          | 22/65 (33.9)               | 77/213 (36.2)              | 0.77         |
| Any aphasia (%)*                                       | 28/40 (70.0)               | 129/245(52.7)              | 0.058         | 36/65 (55.4)               | 131/213 (61.5)             | 0.39         |
| Any dysarthria (%)*                                    | 34/39 (87.2)               | 213/244(87.3)              | 1.00          | 53/64 (82.8)               | 167/209 (79.9)             | 0.72         |
| Any neglect (%)*                                       | 18/40 (45.0)               | 138/245(56.3)              | 0.23          | 40/65 (61.5)               | 131/213 (61.5)             | 1.00         |
| Left vs Right (%)                                      | 22/41 (53.7)               | 118/245(48.2)              | 0.61          | 40/65 (61.5)               | 116/215 (54.0)             | 0.32         |
| ASPECTS score (mean, 95%CI)                            | 8.5 (8.2-8.8)              | 8.4 (8.3-8.6)              | 0.89          | 6.9 (6.4-7.4)              | 7.1 (6.8-7.3)              | 0.51         |
| <b>Involves:</b>                                       |                            |                            |               |                            |                            |              |
| Caudate (%)                                            | 11/41 (26.8)               | 50/241 (20.8)              | 0.41          | 24/65 (36.9)               | 70/214 (32.7)              | 0.55         |
| Lentiform nucleus(%)                                   | 27/41 (65.9)               | 157/241(65.2)              | 1.00          | 47/65 (72.3)               | 170/214 (79.4)             | 0.24         |
| Insula (%)                                             | 20/41 (48.8)               | 130/241(53.9)              | 0.61          | 56/65 (86.2)               | 175/214 (81.8)             | 0.46         |
| Internal capsule (%)                                   | 1/41 (2.4)                 | 0/241                      | 0.15          | 0/65                       | 1/214 (0.47)               | 1.00         |
| M1 (%)                                                 | 0/41                       | 3/241 (1.2)                | 1.00          | 11/65 (16.90)              | 24/214 (11.2)              | 0.28         |
| M2 (%)                                                 | 1/41 (2.4)                 | 18/241 (7.5)               | 0.33          | 12/65 (18.5)               | 50/214 (23.4)              | 0.50         |
| M3 (%)                                                 | 0/41                       | 1/241 (0.41)               | 1.00          | 9/65 (13.9)                | 23/214 (10.8)              | 0.51         |
| M4 (%)                                                 | 1/41 (2.4)                 | 6/241 (2.5)                | 1.00          | 17/65 (26.2)               | 46/214 (21.5)              | 0.50         |
| M5 (%)                                                 | 0/41                       | 8/241 (3.3)                | 0.61          | 16/65 (24.6)               | 47/214 (22.0)              | 0.74         |

|                                  |              |               |      |              |                |      |
|----------------------------------|--------------|---------------|------|--------------|----------------|------|
| M6 (%)                           | 0/41         | 3/241 (1.2)   | 1.00 | 9/65 (13.9)  | 21/214 (9.8)   | 0.37 |
| Any M1-M6 (%)                    | 2/41 (4.9)   | 28/241 (11.6) | 0.28 | 32/65 (49.2) | 84/214 (39.3)  | 0.15 |
| <b>Deep vs cortical (%)</b>      |              |               | 0.84 |              |                | 0.36 |
| Deep (thalamus or basal ganglia) | 14/41 (34.1) | 90/241 (37.3) |      | 2/65 (3.1)   | 2/214 (0.9)    |      |
| Superficial (cortical)           | 5/41 (12.2)  | 30/241 (12.4) |      | 4/65 (6.2)   | 12/214 (5.6)   |      |
| Both deep & cortical             | 22/41 (53.7) | 121/241(50.2) |      | 59/65 (90.8) | 200/214 (93.5) |      |

ASPECTS – Alberta Stroke Program Early Computed Tomography Score, ESUS – Embolic Stroke of Undetermined Source, mRS – Modified Rankin Scale, NIHSS – National Institutes of Health Stroke Scale Score, SBP – Systolic Blood Pressure, DBP – Diastolic BP

\* Neurological deficits at presentation were coded based on components of the baseline NIHSS assessment: altered level of consciousness as a total score $\geq$ 1 on NIHSS Q1a-c, gaze palsy as score $\geq$ 1 on NIHSS Q2, hemianopia as score $\geq$ 1 on NIHSS Q3, hemiplegia as total score $\geq$ 5 on NIHSS Q4-6 (either the right on Q5-6 or left on Q5-6), ataxia as score $\geq$ 1 on NIHSS Q7, hemianesthesia as score $\geq$ 2 on NIHSS Q8, aphasia as score $\geq$ 1 on NIHSS Q9, dysarthria as score $\geq$ 1 on NIHSS Q10, and neglect as score $\geq$ 1 on NIHSS Q11. Whereas discrepant cases with large-PIV seemed less likely to have any gaze palsy at baseline versus non-discrepant cases, there was no difference in the presence of severe gaze palsy (score=2 on NIHSS Q2, 38.5% non-discrepant vs 52.1% discrepant,  $p=0.065$ ). Both for small-PIV and large-PIV groups, there were no differences between discrepant and non-discrepant cases when we defined the deficits differently including: severe loss of consciousness (score $\geq$ 3 on NIHSS Q1a-c), severe gaze palsy/deviation (score=2 on NIHSS Q2), severe hemianopia (score $\geq$ 2 on NIHSS Q3), hemiparesis (score $\geq$ 2 on NIHSS Q6), severe ataxia (score $\geq$ 2 on NIHSS Q7), severe aphasia (score $\geq$ 2 on NIHSS Q9), severe dysarthria (score=2 on NIHSS Q10), or severe neglect (score=2 on NIHSS Q11).



**eTable 5. Comparison of Treatment-Related and Posttreatment Factors, Including Serious Adverse Events (SAEs), in Discrepant vs Nondiscrepant Cases**

Patients with small follow-up infarct volume or FIV (defined as FIV≤7mL) and poor outcome (defined as 90-day mRS≥3) considered discrepant; patients with small FIV and good outcome (mRS≤2) considered nondiscrepant; patients with large FIV (defined as FIV≥92mL) and good outcome (defined as mRS≤2) considered discrepant; patients with large FIV and bad outcome considered nondiscrepant. Variables significant at p<0.05 are bolded; those also significant with Hochberg correction (p<0.0013) are indicated with asterisk (\*).

| Treatment-related or post-treatment factor                                       | (A) FIV≤7mL                |                            |                    | (B) FIV≥92mL               |                            |                    |
|----------------------------------------------------------------------------------|----------------------------|----------------------------|--------------------|----------------------------|----------------------------|--------------------|
|                                                                                  | Discrepant                 | Non-discrepant             | P-value            | Discrepant                 | Non-discrepant             | P-value            |
| <b>Treatments Received</b>                                                       |                            |                            |                    |                            |                            |                    |
| Intervention (NA1) vs Control (%)                                                | 25/41 (61.0)               | 118/245 (48.2)             | 0.18               | 27/65 (41.5)               | 99/216 (45.8)              | 0.57               |
| IV alteplase given (%)                                                           | 28/41 (68.3)               | 147/245 (60.0)             | 0.39               | 41/65 (63.1)               | 112/216 (51.9)             | 0.12               |
| Onset-to-groin-puncture time, minutes (mean, 95%CI)                              | 213.0 (168.6-257.3)        | 202.4 (184.6-220.2)        | 0.41               | 266.2 (220.2-312.3)        | 282.4 (258.8-306.0)        | 0.22               |
| Onset-to-reperfusion time, minutes (mean, 95%CI)                                 | 242.0 (195.9-288.1)        | 232.9 (214.4-251.5)        | 0.34               | 299.0 (250.7-347.2)        | 310.7 (283.6-337.8)        | 0.25               |
| <b>Onset-to-needle time, minutes (mean,95%CI)</b>                                | <b>139.3 (105.3-173.2)</b> | <b>103.7 (95.6-111.8)</b>  | <b>0.016</b>       | 116.2 (94.6-137.8)         | 122.9 (110.9-134.9)        | 0.36               |
| Reperfusion quality: modified Thrombolysis in Cerebral Infarction mTICI 2b-3 (%) | 37/41 (90.2)               | 231/242 (95.5)             | 0.25               | 54/65 (83.1)               | 153/209 (73.2)             | 0.14               |
| <b>General anesthesia (%)</b>                                                    | 11/41 (26.8)               | 40/242 (16.5)              | 0.20               | <b>7/65 (10.8)</b>         | <b>61/213 (28.6)</b>       | <b>0.009</b>       |
| Length of in-hospital rehabilitation (mean days, 95%CI)                          | 29.5 (21.3-37.7)           | 20.7 (16.9-24.5)           | <b>0.032</b>       | 26.6 (19.6-33.6)           | 36.2 (28.8-43.6)           | 0.073              |
| <b>Post-treatment Parameters</b>                                                 |                            |                            |                    |                            |                            |                    |
| <b>SBP at 24-hours (mean mmHg, 95%CI)</b>                                        | 128.0(125.6-130.3)         | 129.7(123.3-136.0)         | 0.69               | <b>126.0(121.5-130.5)</b>  | <b>135.0 (132.4-137.7)</b> | <b>0.0009*</b>     |
| <b>DBP at 24-hours (Mean, 95%CI)</b>                                             | 66.3 (62.2-70.5)           | 68.8 (67.3-70.3)           | 0.098              | <b>64.9 (62.0-67.8)</b>    | <b>68.6 (66.8-70.4)</b>    | <b>0.041</b>       |
| <b>Heart Rate at 24-hours (Mean, 95%CI)</b>                                      | 79.9 (74.3-85.5)           | 76.0 (74.1-78.0)           | 0.20               | <b>75.3 (72.0-78.6)</b>    | <b>81.3 (79.0-83.5)</b>    | <b>0.0088</b>      |
| <b>Hemoglobin at 24-hours (Mean g/L, 95%CI)</b>                                  | <b>111.0 (105.3-116.7)</b> | <b>122.0 (119.9-124.2)</b> | <b>0.0004*</b>     | <b>126.2 (122.0-130.4)</b> | <b>118.3 (115.8-120.8)</b> | <b>0.0013*</b>     |
| <b>Hematocrit at 24-hours</b>                                                    | <b>0.34 (0.32-0.36)</b>    | <b>0.37 (0.36-0.37)</b>    | <b>0.0032</b>      | <b>0.37 (0.36-0.39)</b>    | <b>0.35 (0.35-0.36)</b>    | <b>0.0054</b>      |
| Platelets at 24-hours (Mean x10 <sup>9</sup> /L, 95%CI)                          | 200.7(179.4-222.0)         | 202.6 (194.8-210.4)        | 0.87               | 212.4(194.2-230.7)         | 200.0 (191.3-208.7)        | 0.41               |
| <b>Glucose at 24-hours (Mean, 95%CI)</b>                                         | 7.0 (6.2-7.7)              | 6.3 (6.1-6.5)              | 0.063              | <b>6.7 (6.2-7.2)</b>       | <b>8.4 (7.9-8.8)</b>       | <b>&lt;0.0001*</b> |
| Creatinine at 24-hours (Mean umol/L, 95%CI)                                      | 84.1 (74.1-94.0)           | 77.3 (74.1-80.5)           | 0.19               | 75.2 (69.4-80.9)           | 80.9 (76.5-85.4)           | 0.28               |
| Estimated Glomerular Filtration Rate at 24-hours (Mean, 95%CI)                   | 71.1 (64.4-77.8)           | 79.1 (76.1-82.1)           | 0.056              | 83.5 (77.3-89.8)           | 78.5 (75.2-81.8)           | 0.12               |
| <b>24-hour NIHSS (mean, 95%CI)</b>                                               | <b>6.5 (4.7-8.2)</b>       | <b>2.5 (2.1-3.0)</b>       | <b>&lt;0.0001*</b> | <b>9.2 (7.5-10.9)</b>      | <b>18.4 (17.5-19.4)</b>    | <b>&lt;0.0001*</b> |
| <b>48-hour NIHSS</b>                                                             | <b>5.8 (4.3-7.2)</b>       | <b>1.8 (1.3-2.2)</b>       | <b>&lt;0.0001*</b> | <b>7.2 (5.6-8.7)</b>       | <b>18.2 (17.2-</b>         | <b>&lt;0.0001*</b> |

|                                                                           |                     |                      |                   |                     |                       |                   |
|---------------------------------------------------------------------------|---------------------|----------------------|-------------------|---------------------|-----------------------|-------------------|
| (mean, 95%CI)                                                             |                     |                      |                   |                     | 19.2)                 |                   |
| <b>Serious Adverse Events (SAEs)</b>                                      |                     |                      |                   |                     |                       |                   |
| <b>Any SAE (%)</b>                                                        | <b>20/41 (48.9)</b> | <b>53/245 (21.6)</b> | <b>0.001*</b>     | <b>13/65 (20.3)</b> | <b>139/216 (64.7)</b> | <b>&lt;0.001*</b> |
| <b>Likely index stroke-related SAEs, not clearly EVT-attributable (%)</b> | <b>2/41 (4.9)</b>   | <b>1/245 (0.4)</b>   | <b>0.055</b>      | <b>4/65 (6.2)</b>   | <b>61/216 (28.2)</b>  | <b>&lt;0.001*</b> |
| <b>Progression of index stroke</b>                                        | 1/41 (2.4)          | 0                    | 0.14              | <b>3/65 (4.6)</b>   | <b>59/216 (27.3)</b>  | <b>&lt;0.001*</b> |
| Functional decline or failure to thrive                                   | 0                   | 0                    |                   | 0/65                | 1/216 (0.5)           | 1.00              |
| Seizures                                                                  | 1/41 (2.4)          | 1/245 (0.4)          | 0.27              | 1/64 (1.6)          | 1/215 (0.5)           | 0.41              |
| <b>EVT/thrombolysis-related SAEs (%)</b>                                  | <b>7/41 (17.1)</b>  | <b>21/245 (8.6)</b>  | <b>0.095</b>      | <b>12/65 (18.5)</b> | <b>70/216 (32.4)</b>  | <b>0.030</b>      |
| <b>Symptomatic intracerebral hemorrhage (sICH)</b>                        | 0                   | 2/245 (0.8)          | 1.00              | <b>2/65 (3.1)</b>   | <b>29/216 (13.4)</b>  | <b>0.022</b>      |
| Intra-procedural complications                                            | 3/41 (7.3)          | 10/245 (4.1)         | 0.41              | 8/65 (12.3)         | 34/216 (15.7)         | 0.56              |
| - Dissection                                                              | 1/41 (2.4)          | 6/244 (2.5)          | 1.00              | 4/65 (6.2)          | 9/215 (4.2)           | 0.51              |
| - Embolism                                                                | 0/41                | 6/244 (2.5)          | 0.60              | 5/65 (7.7)          | 21/215 (9.8)          | 0.81              |
| - Perforation                                                             | 2/41 (4.9)          | 3/244 (1.2)          | 0.15              | 0/65                | 11/215 (5.1)          | 0.073             |
| - Iliofemoral pseudoaneurysm                                              | 0                   | 0                    |                   | 0/65                | 1/216 (0.5)           | 1.00              |
| <b>Infarct in New Territory</b>                                           | <b>5/41 (12.2)</b>  | <b>8/243 (3.3)</b>   | <b>0.026</b>      | 4/64 (6.3)          | 31/209 (14.8)         | 0.088             |
| Stent/intracranial re-occlusion                                           | 0                   | 0                    |                   | 0/65                | 1/216 (0.5)           | 1.00              |
| <b>Secondary prevention-related SAEs (%)</b>                              | <b>7/41 (17.1)</b>  | <b>19/245 (7.8)</b>  | <b>0.074</b>      | <b>3/65 (4.6)</b>   | <b>18/216 (8.3)</b>   | <b>0.43</b>       |
| <b>Recurrent stroke</b>                                                   | <b>5/41 (12.2)</b>  | <b>6/245 (2.5)</b>   | <b>0.011</b>      | 0/65                | 8/216 (3.7)           | 0.21              |
| Acute Coronary Syndrome                                                   | 1/41 (2.4)          | 4/245 (1.6)          | 0.54              | 1/64 (1.6)          | 4/215 (1.9)           | 1.00              |
| Chest Pain or other pain                                                  | 0                   | 0                    |                   | 0/65                | 1/216 (0.5)           | 1.00              |
| Limb or Bowel Ischemia                                                    | 1/41 (2.4)          | 3/245 (1.2)          | 0.46              | 1/64 (1.6)          | 3/215 (1.4)           | 1.00              |
| Central Retinal Artery Occlusion                                          | 0                   | 1/245 (0.4)          | 1.00              | 0                   | 0                     |                   |
| Transient Ischemic Attack                                                 | 1/41 (2.4)          | 5/245 (2.0)          | 1.00              | 1/65 (1.5)          | 0/216                 | 0.23              |
| Cardiac Arrest                                                            | 0                   | 1/245 (0.4)          | 1.00              | 0/65                | 3/216 (1.4)           | 1.00              |
| <b>Systemic SAEs, potentially stroke unit care-related (%)</b>            | <b>13/41 (31.7)</b> | <b>17/245 (6.9)</b>  | <b>&lt;0.001*</b> | <b>5/65 (7.7)</b>   | <b>57/216 (26.4)</b>  | <b>0.001*</b>     |
| <b>Pneumonia (all)</b>                                                    | <b>3/41 (7.3)</b>   | <b>2/245 (0.8)</b>   | <b>0.022</b>      | <b>0/65</b>         | <b>17/216 (7.9)</b>   | <b>0.015</b>      |
| <b>Aspiration Pneumonia</b>                                               | 1/41 (2.4)          | 1/245 (0.4)          | 0.27              | <b>0/64</b>         | <b>15/215 (7.0)</b>   | <b>0.026</b>      |
| Respiratory Failure                                                       | 1/41 (2.4)          | 0                    | 0.14              | 0/64                | 12/215 (5.6)          | 0.074             |
| Dysphagia                                                                 | 0                   | 0                    |                   | 0/65                | 1/216 (0.5)           | 1.00              |
| Deep vein thrombosis or pulmonary embolism                                | 1/41 (2.4)          | 1/245 (0.4)          | 0.27              | 0/65                | 3/216 (1.4)           | 1.00              |
| Extracranial hemorrhage                                                   | 2/41 (4.9)          | 4/245 (1.6)          | 0.21              | 0/64                | 4/215 (1.9)           | 0.58              |
| Gastrointestinal Bleed                                                    | 1/41 (2.4)          | 1/245 (0.4)          | 0.27              | 1/64 (1.6)          | 1/215 (0.5)           | 0.41              |
| Anemia                                                                    | 1/41 (2.4)          | 1/245 (0.4)          | 0.27              | 0/65                | 1/216 (0.5)           | 1.00              |
| <b>Congestive heart failure</b>                                           | <b>3/41 (7.3)</b>   | <b>2/245 (0.8)</b>   | <b>0.022</b>      | 0/65                | 1/216 (0.5)           | 1.00              |
| Hypotension                                                               | 1/41 (2.4)          | 0/245                | 0.14              | 0/65                | 2/216 (0.9)           | 1.00              |
| Sepsis                                                                    | 1/41 (2.4)          | 2/245 (0.8)          | 0.37              | 1/65 (1.5)          | 10/216 (4.6)          | 0.47              |
| Urinary Tract Infection                                                   | 1/41 (2.4)          | 2/245 (0.8)          | 0.37              | 0/65                | 6/216 (2.8)           | 0.34              |
| Other infection                                                           | 1/41 (2.4)          | 2/245 (0.8)          | 0.37              | 0/65                | 3/216 (1.4)           | 1.00              |
| Trauma or injuries                                                        | 1/41 (2.4)          | 3/245 (1.2)          | 0.46              | 1/65 (1.5)          | 2/216 (0.9)           | 0.55              |

|                                             |                   |                    |             |             |                    |             |
|---------------------------------------------|-------------------|--------------------|-------------|-------------|--------------------|-------------|
| Acute Kidney Injury                         | 1/41 (2.4)        | 0                  | 0.14        | 0/65        | 2/216 (0.9)        | 1.00        |
| Depression                                  | 1/41 (2.4)        | 0                  | 0.14        | 0/65        | 1/216 (0.5)        | 1.00        |
| Delirium or encephalopathy                  | 0                 | 0                  |             | 1/65 (1.5)  | 2/216 (0.9)        | 0.55        |
| Displaced gastrostomy tube                  | 0                 | 0                  |             | 0           | 0                  |             |
| <b>Miscellaneous/idiosyncratic SAEs (%)</b> | <b>2/41 (4.9)</b> | <b>7/245 (2.9)</b> | <b>0.62</b> | <b>0/65</b> | <b>3/216 (1.4)</b> | <b>1.00</b> |

**eTable 6. Comparison of Prespecified and Stepwise Multivariable Logistic Regression Models for the Association of Pretreatment Variables Among 1091 Patients and Treatment-Related or Posttreatment Variables Among 1086 Patients in Prespecified Model and 631 Patients in Stepwise Model for the Outcome of mRS Score of 3 or Greater Despite FIV of 7 mL or Less in the ESCAPE-NA1 Trial**

In this iteration, the generic serious adverse event (SAE) variable in the pre-specified model has been replaced with the more specific SAEs that differed between discrepant and non-discrepant cases in univariable analyses of the ESCAPE-NA1 dataset. All models were also adjusted for FIV, alteplase, nerinetide, and interaction of alteplase with nerinetide treatment.

| Outcome: FIV≤7mL & mRS≥3                                        |                  |          |                                                                                 |                  |          |
|-----------------------------------------------------------------|------------------|----------|---------------------------------------------------------------------------------|------------------|----------|
| (1) Model with pre-specified variables based on ESCAPE analysis |                  |          | (2) Model with variables selected by stepwise multivariable logistic regression |                  |          |
| Variable                                                        | aOR(95%CI)       | P> z     | Variable                                                                        | aOR(95%CI)       | P> z     |
| <b>A. PRE-TREATMENT FACTORS</b>                                 |                  |          |                                                                                 |                  |          |
| Age (per year)                                                  | 1.08(1.04-1.13)  | <0.001   | Age (per year)                                                                  | 1.08 (1.04-1.12) | <0.001   |
| Cancer                                                          | 61.6 (2.91-1304) | 0.008    |                                                                                 |                  |          |
| Vascular risk factors (number)                                  | 1.30 (1.06-1.59) | 0.013    | Vascular risk factors (number)                                                  | 1.27 (1.04-1.56) | 0.018    |
| <b>AUC (95%CI)</b>                                              | 0.92 (0.89-0.95) | P<0.0001 |                                                                                 | 0.93 (0.90-0.95) | P<0.0001 |
| <b>Pearson X<sup>2</sup></b>                                    | 344              | P=1.00   |                                                                                 | 329              | P=1.00   |
| <b>Hosmer-Lemeshow X<sup>2</sup></b>                            | 0.37             | P=0.95   |                                                                                 | 0.46             | P=0.93   |
| <b>B. TREATMENT/POST-TREATMENT FACTORS</b>                      |                  |          |                                                                                 |                  |          |
| INT                                                             | 6.84 (1.99-23.5) | 0.002    | INT                                                                             | 8.35 (1.81-38.5) | 0.006    |
| Recurrent stroke                                                | 8.33 (2.22-31.2) | 0.002    | Recurrent stroke                                                                | 12.9 (1.96-84.3) | 0.008    |
| Pneumonia                                                       | 12.1 (2.18-66.7) | 0.004    | Pneumonia                                                                       | 9.0 (0.73-109)   | 0.087    |
| CHF                                                             | 10.7 (1.69-67.5) | 0.012    | Hemoglobin at 24-hours (per g/L increase)                                       | 0.96 (0.93-0.99) | 0.003    |
|                                                                 |                  |          |                                                                                 |                  |          |
| <b>AUC (95%CI)</b>                                              | 0.91 (0.88-0.94) | P<0.0001 |                                                                                 | 0.93 (0.90-0.96) | <0.0001  |
| <b>Pearson X<sup>2</sup></b>                                    | 240              | P=1.00   |                                                                                 | 142              | P=1.00   |
| <b>Hosmer-Lemeshow X<sup>2</sup></b>                            | 0.76             | P=0.86   |                                                                                 | 0.22             | P=0.97   |

No difference in AUC for pre-treatment factor models 1 and 2, P=0.66.

No difference in AUC for treatment/post-treatment factor models 1 and 2, P=0.23.

aOR=adjusted odds ratio; AUC=Area under the receiver-operating-characteristics curve; CHF=congestive heart failure (new or exacerbation); CI=confidence interval; INT=Infarct in New Territory; mRS=modified Rankin Scale score; FIV=follow-up infarct volume

**eTable 7. Comparison of Prespecified and Stepwise Multivariable Logistic Regression Models for the Association of Pretreatment Variables Among 1094 Patients and Treatment-Related or Posttreatment Variables Among 1089 Patients for the Outcome of mRS Score of 4 or Greater Despite FIV of 7 mL or Less in the ESCAPE-NA1 Trial**

All models were also adjusted for FIV, alteplase, nerinetide, and interaction of alteplase with nerinetide treatment.

| Outcome: FIV≤7mL & mRS≥4                                        |                  |          |                                                                                 |                  |          |
|-----------------------------------------------------------------|------------------|----------|---------------------------------------------------------------------------------|------------------|----------|
| (1) Model with pre-specified variables based on ESCAPE analysis |                  |          | (2) Model with variables selected by stepwise multivariable logistic regression |                  |          |
| Variable                                                        | aOR(95%CI)       | P> z     | Variable                                                                        | aOR(95%CI)       | P> z     |
| <b>A. PRE-TREATMENT FACTORS</b>                                 |                  |          |                                                                                 |                  |          |
| Age (per year)                                                  | 1.08 (1.03-1.13) | 0.003    | Age (per year)                                                                  | 1.08 (1.03-1.13) | 0.003    |
| Cancer                                                          | 16.5 (1.08-251)  | 0.044    | Cancer                                                                          | 16.5 (1.08-251)  | 0.044    |
| Vascular risk factors (number)                                  | 1.47 (1.14-1.88) | 0.002    | Vascular risk factors (number)                                                  | 1.47 (1.14-1.88) | 0.002    |
| <b>AUC (95%CI)</b>                                              | 0.93 (0.91-0.96) | P<0.0001 |                                                                                 | 0.93 (0.91-0.96) | P<0.0001 |
| <b>Pearson X<sup>2</sup></b>                                    | 297              | P=1.00   |                                                                                 | 297              | P=1.00   |
| <b>Hosmer-Lemeshow X<sup>2</sup></b>                            | 0.38             | P=0.94   |                                                                                 | 0.38             | P=0.94   |
| <b>B. TREATMENT/POST-TREATMENT FACTORS</b>                      |                  |          |                                                                                 |                  |          |
| INT                                                             | 4.31 (0.84-22.0) | 0.080    |                                                                                 |                  |          |
| Recurrent stroke                                                | 7.34 (1.62-33.3) | 0.010    | Recurrent stroke                                                                | 6.80 (1.52-30.5) | 0.012    |
| Pneumonia                                                       | 23.2 (5.08-106)  | <0.001   | Pneumonia                                                                       | 19.9 (4.54-87.5) | <0.001   |
| CHF                                                             | 25.1 (4.11-154)  | <0.001   | CHF                                                                             | 22.2 (3.76-132)  | 0.001    |
|                                                                 |                  |          |                                                                                 |                  |          |
| <b>AUC (95%CI)</b>                                              | 0.90 (0.86-0.94) | P<0.0001 |                                                                                 | 0.91 (0.87-0.95) | P<0.0001 |
| <b>Pearson X<sup>2</sup></b>                                    | 230              | P=1.00   |                                                                                 | 281              | P=1.00   |
| <b>Hosmer-Lemeshow X<sup>2</sup></b>                            | 1.36             | P=0.71   |                                                                                 | 0.43             | P=0.93   |

No difference in AUC for pre-treatment factor models 1 and 2; P=1.00.

No difference in AUC for treatment/post-treatment factor models 1 and 2; P=0.15.

aOR=adjusted odds ratio; AUC=Area under the receiver-operating-characteristics curve; CHF=congestive heart failure (new or exacerbation); CI=confidence interval; INT=Infarct in New Territory; mRS=modified Rankin Scale score; FIV=follow-up infarct volume

**eTable 8. Comparison of Prespecified and Stepwise Multivariable Logistic Regression Models for the Association of Treatment-Related or Posttreatment Variables Among 918 Patients for the Outcome of mRS Score of 3 or Greater Despite FIV of 7 mL or Less in the ESCAPE-NA1 Trial With 24-Hour or 48-hour NIHSS Included as a Posttreatment Variable**

In this iteration, we permitted the 24- or 48-hour NIHSS to be included as a post-treatment variable. All models were also adjusted for FIV, alteplase, nerinetide, and interaction of alteplase with nerinetide treatment.

| Outcome: FIV≤7mL & mRS≥3                                        |                  |          |                                                                                                                                         |                  |          |
|-----------------------------------------------------------------|------------------|----------|-----------------------------------------------------------------------------------------------------------------------------------------|------------------|----------|
| (1) Model with pre-specified variables based on ESCAPE analysis |                  |          | (2) Model with variables selected by stepwise multivariable logistic regression, and with onset-to-alteplase time included (limiting N) |                  |          |
| Variable                                                        | aOR(95%CI)       | P> z     | Variable                                                                                                                                | aOR(95%CI)       | P> z     |
| INT                                                             | 9.25 (1.62-53.0) | 0.012    |                                                                                                                                         |                  |          |
| Recurrent stroke                                                | 7.39 (1.39-39.3) | 0.019    | Recurrent stroke                                                                                                                        | 25.1 (3.21-196)  | 0.002    |
| Pneumonia                                                       | 8.93 (1.52-52.5) | 0.015    |                                                                                                                                         |                  |          |
| CHF                                                             | 4.42 (0.45-43.7) | 0.20     | Hemoglobin at 24-hours (per g/L increase)                                                                                               | 0.94 (0.91-0.98) | 0.001    |
| 48-hour NIHSS (per unit increase)                               | 1.21 (1.11-1.32) | <0.001   | 24-hour NIHSS (per unit increase)                                                                                                       | 1.23 (1.11-1.36) | <0.001   |
| N                                                               | 920              |          |                                                                                                                                         | 616              |          |
| <b>AUC (95%CI)</b>                                              | 0.95 (0.92-0.97) | P<0.0001 |                                                                                                                                         | 0.95 (0.93-0.98) | P<0.0001 |
| <b>Pearson X<sup>2</sup></b>                                    | 147              | P=1.00   |                                                                                                                                         | 115              | P=1.00   |
| <b>Hosmer-Lemeshow X<sup>2</sup></b>                            | 1.49             | P=0.69   |                                                                                                                                         | 0.84             | P=0.84   |
|                                                                 |                  |          | (2) Model with variables selected by stepwise multivariable logistic regression, without onset-to-alteplase time                        |                  |          |
|                                                                 |                  |          | Variable                                                                                                                                | aOR(95%CI)       | P> z     |
|                                                                 |                  |          | INT                                                                                                                                     | 9.58 (1.65-55.4) | 0.012    |
|                                                                 |                  |          | Recurrent Stroke                                                                                                                        | 7.27 (1.23-42.9) | 0.029    |
|                                                                 |                  |          | Systemic SAEs, potentially stroke unit care-related                                                                                     | 6.63 (2.52-17.5) | <0.001   |
|                                                                 |                  |          | 48-hour NIHSS (per unit increase)                                                                                                       | 1.22 (1.12-1.34) | <0.001   |
|                                                                 |                  |          | N                                                                                                                                       | 920              |          |
|                                                                 |                  |          | <b>AUC (95%CI)</b>                                                                                                                      | 0.95 (0.93-0.97) | P<0.0001 |
|                                                                 |                  |          | <b>Pearson X<sup>2</sup></b>                                                                                                            | 159              | P=1.00   |
|                                                                 |                  |          | <b>Hosmer-Lemeshow X<sup>2</sup></b>                                                                                                    | 1.08             | P=0.78   |

No difference in AUC for model 1 vs 2, p=0.51; or between model 1 vs 3, p=0.31.

aOR=adjusted odds ratio; AUC=Area under the receiver-operating-characteristics curve; CHF=congestive heart failure (new or exacerbation); CI=confidence interval; INT=Infarct in New Territory; mRS=modified Rankin Scale score; FIV=follow-up infarct volume

**eTable 9. Comparison of Prespecified and Stepwise Multivariable Logistic Regression Models for the Association of Pretreatment Variables Among 254 Patients and Treatment-Related or Posttreatment Variables Among 256 Patients for Outcome of mRS Score of 4 or Greater Despite FIV of 7 mL or Less in the ESCAPE-NA1 Trial, Restricted to Patients With MRI for FIV Determination**  
All models were also adjusted for FIV, alteplase, nerinetide, and interaction of alteplase with nerinetide treatment.

| Outcome: FIV≤7mL & mRS≥3                                        |                                       |             |                                                                                 |                  |          |
|-----------------------------------------------------------------|---------------------------------------|-------------|---------------------------------------------------------------------------------|------------------|----------|
| (1) Model with pre-specified variables based on ESCAPE analysis |                                       |             | (2) Model with variables selected by stepwise multivariable logistic regression |                  |          |
| Variable                                                        | aOR(95%CI)                            | P> z        | Variable                                                                        | aOR(95%CI)       | P> z     |
| <b>A. PRE-TREATMENT FACTORS</b>                                 |                                       |             |                                                                                 |                  |          |
| Age (per year)                                                  | 1.15 (1.03-1.29)                      | 0.016       | Age (per year)                                                                  | 1.15 (1.02-1.30) | 0.028    |
| Cancer                                                          | Perfect predictor                     | n=2 dropped | Baseline hemoglobin (per g/L increase)                                          | 0.93 (0.88-0.99) | 0.026    |
| Vascular risk factors (number)                                  | 1.16 (0.68-1.98)                      | 0.59        |                                                                                 |                  |          |
| <b>AUC (95%CI)</b>                                              | 0.89 (0.80-0.98)                      | P<0.0001    |                                                                                 | 0.92 (0.85-0.98) | P<0.0001 |
| <b>Pearson X<sup>2</sup></b>                                    | 72.8                                  | P=1.00      |                                                                                 | 38.7             | P=1.00   |
| <b>Hosmer-Lemeshow X<sup>2</sup></b>                            | 0.25                                  | P=0.97      |                                                                                 | 0.04             | P=1.00   |
| <b>B. TREATMENT/POST-TREATMENT FACTORS</b>                      |                                       |             |                                                                                 |                  |          |
| INT                                                             | 20.1 (2.43-167)                       | 0.005       | INT                                                                             | 8.47 (0.69-104)  | 0.094    |
| Recurrent stroke                                                | 11.6 (0.84-161)                       | 0.068       | Recurrent stroke                                                                | 51.9 (1.40-1920) | 0.032    |
| Pneumonia                                                       | 86.2 (0.43-17111)                     | 0.099       | Hemoglobin at 24-hours (per g/L increase)                                       | 0.88 (0.80-0.98) | 0.017    |
| CHF                                                             | Dropped as no discrepant case had CHF | n=3         |                                                                                 |                  |          |
| <b>AUC (95%CI)</b>                                              | 0.87 (0.68-0.99)                      | P<0.0001    |                                                                                 | 0.62 (0.10-0.99) | P<0.0001 |
| <b>Pearson X<sup>2</sup></b>                                    | 90.7                                  | P=1.00      |                                                                                 | 0.00             | P=1.00   |
| <b>Hosmer-Lemeshow X<sup>2</sup></b>                            | 1.48                                  | P=0.69      |                                                                                 | 0.00             | P=1.00   |

AUC no different for pre-treatment factor model 1 vs 2, p=0.35.

AUC no different for treatment/post-treatment factor model 2 vs 1, p=0.14.

aOR=adjusted odds ratio; AUC=Area under the receiver-operating-characteristics curve; CHF=congestive heart failure (new or exacerbation); CI=confidence interval; INT=Infarct in New Territory; mRS=modified Rankin Scale score; FIV=follow-up infarct volume

**eTable 10. Comparison of Prespecified and Stepwise Multivariable Logistic Regression Models for the Association of Pretreatment Variables Among 1091 Patients and Treatment-Related or Posttreatment Variables Among 1082 Patients for the Outcome of mRS Score of 2 or Less Despite FIV of 92 mL or Greater in the ESCAPE-NA1 Trial**

In this iteration, the generic serious adverse event (SAE) variable in the pre-specified model has been replaced with the more specific SAEs that differed between discrepant and non-discrepant cases in univariable analyses of the ESCAPE-NA1 dataset. All models were also adjusted for FIV, alteplase, nerinetide, and interaction of alteplase with nerinetide treatment.

| Outcome: FIV≥92mL & mRS≤2                                       |                                |              |                                                                                 |                  |          |
|-----------------------------------------------------------------|--------------------------------|--------------|---------------------------------------------------------------------------------|------------------|----------|
| (1) Model with pre-specified variables based on ESCAPE analysis |                                |              | (2) Model with variables selected by stepwise multivariable logistic regression |                  |          |
| Variable                                                        | aOR(95%CI)                     | P> z         | Variable                                                                        | aOR(95%CI)       | P> z     |
| <b>A. PRE-TREATMENT FACTORS</b>                                 |                                |              |                                                                                 |                  |          |
| Age (per year)                                                  | 0.97 (0.95-0.99)               | 0.006        | Age (per year)                                                                  | 0.98 (0.96-0.99) | 0.017    |
| Vascular risk factors (number)                                  | 0.99 (0.84-1.16)               | 0.89         | Diabetes mellitus                                                               | 0.38 (0.16-0.92) | 0.032    |
|                                                                 |                                |              | Baseline hemoglobin (per g/L increase)                                          | 1.02 (1.00-1.03) | 0.043    |
| <b>AUC (95%CI)</b>                                              | 0.76 (0.70-0.82)               | P<0.0001     |                                                                                 | 0.76 (0.70-0.82) | P<0.0001 |
| <b>Pearson X<sup>2</sup></b>                                    | 703                            | P=1.00       |                                                                                 | 686              | P=1.00   |
| <b>B. TREATMENT/POST-TREATMENT FACTORS</b>                      |                                |              |                                                                                 |                  |          |
| Stroke progression                                              | 0.03 (0.01-0.14)               | <0.001       | Stroke progression                                                              | 0.05 (0.01-0.25) | <0.001   |
| sICH                                                            | 0.09 (0.02-0.49)               | 0.006        | sICH                                                                            | 0.15 (0.03-0.84) | 0.031    |
| Pneumonia                                                       | No mismatch case had pneumonia | n=40 dropped | DBP at 24-hours (per mmHg increase)                                             | 0.97 (0.94-0.99) | 0.003    |
|                                                                 |                                |              | Glucose at 24-hours (per mM increase)                                           | 0.82 (0.69-0.96) | 0.016    |
|                                                                 |                                |              | Hemoglobin at 24-hours (per g/L increase)                                       | 1.02 (1.01-1.04) | 0.009    |
| <b>AUC (95%CI)</b>                                              | 0.85 (0.80-0.90)               | P<0.0001     |                                                                                 | 0.79 (0.72-0.86) | P<0.0001 |
| <b>Pearson X<sup>2</sup></b>                                    | 822                            | P=0.86       |                                                                                 | 725              | P=0.93   |
| <b>Hosmer-Lemeshow X<sup>2</sup></b>                            | 22.5                           | P=0.65       |                                                                                 | 3.17             | P=0.37   |

No difference in AUC between pre-treatment factor models 1 and 2, P=0.90.

AUC superior for treatment/post-treatment factor model 1 vs 2, p=0.030.

aOR=adjusted odds ratio; AUC=Area under the receiver-operating-characteristics curve; CI=confidence interval; DBP=diastolic blood pressure; mRS=modified Rankin Scale score; FIV=follow-up infarct volume; sICH=symptomatic intracerebral hemorrhage



**eTable 11. Comparison of Prespecified and Stepwise Multivariable Logistic Regression Models for the Association of Pretreatment Variables Among 1091 Patients and Treatment-Related or Posttreatment Variables Among 1082 Patients for the Outcome of mRS Score of 3 or Less Despite FIV of 92 mL or Greater in the ESCAPE-NA1 Trial**

All models were also adjusted for FIV, alteplase, nerinetide, and interaction of alteplase with nerinetide treatment.

| Outcome: FIV≥92mL & mRS≤3                                       |                   |          |                                                                                 |                   |          |
|-----------------------------------------------------------------|-------------------|----------|---------------------------------------------------------------------------------|-------------------|----------|
| (1) Model with pre-specified variables based on ESCAPE analysis |                   |          | (2) Model with variables selected by stepwise multivariable logistic regression |                   |          |
| Variable                                                        | aOR(95%CI)        | P> z     | Variable                                                                        | aOR(95%CI)        | P> z     |
| <b>A. PRE-TREATMENT FACTORS</b>                                 |                   |          |                                                                                 |                   |          |
| Age (per year)                                                  | 0.97 (0.96-0.99)  | 0.002    | Age (per year)                                                                  | 0.98 (0.96-0.99)  | 0.002    |
| Vascular risk factors (number)                                  | 1.02 (0.89-1.15)  | 0.82     | Diabetes mellitus                                                               | 0.66 (0.37-1.19)  | 0.17     |
| <b>AUC (95%CI)</b>                                              | 0.81 (0.78-0.84)  | P<0.0001 |                                                                                 | 0.82 (0.79-0.85)  | P<0.0001 |
| <b>Pearson X<sup>2</sup></b>                                    | 688               | P=0.99   |                                                                                 | 663               | P=1.00   |
| <b>Hosmer-Lemeshow X<sup>2</sup></b>                            | 7.05              | P=0.07   |                                                                                 | 4.93              | P=0.18   |
| <b>B. TREATMENT/POST-TREATMENT FACTORS</b>                      |                   |          |                                                                                 |                   |          |
| Stroke progression                                              | 0.02 (0.004-0.07) | <0.001   | Stroke progression                                                              | 0.01 (0.002-0.06) | <0.001   |
| slCH                                                            | 0.08 (0.02-0.33)  | 0.001    | slCH                                                                            | 0.07 (0.02-0.31)  | <0.001   |
| Pneumonia                                                       | 0.07 (0.01-0.62)  | 0.017    | Pneumonia                                                                       | 0.07 (0.01-0.64)  | 0.018    |
|                                                                 |                   |          | SBP at 24 hours (per mmHg increase)                                             | 0.99 (0.98-1.00)  | 0.090    |
| <b>AUC (95%CI)</b>                                              | 0.86 (0.82-0.91)  | P<0.0001 |                                                                                 | 0.87 (0.83-0.91)  | P<0.0001 |
| <b>Pearson X<sup>2</sup></b>                                    | 149.2             | P=0.99   |                                                                                 | 168.8             | P=0.97   |
| <b>Hosmer-Lemeshow X<sup>2</sup></b>                            | 5.69              | P=0.13   |                                                                                 | 6.39              | P=0.094  |

No difference in AUC between pre-treatment factor models 1 and 2, P=0.29.

No difference in AUC between post-treatment factor models 1 and 2, P=0.67.

aOR=adjusted odds ratio; AUC=Area under the receiver-operating-characteristics curve; CI=confidence interval; mRS=modified Rankin Scale score; FIV=follow-up infarct volume; SAE=serious adverse event; SBP=systolic blood pressure; slCH=symptomatic intracerebral hemorrhage

**eTable 12. Comparison of Prespecified and Stepwise Multivariable Logistic Regression Models for the Association Treatment-Related or Posttreatment Variables Among 924 Patients for the Outcome of mRS Score of 2 or Less Despite FIV of 92 mL or Greater in the ESCAPE-NA1 Trial With 24-Hour or 48-hour NIHSS Included as a Posttreatment Variable**

In this iteration, we permitted the 24- or 48-hour NIHSS to be included as a post-treatment variable. All models were also adjusted for FIV, alteplase, nerinetide, and interaction of alteplase with nerinetide treatment.

| Outcome: FIV≥92mL & mRS≤2                                       |                                |              |                                                                                 |                   |          |
|-----------------------------------------------------------------|--------------------------------|--------------|---------------------------------------------------------------------------------|-------------------|----------|
| (1) Model with pre-specified variables based on ESCAPE analysis |                                |              | (2) Model with variables selected by stepwise multivariable logistic regression |                   |          |
| Variable                                                        | aOR(95%CI)                     | P> z         | Variable                                                                        | aOR(95%CI)        | P> z     |
| Stroke Progression                                              | 0.05 (0.006-0.41)              | 0.005        | Stroke progression                                                              | 0.06 (0.01-0.44)  | 0.006    |
| sICH                                                            | 0.13 (0.02-0.86)               | 0.034        | sICH                                                                            | 0.22 (0.03-1.39)  | 0.11     |
| Pneumonia                                                       | No mismatch case had pneumonia | n=38 dropped | SBP at 24-hours (per mmHg increase)                                             | 0.98 (0.96-0.996) | 0.015    |
| 48-hour NIHSS (per unit increase)                               | 0.82 (0.77-0.88)               | <0.001       | 48-hour NIHSS (per unit increase)                                               | 0.83 (0.78-0.90)  | <0.001   |
|                                                                 |                                |              | Hemoglobin at 24-hours (per g/L increase)                                       | 1.02 (1.004-1.04) | 0.014    |
|                                                                 |                                |              |                                                                                 |                   |          |
| <b>AUC (95%CI)</b>                                              | 0.85 (0.78-0.92)               | P<0.0001     |                                                                                 | 0.83 (0.76-0.90)  | P<0.0001 |
| <b>Pearson X<sup>2</sup></b>                                    | 119.6                          | P=0.996      |                                                                                 | 156.2             | P=0.70   |
| <b>Hosmer-Lemeshow X<sup>2</sup></b>                            | 4.75                           | P=0.19       |                                                                                 | 1.68              | P=0.82   |

No difference in AUC between post-treatment models 1 and 2, p=0.078.

aOR=adjusted odds ratio; AUC=Area under the receiver-operating-characteristics curve; CI=confidence interval; INT=Infarct in New Territory; mRS=modified Rankin Scale score; NIHSS=National Institutes of Health Stroke Scale score; FIV=follow-up infarct volume; SBP=systolic blood pressure; sICH=symptomatic intracerebral hemorrhage.

**eFigure 1.** Proportions of Patients in the ESCAPE-NA1 Trial With Discrepancies Between FIV and 90-day mRS Score, Based on the Definitions Used in this Study

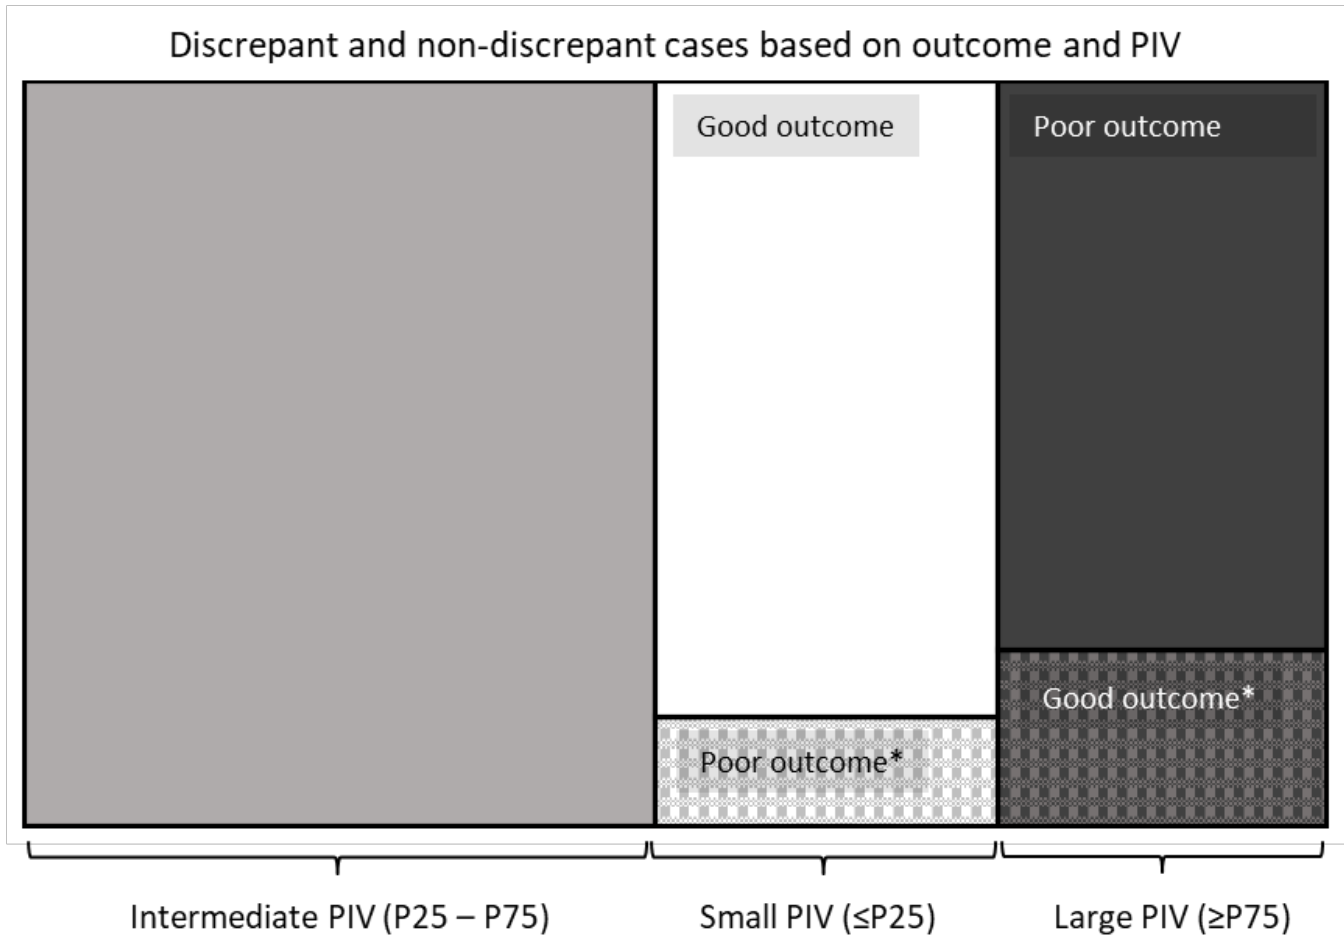

\* Stippled areas indicate the discrepant cases

**eFigure 2.** Proportion of Patients in Each Age Group With 90-Day mRS Score of 3 or Greater Despite Small FIV and mRS Score of 2 or Less Despite Large FIV

**A. mRS $\geq$ 3 despite PIV $\leq$ 7mL**

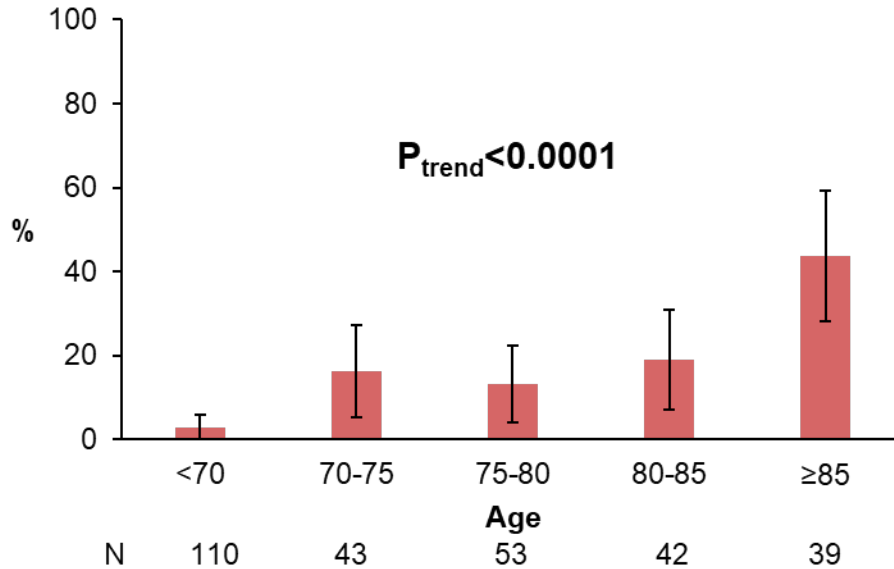

**B. mRS $\leq$ 2 despite PIV $\geq$ 92mL**

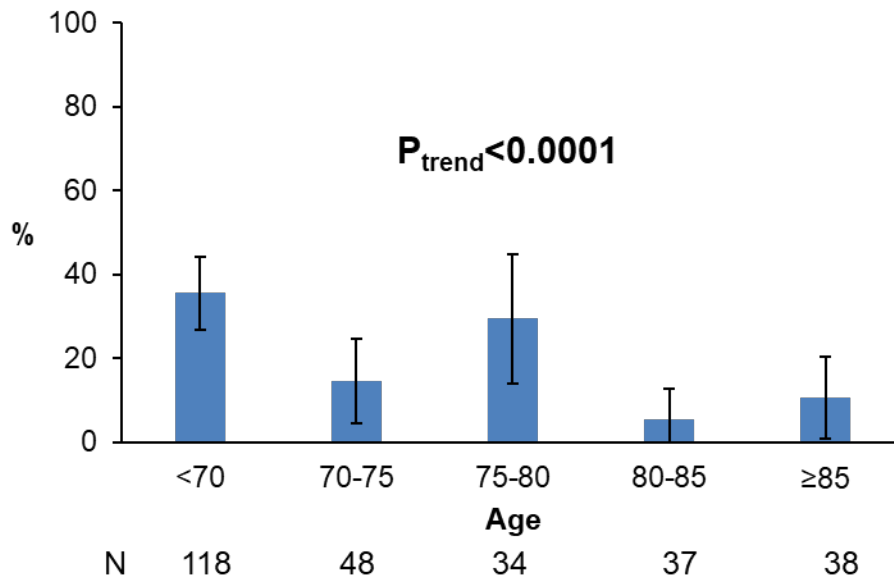

Bars represent 95% confidence intervals. The total number of individuals in each group is shown below each graph. P-values are from the Fisher's exact test. Older patients were more likely to have a poor functional outcome despite a small FIV, whereas younger patients were more likely to have a good outcome despite a large FIV.
