# Supplementary material for: Assessment of Discrepancies Between Follow-up Infarct Volume and 90-Day Outcomes Among Patients With Ischemic Stroke Who Received Endovascular Therapy
Source: PubMed Central journal article supplement (PMC8571657; doi:10.1001/jamanetworkopen.2021.32376), 2021-11-05
Supplement: jamanetwopen-e2132376-s002.pdf [file jamanetwopen-e2132376-s002.pdf]

\*Indicates required information. Only first name, last name, and suffix will appear in PubMed.

| <b>*Group Name(s): ESCAPE-NA1 Trial Investigators</b> |                   |                              |                  |                                                 |                                          |                                                         |                                                                                            |
|-------------------------------------------------------|-------------------|------------------------------|------------------|-------------------------------------------------|------------------------------------------|---------------------------------------------------------|--------------------------------------------------------------------------------------------|
| <b>*First Name and Middle Initial(s)</b>              | <b>*Last Name</b> | <b>*Suffix (eg, Jr, III)</b> | Academic Degrees | Institution                                     | Location (city, state/province, country) | Role or Contribution, eg, chair, principal investigator | Group (if more than 1 Group listed in the byline and/or Subgroup (eg, Steering Committee)) |
| Philip A.                                             | Barber            |                              | MD               | Foothills Medical Centre, University of Calgary | Calgary, AB, Canada                      | Collaborator                                            |                                                                                            |
| Eric E.                                               | Smith             |                              | MD               | Foothills Medical Centre, University of Calgary | Calgary, AB, Canada                      | Collaborator                                            |                                                                                            |
| Simerpreet                                            | Bal               |                              | MD               | Foothills Medical Centre, University of Calgary | Calgary, AB, Canada                      | Collaborator                                            |                                                                                            |
| Suresh                                                | Subramanian       |                              | MD               | Foothills Medical Centre, University of Calgary | Calgary, AB, Canada                      | Collaborator                                            |                                                                                            |
| Steven                                                | Peters            |                              | MD               | Foothills Medical Centre, University of Calgary | Calgary, AB, Canada                      | Collaborator                                            |                                                                                            |
| Philippe                                              | Couillard         |                              | MD               | Foothills Medical Centre, University of Calgary | Calgary, AB, Canada                      | Collaborator                                            |                                                                                            |
| Gary                                                  | Klein             |                              | MD               | Foothills Medical Centre, University of Calgary | Calgary, AB, Canada                      | Collaborator                                            |                                                                                            |
| Peter                                                 | Stys              |                              | MD               | Foothills Medical Centre, University of Calgary | Calgary, AB, Canada                      | Collaborator                                            |                                                                                            |
| Shelagh B.                                            | Coutts            |                              | MD               | Foothills Medical Centre, University of Calgary | Calgary, AB, Canada                      | Collaborator                                            |                                                                                            |
| John                                                  | Wong              |                              | MD               | Foothills Medical Centre, University of Calgary | Calgary, AB, Canada                      | Collaborator                                            |                                                                                            |
| Alim                                                  | Mitha             |                              | MD               | Foothills Medical Centre, University of Calgary | Calgary, AB, Canada                      | Collaborator                                            |                                                                                            |
| Muneer                                                | Eesa              |                              | MD               | Foothills Medical Centre, University of Calgary | Calgary, AB, Canada                      | Collaborator                                            |                                                                                            |
| William                                               | Morrish           |                              | MD               | Foothills Medical Centre, University of Calgary | Calgary, AB, Canada                      | Collaborator                                            |                                                                                            |
| Saad                                                  | Alqatani          |                              | MD               | Foothills Medical Centre, University of Calgary | Calgary, AB, Canada                      | Collaborator                                            |                                                                                            |
| Nima                                                  | Kashani           |                              | MD               | Foothills Medical Centre, University of Calgary | Calgary, AB, Canada                      | Collaborator                                            |                                                                                            |
| Prasanna                                              | Venkatesan        |                              | MD               | Foothills Medical Centre, University of Calgary | Calgary, AB, Canada                      | Collaborator                                            |                                                                                            |
| Ericka                                                | Teleg             |                              | MD               | Foothills Medical Centre, University of Calgary | Calgary, AB, Canada                      | Collaborator                                            |                                                                                            |

## Supplemental Online Content: Nonauthor Collaborators

\*Indicates required information. Only first name, last name, and suffix will appear in PubMed.

| *First Name and Middle Initial(s) | *Last Name  | *Suffix (eg, Jr, III) | Academic Degrees | Institution                                     | Location (city, state/province, country) | Role or Contribution, eg, chair, principal investigator | Group (if more than 1 Group listed in the byline and/or Subgroup (eg, Steering Committee)) |
|-----------------------------------|-------------|-----------------------|------------------|-------------------------------------------------|------------------------------------------|---------------------------------------------------------|--------------------------------------------------------------------------------------------|
| Amith                             | Sitaram     |                       | MD               | Foothills Medical Centre, University of Calgary | Calgary, AB, Canada                      | Collaborator                                            |                                                                                            |
| Brett                             | Graham      |                       | MD               | Foothills Medical Centre, University of Calgary | Calgary, AB, Canada                      | Collaborator                                            |                                                                                            |
| Stephen van                       | Gaal        |                       | MD               | Foothills Medical Centre, University of Calgary | Calgary, AB, Canada                      | Collaborator                                            |                                                                                            |
| Aimen                             | Moussaddy   |                       | MD               | Foothills Medical Centre, University of Calgary | Calgary, AB, Canada                      | Collaborator                                            |                                                                                            |
| Debabrata                         | Chakraborty |                       | MD               | Foothills Medical Centre, University of Calgary | Calgary, AB, Canada                      | Collaborator                                            |                                                                                            |
| Nicholar                          | Maraj       |                       | MD               | Foothills Medical Centre, University of Calgary | Calgary, AB, Canada                      | Collaborator                                            |                                                                                            |
| Andrew                            | Lockey      |                       | MD               | Foothills Medical Centre, University of Calgary | Calgary, AB, Canada                      | Collaborator                                            |                                                                                            |
| Shuo                              | Chen        |                       | MD               | Foothills Medical Centre, University of Calgary | Calgary, AB, Canada                      | Collaborator                                            |                                                                                            |
| Ravinder                          | Singh       |                       | MD               | Foothills Medical Centre, University of Calgary | Calgary, AB, Canada                      | Collaborator                                            |                                                                                            |
| Abdulaziz Sulaiman                | Alsultan    |                       | MD               | Foothills Medical Centre, University of Calgary | Calgary, AB, Canada                      | Collaborator                                            |                                                                                            |
| Ria                               | Asunsian    |                       | MD               | Foothills Medical Centre, University of Calgary | Calgary, AB, Canada                      | Collaborator                                            |                                                                                            |
| Dominic                           | Tse         |                       | MD               | Foothills Medical Centre, University of Calgary | Calgary, AB, Canada                      | Collaborator                                            |                                                                                            |
| Darshan                           | Doshi       |                       | MD               | Foothills Medical Centre, University of Calgary | Calgary, AB, Canada                      | Collaborator                                            |                                                                                            |
| Ondrej                            | Volny       |                       | MD               | Foothills Medical Centre, University of Calgary | Calgary, AB, Canada                      | Collaborator                                            |                                                                                            |
| Piyush                            | Ojha        |                       | MD               | Foothills Medical Centre, University of Calgary | Calgary, AB, Canada                      | Collaborator                                            |                                                                                            |
| Ankur                             | Wadhwa      |                       | MD               | Foothills Medical Centre, University of Calgary | Calgary, AB, Canada                      | Collaborator                                            |                                                                                            |
| Martha                            | Marko       |                       | MD               | Foothills Medical Centre, University of Calgary | Calgary, AB, Canada                      | Collaborator                                            |                                                                                            |
| Nishita                           | Singh       |                       | MD               | Foothills Medical Centre, University of Calgary | Calgary, AB, Canada                      | Collaborator                                            |                                                                                            |

Supplemental Online Content: Nonauthor Collaborators

\*Indicates required information. Only first name, last name, and suffix will appear in PubMed.

| *First Name and Middle Initial(s) | *Last Name  | *Suffix (eg, Jr, III) | Academic Degrees | Institution                                     | Location (city, state/province, country) | Role or Contribution, eg, chair, principal investigator | Group (if more than 1 Group listed in the byline and/or Subgroup (eg, Steering Committee)) |
|-----------------------------------|-------------|-----------------------|------------------|-------------------------------------------------|------------------------------------------|---------------------------------------------------------|--------------------------------------------------------------------------------------------|
| Sanchea                           | Wasyliw     |                       | MD               | Foothills Medical Centre, University of Calgary | Calgary, AB, Canada                      | Collaborator                                            |                                                                                            |
| Karla J.                          | Ryckborst   |                       | RN               | Foothills Medical Centre, University of Calgary | Calgary, AB, Canada                      | Collaborator                                            |                                                                                            |
| Carol                             | Kenney      |                       | RN               | Foothills Medical Centre, University of Calgary | Calgary, AB, Canada                      | Collaborator                                            |                                                                                            |
| Supriya                           | Save        |                       |                  | Foothills Medical Centre, University of Calgary | Calgary, AB, Canada                      | Collaborator                                            |                                                                                            |
| Anitha                            | Jambula     |                       |                  | Foothills Medical Centre, University of Calgary | Calgary, AB, Canada                      | Collaborator                                            |                                                                                            |
| Nancy                             | Newcommon   |                       |                  | Foothills Medical Centre, University of Calgary | Calgary, AB, Canada                      | Collaborator                                            |                                                                                            |
| Gavin                             | Hull        |                       |                  | Foothills Medical Centre, University of Calgary | Calgary, AB, Canada                      | Collaborator                                            |                                                                                            |
| Darcy                             | Blackstock  |                       |                  | Foothills Medical Centre, University of Calgary | Calgary, AB, Canada                      | Collaborator                                            |                                                                                            |
| Sharon                            | Kiszcak     |                       |                  | Foothills Medical Centre, University of Calgary | Calgary, AB, Canada                      | Collaborator                                            |                                                                                            |
| Leslie                            | Zimmel      |                       |                  | Foothills Medical Centre, University of Calgary | Calgary, AB, Canada                      | Collaborator                                            |                                                                                            |
| Michelle                          | Wright      |                       |                  | Foothills Medical Centre, University of Calgary | Calgary, AB, Canada                      | Collaborator                                            |                                                                                            |
| Cari                              | Jahraus     |                       |                  | Foothills Medical Centre, University of Calgary | Calgary, AB, Canada                      | Collaborator                                            |                                                                                            |
| Linda                             | Andersen    |                       |                  | Foothills Medical Centre, University of Calgary | Calgary, AB, Canada                      | Collaborator                                            |                                                                                            |
| Shelly                            | Bohn        |                       |                  | Foothills Medical Centre, University of Calgary | Calgary, AB, Canada                      | Collaborator                                            |                                                                                            |
| Joseph                            | Paul        |                       |                  | Foothills Medical Centre, University of Calgary | Calgary, AB, Canada                      | Collaborator                                            |                                                                                            |
|                                   |             |                       |                  |                                                 |                                          |                                                         |                                                                                            |
| Brian H.                          | Buck        |                       | MD               | University of Alberta Hospital                  | Edmonton, AB, Canada                     | Site PI                                                 |                                                                                            |
| Kenneth S.                        | Butcher     |                       | MD               | University of Alberta Hospital                  | Edmonton, AB, Canada                     | Site PI                                                 |                                                                                            |
| Ashfaq                            | Shuaib      |                       | MD               | University of Alberta Hospital                  | Edmonton, AB, Canada                     | Collaborator                                            |                                                                                            |
| Tom                               | Jeerakathil |                       | MD               | University of Alberta Hospital                  | Edmonton, AB, Canada                     | Collaborator                                            |                                                                                            |
| Glen                              | Jickling    |                       | MD               | University of Alberta Hospital                  | Edmonton, AB, Canada                     | Collaborator                                            |                                                                                            |

## Supplemental Online Content: Nonauthor Collaborators

\*Indicates required information. Only first name, last name, and suffix will appear in PubMed.

| *First Name and Middle Initial(s) | *Last Name       | *Suffix (eg, Jr, III) | Academic Degrees | Institution                                                    | Location (city, state/province, country) | Role or Contribution, eg, chair, principal investigator | Group (if more than 1 Group listed in the byline and/or Subgroup (eg, Steering Committee)) |
|-----------------------------------|------------------|-----------------------|------------------|----------------------------------------------------------------|------------------------------------------|---------------------------------------------------------|--------------------------------------------------------------------------------------------|
| Derek J.                          | Emery            |                       | MD               | University of Alberta Hospital                                 | Edmonton, AB, Canada                     | Collaborator                                            |                                                                                            |
| Jeremy                            | Rempel           |                       | MD               | University of Alberta Hospital                                 | Edmonton, AB, Canada                     | Collaborator                                            |                                                                                            |
| Richard J.                        | Ower             |                       | MD               | University of Alberta Hospital                                 | Edmonton, AB, Canada                     | Collaborator                                            |                                                                                            |
| Robert                            | Ashforth         |                       | MD               | University of Alberta Hospital                                 | Edmonton, AB, Canada                     | Collaborator                                            |                                                                                            |
| Tom                               | Yeo              |                       | MD               | University of Alberta Hospital                                 | Edmonton, AB, Canada                     | Collaborator                                            |                                                                                            |
| Trevor B.                         | Kotylak          |                       | MD               | University of Alberta Hospital                                 | Edmonton, AB, Canada                     | Collaborator                                            |                                                                                            |
| Cian                              | O;Kelly          |                       | MD               | University of Alberta Hospital                                 | Edmonton, AB, Canada                     | Collaborator                                            |                                                                                            |
| Michael                           | Chow             |                       | MD               | University of Alberta Hospital                                 | Edmonton, AB, Canada                     | Collaborator                                            |                                                                                            |
| Mizaffar                          | Siddiqui         |                       | MD               | University of Alberta Hospital                                 | Edmonton, AB, Canada                     | Collaborator                                            |                                                                                            |
| Maher                             | Saqqur           |                       | MD               | University of Alberta Hospital                                 | Edmonton, AB, Canada                     | Collaborator                                            |                                                                                            |
| Atlantic                          | D'Souza          |                       | MD               | University of Alberta Hospital                                 | Edmonton, AB, Canada                     | Collaborator                                            |                                                                                            |
| Mar                               | Lloret           |                       | MD               | University of Alberta Hospital                                 | Edmonton, AB, Canada                     | Collaborator                                            |                                                                                            |
| Asif                              | Butt             |                       | MD               | University of Alberta Hospital                                 | Edmonton, AB, Canada                     | Collaborator                                            |                                                                                            |
| Ali                               | Nomani           |                       | MD               | University of Alberta Hospital                                 | Edmonton, AB, Canada                     | Collaborator                                            |                                                                                            |
| Hayrapet                          | Kalashyan        |                       | MD               | University of Alberta Hospital                                 | Edmonton, AB, Canada                     | Collaborator                                            |                                                                                            |
| Sibi                              | Thirunavukkarasu |                       | MD               | University of Alberta Hospital                                 | Edmonton, AB, Canada                     | Collaborator                                            |                                                                                            |
| Juline                            | Jabs             |                       | RN               | University of Alberta Hospital                                 | Edmonton, AB, Canada                     | Collaborator                                            |                                                                                            |
| Paige                             | Fairall          |                       |                  | University of Alberta Hospital                                 | Edmonton, AB, Canada                     | Collaborator                                            |                                                                                            |
| Lori                              | Piquette         |                       | RN               | University of Alberta Hospital                                 | Edmonton, AB, Canada                     | Collaborator                                            |                                                                                            |
|                                   |                  |                       |                  |                                                                |                                          |                                                         |                                                                                            |
| Stephen J.                        | Phillips         |                       | MBBS FRCPC       | Queen Elizabeth II Health Science Centre, Dalhousie University | Halifax, NS, Canada                      | Site PI                                                 |                                                                                            |
| A. Laine                          | Green            |                       | MD, FRCPC        | Queen Elizabeth II Health Science Centre, Dalhousie University | Halifax, NS, Canada                      | Collaborator                                            |                                                                                            |
| Gordon J.                         | Gubitz           |                       | MD, FRCPC        | Queen Elizabeth II Health Science Centre, Dalhousie University | Halifax, NS, Canada                      | Collaborator                                            |                                                                                            |
| Jens O.                           | Heidenreich      |                       | MD               | Queen Elizabeth II Health Science Centre, Dalhousie University | Halifax, NS, Canada                      | Collaborator                                            |                                                                                            |
| Thien                             | Huynh            |                       | MD, FRCPC        | Queen Elizabeth II Health Science Centre, Dalhousie University | Halifax, NS, Canada                      | Collaborator                                            |                                                                                            |
| Jai J. S.                         | Shankar          |                       | MD, FRCPC        | Queen Elizabeth II Health Science Centre, Dalhousie University | Halifax, NS, Canada                      | Collaborator                                            |                                                                                            |
| William J.                        | Maloney          |                       | MD, FRCPC        | Queen Elizabeth II Health Science Centre, Dalhousie University | Halifax, NS, Canada                      | Collaborator                                            |                                                                                            |
| Robert                            | Vandorpe         |                       | MD, FRCPC        | Queen Elizabeth II Health Science Centre, Dalhousie University | Halifax, NS, Canada                      | Collaborator                                            |                                                                                            |

Supplemental Online Content: Nonauthor Collaborators

\*Indicates required information. Only first name, last name, and suffix will appear in PubMed.

| *First Name and Middle Initial(s) | *Last Name     | *Suffix (eg, Jr, III) | Academic Degrees | Institution                                                    | Location (city, state/province, country) | Role or Contribution, eg, chair, principal investigator | Group (if more than 1 Group listed in the byline and/or Subgroup (eg, Steering Committee)) |
|-----------------------------------|----------------|-----------------------|------------------|----------------------------------------------------------------|------------------------------------------|---------------------------------------------------------|--------------------------------------------------------------------------------------------|
| Matthias H.                       | Schmidt        |                       | MD, FRCPC        | Queen Elizabeth II Health Science Centre, Dalhousie University | Halifax, NS, Canada                      | Collaborator                                            |                                                                                            |
| Gwynedd E.                        | Pickett        |                       | MD, FRCSC        | Queen Elizabeth II Health Science Centre, Dalhousie University | Halifax, NS, Canada                      | Collaborator                                            |                                                                                            |
| Adrienne                          | Weeks          |                       | MD, PhD, FRCSC   | Queen Elizabeth II Health Science Centre, Dalhousie University | Halifax, NS, Canada                      | Collaborator                                            |                                                                                            |
| Juditch                           | Jarrett        |                       | RN, CCRP         | Queen Elizabeth II Health Science Centre, Dalhousie University | Halifax, NS, Canada                      | Collaborator                                            |                                                                                            |
| Debbie                            | MacDonald      |                       | RN, CCRP         | Queen Elizabeth II Health Science Centre, Dalhousie University | Halifax, NS, Canada                      | Collaborator                                            |                                                                                            |
| Joanna                            | Arsenault      |                       | CRP              | Queen Elizabeth II Health Science Centre, Dalhousie University | Halifax, NS, Canada                      | Collaborator                                            |                                                                                            |
| Ruth                              | Kinnear        |                       | RN               | Queen Elizabeth II Health Science Centre, Dalhousie University | Halifax, NS, Canada                      | Collaborator                                            |                                                                                            |
|                                   |                |                       |                  |                                                                |                                          |                                                         |                                                                                            |
| Jennifer L.                       | Mandzia        |                       | MD, PhD          | London Health Science Centre, Western Univer                   | London, ON, Canada                       | Site PI                                                 |                                                                                            |
| Michael                           | Mayich         |                       | MD               | London Health Science Centre, Western Univer                   | London, ON, Canada                       | Site PI                                                 |                                                                                            |
| Melfort                           | Boulton        |                       | MD, PhD          | London Health Science Centre, Western Univer                   | London, ON, Canada                       | Collaborator                                            |                                                                                            |
| Maria Bres                        | Bullrich       |                       | MD               | London Health Science Centre, Western Univer                   | London, ON, Canada                       | Collaborator                                            |                                                                                            |
| Sebastian                         | Fridman        |                       | MD               | London Health Science Centre, Western Univer                   | London, ON, Canada                       | Collaborator                                            |                                                                                            |
| Ruba                              | Kiwan          |                       | MD               | London Health Science Centre, Western Univer                   | London, ON, Canada                       | Collaborator                                            |                                                                                            |
| Donald                            | Lee            |                       | MD               | London Health Science Centre, Western Univer                   | London, ON, Canada                       | Collaborator                                            |                                                                                            |
| Stephen                           | Lownie         |                       | MD               | London Health Science Centre, Western Univer                   | London, ON, Canada                       | Collaborator                                            |                                                                                            |
| Alexander V.                      | Khaw           |                       | MD               | London Health Science Centre, Western Univer                   | London, ON, Canada                       | Collaborator                                            |                                                                                            |
| Sachin K.                         | Pandey         |                       | MD               | London Health Science Centre, Western Univer                   | London, ON, Canada                       | Collaborator                                            |                                                                                            |
| Manas                             | Sharma         |                       | MD               | London Health Science Centre, Western Univer                   | London, ON, Canada                       | Collaborator                                            |                                                                                            |
| Luciano A.                        | Sposato        |                       | MD               | London Health Science Centre, Western Univer                   | London, ON, Canada                       | Collaborator                                            |                                                                                            |
| Kevin                             | Wade           |                       | MD               | London Health Science Centre, Western Univer                   | London, ON, Canada                       | Collaborator                                            |                                                                                            |
| Beth                              | Beauchamp      |                       | RN               | London Health Science Centre, Western Univer                   | London, ON, Canada                       | Collaborator                                            |                                                                                            |
| Lindsay                           | Lambourn       |                       | RN               | London Health Science Centre, Western Univer                   | London, ON, Canada                       | Collaborator                                            |                                                                                            |
| Belinda                           | Amato-Marziali |                       |                  | London Health Science Centre, Western Univer                   | London, ON, Canada                       | Collaborator                                            |                                                                                            |
|                                   |                |                       |                  |                                                                |                                          |                                                         |                                                                                            |
| Daniel                            | Roy            |                       | MD               | CHUM                                                           | Montreal, QC, Canada                     | Site PI                                                 |                                                                                            |
| Nicole                            | Deneault       |                       | MD               | CHUM                                                           | Montreal, QC, Canada                     | Collaborator                                            |                                                                                            |
| Yan                               | Deschaintre    |                       | MD               | CHUM                                                           | Montreal, QC, Canada                     | Collaborator                                            |                                                                                            |
| Laura C.                          | Gioia          |                       | MD               | CHUM                                                           | Montreal, QC, Canada                     | Collaborator                                            |                                                                                            |

## Supplemental Online Content: Nonauthor Collaborators

\*Indicates required information. Only first name, last name, and suffix will appear in PubMed.

| *First Name and Middle Initial(s) | *Last Name | *Suffix (eg, Jr, III) | Academic Degrees | Institution                                        | Location (city, state/province, country) | Role or Contribution, eg, chair, principal investigator | Group (if more than 1 Group listed in the byline and/or Subgroup (eg, Steering Committee)) |
|-----------------------------------|------------|-----------------------|------------------|----------------------------------------------------|------------------------------------------|---------------------------------------------------------|--------------------------------------------------------------------------------------------|
| Grégory                           | Jacquin    |                       | MD               | CHUM                                               | Montreal, QC, Canada                     | Collaborator                                            |                                                                                            |
| Céline                            | Odier      |                       | MD               | CHUM                                               | Montreal, QC, Canada                     | Collaborator                                            |                                                                                            |
| Christian                         | Stapf      |                       | MD, INR          | CHUM                                               | Montreal, QC, Canada                     | Collaborator                                            |                                                                                            |
| Daniela                           | Iancu      |                       | MD               | CHUM                                               | Montreal, QC, Canada                     | Collaborator                                            |                                                                                            |
| Jean                              | Raymond    |                       | MD               | CHUM                                               | Montreal, QC, Canada                     | Collaborator                                            |                                                                                            |
| Alain                             | Weill      |                       | MD               | CHUM                                               | Montreal, QC, Canada                     | Collaborator                                            |                                                                                            |
| Marlène                           | Lapierre   |                       | BSc              | CHUM                                               | Montreal, QC, Canada                     | Research Nurse Coordinator                              |                                                                                            |
| Nadia                             | Jadil      |                       |                  | CHUM                                               | Montreal, QC, Canada                     | Research administrative assistant                       |                                                                                            |
| Judlène                           | Jolteus    |                       | Bsc              | CHUM                                               | Montreal, QC, Canada                     | Clinical Stroke Nurse                                   |                                                                                            |
| Jeanne                            | Teitelbaum |                       | MD               | Montreal Neurological Institute, McGill University | Montreal, QC, Canada                     | Site PI                                                 |                                                                                            |
| Mark                              | Angle      |                       | MD               | Montreal Neurological Institute, McGill University | Montreal, QC, Canada                     | Collaborator                                            |                                                                                            |
| Mathew                            | Hannouche  |                       | MD               | Montreal Neurological Institute, McGill University | Montreal, QC, Canada                     | Collaborator                                            |                                                                                            |
| Mohamed                           | Badawy     |                       | MD               | Montreal Neurological Institute, McGill University | Montreal, QC, Canada                     | Collaborator                                            |                                                                                            |
| Justin                            | Letourneau |                       | MD               | Montreal Neurological Institute, McGill University | Montreal, QC, Canada                     | Collaborator                                            |                                                                                            |
| Maria                             | Cortes     |                       | MD               | Montreal Neurological Institute, McGill University | Montreal, QC, Canada                     | Collaborator                                            |                                                                                            |
| Grant                             | Linnell    |                       | Md               | Montreal Neurological Institute, McGill University | Montreal, QC, Canada                     | Collaborator                                            |                                                                                            |
| Donatella                         | Tampieri   |                       | MD               | Montreal Neurological Institute, McGill University | Montreal, QC, Canada                     | Collaborator                                            |                                                                                            |
| Lucy                              | Vieira     |                       | MD               | Montreal Neurological Institute, McGill University | Montreal, QC, Canada                     | Collaborator                                            |                                                                                            |
| Aimen                             | Moussaddy  |                       | MD               | Montreal Neurological Institute, McGill University | Montreal, QC, Canada                     | Collaborator                                            |                                                                                            |
| Catherine                         | Legault    |                       | MD               | Montreal Neurological Institute, McGill University | Montreal, QC, Canada                     | Collaborator                                            |                                                                                            |
| Liam                              | Durcan     |                       | MD               | Montreal Neurological Institute, McGill University | Montreal, QC, Canada                     | Collaborator                                            |                                                                                            |
| Angela                            | Moore      |                       | MSc              | Montreal Neurological Institute, McGill University | Montreal, QC, Canada                     | Collaborator                                            |                                                                                            |
| Erin                              | Cole       |                       | MSc              | Montreal Neurological Institute, McGill University | Montreal, QC, Canada                     | Collaborator                                            |                                                                                            |
| Claire                            | Magnussen  |                       | PhD              | Montreal Neurological Institute, McGill University | Montreal, QC, Canada                     | Collaborator                                            |                                                                                            |
| Kristiana                         | Salmon     |                       | EMBA             | Montreal Neurological Institute, McGill University | Montreal, QC, Canada                     | Collaborator                                            |                                                                                            |
| Salma                             | Khalil     |                       | MSc              | Montreal Neurological Institute, McGill University | Montreal, QC, Canada                     | Collaborator                                            |                                                                                            |
| Isabelle                          | Desloges   |                       | MSc              | Montreal Neurological Institute, McGill University | Montreal, QC, Canada                     | Collaborator                                            |                                                                                            |
| Lindsay                           | Waxman     |                       | MSc              | Montreal Neurological Institute, McGill University | Montreal, QC, Canada                     | Collaborator                                            |                                                                                            |
| Wynne                             | Abdon      |                       | BScN             | Montreal Neurological Institute, McGill University | Montreal, QC, Canada                     | Collaborator                                            |                                                                                            |
| Sonia                             | Lai        |                       | BSc              | Montreal Neurological Institute, McGill University | Montreal, QC, Canada                     | Collaborator                                            |                                                                                            |
| Dar                               | Dowlatsahi |                       | PhD              | Ottawa Hospital, University of Ottawa              | Ottawa, ON, Canada                       | Site PI                                                 |                                                                                            |
| Daniela                           | Iancu      |                       | MSc              | Ottawa Hospital, University of Ottawa              | Ottawa, ON, Canada                       | Collaborator                                            |                                                                                            |
| Michel                            | Shamy      |                       | MD               | Ottawa Hospital, University of Ottawa              | Ottawa, ON, Canada                       | Collaborator                                            |                                                                                            |

## Supplemental Online Content: Nonauthor Collaborators

\*Indicates required information. Only first name, last name, and suffix will appear in PubMed.

| *First Name and Middle Initial(s) | *Last Name | *Suffix (eg, Jr, III) | Academic Degrees | Institution                                      | Location (city, state/province, country) | Role or Contribution, eg, chair, principal investigator | Group (if more than 1 Group listed in the byline and/or Subgroup (eg, Steering Committee)) |
|-----------------------------------|------------|-----------------------|------------------|--------------------------------------------------|------------------------------------------|---------------------------------------------------------|--------------------------------------------------------------------------------------------|
| Grant                             | Stotts     |                       | MD               | Ottawa Hospital, University of Ottawa            | Ottawa, ON, Canada                       | Collaborator                                            |                                                                                            |
| Dylan                             | Blacquiere |                       | MD               | Ottawa Hospital, University of Ottawa            | Ottawa, ON, Canada                       | Collaborator                                            |                                                                                            |
| Howard                            | Lesiuk     |                       | MD               | Ottawa Hospital, University of Ottawa            | Ottawa, ON, Canada                       | Collaborator                                            |                                                                                            |
| Aiman                             | Quateen    |                       | MD               | Ottawa Hospital, University of Ottawa            | Ottawa, ON, Canada                       | Collaborator                                            |                                                                                            |
| Brian                             | Drake      |                       | MB               | Ottawa Hospital, University of Ottawa            | Ottawa, ON, Canada                       | Collaborator                                            |                                                                                            |
| Brian                             | Dewar      |                       | MLIS             | Ottawa Hospital, University of Ottawa            | Ottawa, ON, Canada                       | Collaborator                                            |                                                                                            |
| Zeinab                            | Daham      |                       |                  | Ottawa Hospital, University of Ottawa            | Ottawa, ON, Canada                       | Collaborator                                            |                                                                                            |
|                                   |            |                       |                  |                                                  |                                          |                                                         |                                                                                            |
| Michael E.                        | Kelly      |                       | MD, PhD          | Royal University Hospital, University of Saskatc | Saskatoon, SK, Canada                    | Site PI                                                 |                                                                                            |
| Gary                              | Hunter     |                       | MD, FRCPC        | Royal University Hospital, University of Saskatc | Saskatoon, SK, Canada                    | Collaborator                                            |                                                                                            |
| Lissa M.                          | Peeling    |                       | MD, FRCSC        | Royal University Hospital, University of Saskatc | Saskatoon, SK, Canada                    | Collaborator                                            |                                                                                            |
| Brett R.                          | Graham     |                       | MD, FRCPC        | Royal University Hospital, University of Saskatc | Saskatoon, SK, Canada                    | Collaborator                                            |                                                                                            |
| Ruth                              | Whelan     |                       | BSN, MSN         | Royal University Hospital, University of Saskatc | Saskatoon, SK, Canada                    | Collaborator                                            |                                                                                            |
| Aaron J.                          | Garner     |                       | BSN              | Royal University Hospital, University of Saskatc | Saskatoon, SK, Canada                    | Collaborator                                            |                                                                                            |
| Lilian                            | Urroz      |                       | MD               | Royal University Hospital, University of Saskatc | Saskatoon, SK, Canada                    | Collaborator                                            |                                                                                            |
| Sharleen                          | Maley      |                       | BA               | Royal University Hospital, University of Saskatc | Saskatoon, SK, Canada                    | Collaborator                                            |                                                                                            |
|                                   |            |                       |                  |                                                  |                                          |                                                         |                                                                                            |
| Frank L.                          | Silver     |                       | MD               | University Health Network, University of Toron   | Toronto ON, Canada                       | Site PI                                                 |                                                                                            |
| Leanne                            | Casaubon   |                       | MD               | University Health Network, University of Toron   | Toronto ON, Canada                       | Collaborator                                            |                                                                                            |
| Aleksanda                         | Pikula     |                       | MD               | University Health Network, University of Toron   | Toronto ON, Canada                       | Collaborator                                            |                                                                                            |
| Martin del                        | Campo      |                       | MD               | University Health Network, University of Toron   | Toronto ON, Canada                       | Collaborator                                            |                                                                                            |
| Joanna                            | Schaafsma  |                       | MD               | University Health Network, University of Toron   | Toronto ON, Canada                       | Collaborator                                            |                                                                                            |
| Cheryl                            | Jaigobin   |                       | MD               | University Health Network, University of Toron   | Toronto ON, Canada                       | Collaborator                                            |                                                                                            |
| Timo                              | Krings     |                       | MD               | University Health Network, University of Toron   | Toronto ON, Canada                       | Collaborator                                            |                                                                                            |
| Vitor                             | Pereira    |                       | MD               | University Health Network, University of Toron   | Toronto ON, Canada                       | Collaborator                                            |                                                                                            |
| Ronit                             | Agid       |                       | MD               | University Health Network, University of Toron   | Toronto ON, Canada                       | Collaborator                                            |                                                                                            |
| Richard                           | Farb       |                       | MD               | University Health Network, University of Toron   | Toronto ON, Canada                       | Collaborator                                            |                                                                                            |
| Libby                             | Kalman     |                       | RN               | University Health Network, University of Toron   | Toronto ON, Canada                       | Collaborator                                            |                                                                                            |
| Anne                              | Cayley     |                       | RN               | University Health Network, University of Toron   | Toronto ON, Canada                       | Collaborator                                            |                                                                                            |
| Janice                            | Williams   |                       |                  | University Health Network, University of Toron   | Toronto ON, Canada                       | Collaborator                                            |                                                                                            |
| Tim                               | Stewart    |                       |                  | University Health Network, University of Toron   | Toronto ON, Canada                       | Collaborator                                            |                                                                                            |
| Karen                             | Misquitta  |                       | RN               | University Health Network, University of Toron   | Toronto ON, Canada                       | Collaborator                                            |                                                                                            |
|                                   |            |                       |                  |                                                  |                                          |                                                         |                                                                                            |
| Aditya                            | Bharatha   |                       | MD               | St. Michael's Hospital, University of Toronto    | Toronto, ON, Canada                      | Site PI                                                 |                                                                                            |
| Daniel H.                         | Selchen    |                       | MD, FRCPC        | St. Michael's Hospital, University of Toronto    | Toronto, ON, Canada                      | Collaborator                                            |                                                                                            |
| Thomas R.                         | Marotta    |                       | MD, FRCPC        | St. Michael's Hospital, University of Toronto    | Toronto, ON, Canada                      | Collaborator                                            |                                                                                            |

## Supplemental Online Content: Nonauthor Collaborators

\*Indicates required information. Only first name, last name, and suffix will appear in PubMed.

| *First Name and Middle Initial(s) | *Last Name       | *Suffix (eg, Jr, III) | Academic Degrees    | Institution                                    | Location (city, state/province, country) | Role or Contribution, eg, chair, principal investigator | Group (if more than 1 Group listed in the byline and/or Subgroup (eg, Steering Committee)) |
|-----------------------------------|------------------|-----------------------|---------------------|------------------------------------------------|------------------------------------------|---------------------------------------------------------|--------------------------------------------------------------------------------------------|
| Dipanka                           | Sarma            |                       | MBBS                | St. Michael's Hospital, University of Toronto  | Toronto, ON, Canada                      | Collaborator                                            |                                                                                            |
| Walter J.                         | Montanera        |                       | MD, FRCPC           | St. Michael's Hospital, University of Toronto  | Toronto, ON, Canada                      | Collaborator                                            |                                                                                            |
| Julian                            | Spears           |                       | MD, SM, FRCSC, FACS | St. Michael's Hospital, University of Toronto  | Toronto, ON, Canada                      | Collaborator                                            |                                                                                            |
| Gustavo                           | Saposnik         |                       | MD, MSc, FRCPC      | St. Michael's Hospital, University of Toronto  | Toronto, ON, Canada                      | Collaborator                                            |                                                                                            |
| Pawel                             | Kostyrko         |                       | MD, MSc             | St. Michael's Hospital, University of Toronto  | Toronto, ON, Canada                      | Collaborator                                            |                                                                                            |
| Yangmei                           | Li               |                       | PhD, CCRC, CCRP     | St. Michael's Hospital, University of Toronto  | Toronto, ON, Canada                      | Collaborator                                            |                                                                                            |
| Carmen                            | Parra-Farinas    |                       | MD                  | St. Michael's Hospital, University of Toronto  | Toronto, ON, Canada                      | Collaborator                                            |                                                                                            |
| Jose Danilo Bengzon               | Diestro          |                       | MD                  | St. Michael's Hospital, University of Toronto  | Toronto, ON, Canada                      | Collaborator                                            |                                                                                            |
| Marie-Christine                   | Camden           |                       | MD                  | CHU de Québec - Enfant-Jésus Hospital, Laval U | Québec City, QC, Canada                  | Site PI                                                 |                                                                                            |
| Steve                             | Verreault        |                       | MD, FRCPC           | CHU de Québec - Enfant-Jésus Hospital, Laval U | Québec City, QC, Canada                  | Collaborator                                            |                                                                                            |
| Ariane                            | Mackey           |                       | MD, FRCPC           | CHU de Québec - Enfant-Jésus Hospital, Laval U | Québec City, QC, Canada                  | Collaborator                                            |                                                                                            |
| Marie-Eve                         | Audet            |                       | MD, FRCPC           | CHU de Québec - Enfant-Jésus Hospital, Laval U | Québec City, QC, Canada                  | Collaborator                                            |                                                                                            |
| Geneviève                         | Milot            |                       | MD, FRCPC           | CHU de Québec - Enfant-Jésus Hospital, Laval U | Québec City, QC, Canada                  | Collaborator                                            |                                                                                            |
| Pascale                           | Lavoie           |                       | MD, FRCPC           | CHU de Québec - Enfant-Jésus Hospital, Laval U | Québec City, QC, Canada                  | Collaborator                                            |                                                                                            |
| Jean-Luc                          | Gariépy          |                       | MD, FRCPC           | CHU de Québec - Enfant-Jésus Hospital, Laval U | Québec City, QC, Canada                  | Collaborator                                            |                                                                                            |
| Karine                            | Collard          |                       |                     | CHU de Québec - Enfant-Jésus Hospital, Laval U | Québec City, QC, Canada                  | Collaborator                                            |                                                                                            |
| Annette                           | Haché            |                       |                     | CHU de Québec - Enfant-Jésus Hospital, Laval U | Québec City, QC, Canada                  | Collaborator                                            |                                                                                            |
| Demetrios J.                      | Sahlas           |                       | MD                  | McMaster University                            | Hamilton, ON, Canada                     | Site PI                                                 |                                                                                            |
| Ahmed M.                          | Alshanbari       |                       | MBBS                | McMaster University                            | Hamilton, ON, Canada                     | Collaborator                                            |                                                                                            |
| Josephine                         | Baldwin          |                       |                     | McMaster University                            | Hamilton, ON, Canada                     | Collaborator                                            |                                                                                            |
| Luciana                           | Catanese         |                       | MD                  | McMaster University                            | Hamilton, ON, Canada                     | Collaborator                                            |                                                                                            |
| Bing Y.                           | Chen             |                       | MD                  | McMaster University                            | Hamilton, ON, Canada                     | Collaborator                                            |                                                                                            |
| Danielle de                       | Sa Boasquevisque |                       | MD                  | McMaster University                            | Hamilton, ON, Canada                     | Collaborator                                            |                                                                                            |
| Aviraj S.                         | Deshmukh         |                       | MBBS                | McMaster University                            | Hamilton, ON, Canada                     | Collaborator                                            |                                                                                            |
| Josrdan M.                        | Knapman          |                       | MSc                 | McMaster University                            | Hamilton, ON, Canada                     | Collaborator                                            |                                                                                            |
| Shana                             | Lamers           |                       | MSc                 | McMaster University                            | Hamilton, ON, Canada                     | Collaborator                                            |                                                                                            |
| Ramiro A.                         | Larrazabal       |                       | MD                  | McMaster University                            | Hamilton, ON, Canada                     | Collaborator                                            |                                                                                            |
| Susan V.                          | MacMillan        |                       | MSc                 | McMaster University                            | Hamilton, ON, Canada                     | Collaborator                                            |                                                                                            |
| Lauren M.                         | Mai              |                       | MD                  | McMaster University                            | Hamilton, ON, Canada                     | Collaborator                                            |                                                                                            |
| Alicia M.                         | Mattai           |                       | MD                  | McMaster University                            | Hamilton, ON, Canada                     | Collaborator                                            |                                                                                            |



## Supplemental Online Content: Nonauthor Collaborators

\*Indicates required information. Only first name, last name, and suffix will appear in PubMed.

| *First Name and Middle Initial(s) | *Last Name  | *Suffix (eg, Jr, III) | Academic Degrees | Institution                    | Location (city, state/province, country) | Role or Contribution, eg, chair, principal investigator | Group (if more than 1 Group listed in the byline and/or Subgroup (eg, Steering Committee)) |
|-----------------------------------|-------------|-----------------------|------------------|--------------------------------|------------------------------------------|---------------------------------------------------------|--------------------------------------------------------------------------------------------|
| Sumiti                            | Nayar       |                       | MD               | McMaster University            | Hamilton, ON, Canada                     | Collaborator                                            |                                                                                            |
| Kuan H.                           | Ng          |                       | MBBS             | McMaster University            | Hamilton, ON, Canada                     | Collaborator                                            |                                                                                            |
| Wieslaw J.                        | Oczkowski   |                       | MD               | McMaster University            | Hamilton, ON, Canada                     | Collaborator                                            |                                                                                            |
| Kanjana S.                        | Perera      |                       | MBBS             | McMaster University            | Hamilton, ON, Canada                     | Collaborator                                            |                                                                                            |
| Mays A. K.                        | Shawawrah   |                       | MBBS             | McMaster University            | Hamilton, ON, Canada                     | Collaborator                                            |                                                                                            |
| Ashkan                            | Shoamanesh  |                       | MD               | McMaster University            | Hamilton, ON, Canada                     | Collaborator                                            |                                                                                            |
| Gita                              | Sobhi       |                       | BSc              | McMaster University            | Hamilton, ON, Canada                     | Collaborator                                            |                                                                                            |
| Nabeel M.                         | Syed        |                       | MD               | McMaster University            | Hamilton, ON, Canada                     | Collaborator                                            |                                                                                            |
| Noran Y.                          | Yaher       |                       | MBBS             | McMaster University            | Hamilton, ON, Canada                     | Collaborator                                            |                                                                                            |
| Cheyanne                          | Vandervelde |                       | BSc              | McMaster University            | Hamilton, ON, Canada                     | Collaborator                                            |                                                                                            |
| Di                                | Wang        |                       | Pharm D          | McMaster University            | Hamilton, ON, Canada                     | Collaborator                                            |                                                                                            |
| Thalia S.                         | Field       |                       | MD, FRCPC, MHSc  | University of British Columbia | Vancouver, BC, Canada                    | Site PI                                                 |                                                                                            |
| Stephen C.                        | Van Gaal    |                       | MD, FRCPC        | University of British Columbia | Vancouver, BC, Canada                    | Collaborator                                            |                                                                                            |
| Philip A.                         | Teal        |                       | MD, FRCPC        | University of British Columbia | Vancouver, BC, Canada                    | Collaborator                                            |                                                                                            |
| Oscar R.                          | Benavente   |                       | MD, FRCPC        | University of British Columbia | Vancouver, BC, Canada                    | Collaborator                                            |                                                                                            |
| Laura K.                          | Wilson      |                       | MD, FRCPC        | University of British Columbia | Vancouver, BC, Canada                    | Collaborator                                            |                                                                                            |
| Sharanpal K.                      | Mann        |                       | MD, FRCPC        | University of British Columbia | Vancouver, BC, Canada                    | Collaborator                                            |                                                                                            |
| Samuel                            | Yip         |                       | PhD, MD, FRCPC   | University of British Columbia | Vancouver, BC, Canada                    | Collaborator                                            |                                                                                            |
| Colleen B.                        | Murphy      |                       | MD, FRCPC        | University of British Columbia | Vancouver, BC, Canada                    | Collaborator                                            |                                                                                            |
| Manraj K.S.                       | Heran       |                       | MD, FRCPC        | University of British Columbia | Vancouver, BC, Canada                    | Collaborator                                            |                                                                                            |
| Axel                              | Rohr        |                       | MD, PhD          | University of British Columbia | Vancouver, BC, Canada                    | Collaborator                                            |                                                                                            |
| Fabio                             | Settecase   |                       | MD, MSc, FRCPC   | University of British Columbia | Vancouver, BC, Canada                    | Collaborator                                            |                                                                                            |
| Gary J.                           | Redekop     |                       | MD, MSc, FRCSC   | University of British Columbia | Vancouver, BC, Canada                    | Collaborator                                            |                                                                                            |
| Charles S.                        | Haw         |                       | MD, MSc, FRCSC   | University of British Columbia | Vancouver, BC, Canada                    | Collaborator                                            |                                                                                            |
| Genoveva                          | Maclean     |                       | RN               | University of British Columbia | Vancouver, BC, Canada                    | Collaborator                                            |                                                                                            |
| Karina                            | Murray      |                       | RN               | University of British Columbia | Vancouver, BC, Canada                    | Collaborator                                            |                                                                                            |
| Rosalin                           | Chiu        |                       | RN               | University of British Columbia | Vancouver, BC, Canada                    | Collaborator                                            |                                                                                            |
| Alana M.                          | Flexman     |                       | MD, FRCPC        | University of British Columbia | Vancouver, BC, Canada                    | Collaborator                                            |                                                                                            |
| Eilidh                            | Strecha     |                       | RN               | University of British Columbia | Vancouver, BC, Canada                    | Collaborator                                            |                                                                                            |
| Yolanda                           | Gayton      |                       | RN               | University of British Columbia | Vancouver, BC, Canada                    | Collaborator                                            |                                                                                            |

## Supplemental Online Content: Nonauthor Collaborators

\*Indicates required information. Only first name, last name, and suffix will appear in PubMed.

| *First Name and Middle Initial(s) | *Last Name       | *Suffix (eg, Jr, III) | Academic Degrees                  | Institution                                   | Location (city, state/province, country) | Role or Contribution, eg, chair, principal investigator | Group (if more than 1 Group listed in the byline and/or Subgroup (eg, Steering Committee)) |
|-----------------------------------|------------------|-----------------------|-----------------------------------|-----------------------------------------------|------------------------------------------|---------------------------------------------------------|--------------------------------------------------------------------------------------------|
| Judy                              | Yip              |                       | BSc (Pharm),<br>ACPR              | University of British Columbia                | Vancouver, BC, Canada                    | Collaborator                                            |                                                                                            |
| Richard H.                        | Swartz           |                       | MD, PhD                           | Sunnybrook Health Sciences Centre, University | Toronto ON, Canada                       | Site PI                                                 |                                                                                            |
| Mark I.                           | Boulos           |                       | MD                                | Sunnybrook Health Sciences Centre, University | Toronto ON, Canada                       | Collaborator                                            |                                                                                            |
| David J.                          | Gladstone        |                       | MD, PhD                           | Sunnybrook Health Sciences Centre, University | Toronto ON, Canada                       | Collaborator                                            |                                                                                            |
| Amy Y.                            | Yu               |                       | MD                                | Sunnybrook Health Sciences Centre, University | Toronto ON, Canada                       | Collaborator                                            |                                                                                            |
| Julia J.                          | Hopyan           |                       | MBBS                              | Sunnybrook Health Sciences Centre, University | Toronto ON, Canada                       | Collaborator                                            |                                                                                            |
| Houman                            | Khosravani       |                       | MD, PhD                           | Sunnybrook Health Sciences Centre, University | Toronto ON, Canada                       | Collaborator                                            |                                                                                            |
| Herbert A.                        | Manosalva Alzate |                       | MD                                | Sunnybrook Health Sciences Centre, University | Toronto ON, Canada                       | Collaborator                                            |                                                                                            |
| Alisia                            | Southwell        |                       | HBSc                              | Sunnybrook Health Sciences Centre, University | Toronto ON, Canada                       | Collaborator                                            |                                                                                            |
| Maneesha                          | Kamra            |                       | MD                                | Sunnybrook Health Sciences Centre, University | Toronto ON, Canada                       | Collaborator                                            |                                                                                            |
| Kaitlyn N.                        | Lopes            |                       | BMSc                              | Sunnybrook Health Sciences Centre, University | Toronto ON, Canada                       | Collaborator                                            |                                                                                            |
| Arunima                           | Kapoor           |                       | MSc                               | Sunnybrook Health Sciences Centre, University | Toronto ON, Canada                       | Collaborator                                            |                                                                                            |
| Leodante                          | da Costa         |                       | MD                                | Sunnybrook Health Sciences Centre, University | Toronto ON, Canada                       | Collaborator                                            |                                                                                            |
| Victor X. D.                      | Yang             |                       | MD, PhD                           | Sunnybrook Health Sciences Centre, University | Toronto ON, Canada                       | Collaborator                                            |                                                                                            |
| Erin E.                           | Dyer             |                       | MD                                | Sunnybrook Health Sciences Centre, University | Toronto ON, Canada                       | Collaborator                                            |                                                                                            |
| Ruchir A.                         | Shah             |                       | MD                                | Erlanger Hospital                             | Chattanooga, TN, US                      | Site PI                                                 |                                                                                            |
| Brenda M.                         | Knowles          |                       | MSN, RN                           | Erlanger Hospital                             | Chattanooga, TN, US                      | Collaborator                                            |                                                                                            |
| Jennifer                          | Nichols          |                       | MSN,<br>AGACNP-BC                 | Erlanger Hospital                             | Chattanooga, TN, US                      | Collaborator                                            |                                                                                            |
| Jennifer L.                       | Patterson        |                       | RN, MSN,<br>ACNP-BC,<br>CCRN, FHM | Erlanger Hospital                             | Chattanooga, TN, US                      | Collaborator                                            |                                                                                            |
| Krista A.                         | Cope             |                       | Pharm D, RD,<br>LDN               | Erlanger Hospital                             | Chattanooga, TN, US                      | Collaborator                                            |                                                                                            |
| Lee                               | Dickerson        |                       | aPT                               | Erlanger Hospital                             | Chattanooga, TN, US                      | Collaborator                                            |                                                                                            |
| Katrina K.                        | Barton           |                       | CCRC                              | Erlanger Hospital                             | Chattanooga, TN, US                      | Collaborator                                            |                                                                                            |
| Kimberly D.                       | Gray             |                       | CRC                               | Erlanger Hospital                             | Chattanooga, TN, US                      | Collaborator                                            |                                                                                            |
| Tacey N.                          | Massengale       |                       | CRC                               | Erlanger Hospital                             | Chattanooga, TN, US                      | Collaborator                                            |                                                                                            |
| Melanie G.                        | Miller           |                       | RN, CRNI                          | Erlanger Hospital                             | Chattanooga, TN, US                      | Collaborator                                            |                                                                                            |
| Cindy                             | Simpson          |                       | BSN, RN                           | Erlanger Hospital                             | Chattanooga, TN, US                      | Collaborator                                            |                                                                                            |
| Sabrina                           | Walker           |                       | MSN, RN-BC                        | Erlanger Hospital                             | Chattanooga, TN, US                      | Collaborator                                            |                                                                                            |
| Chlin R.                          | Tennyson-Yemm    |                       | BSN RN                            | Erlanger Hospital                             | Chattanooga, TN, US                      | Collaborator                                            |                                                                                            |

## Supplemental Online Content: Nonauthor Collaborators

\*Indicates required information. Only first name, last name, and suffix will appear in PubMed.

| *First Name and Middle Initial(s) | *Last Name  | *Suffix (eg, Jr, III) | Academic Degrees           | Institution                                    | Location (city, state/province, country) | Role or Contribution, eg, chair, principal investigator | Group (if more than 1 Group listed in the byline and/or Subgroup (eg, Steering Committee)) |
|-----------------------------------|-------------|-----------------------|----------------------------|------------------------------------------------|------------------------------------------|---------------------------------------------------------|--------------------------------------------------------------------------------------------|
| Donald F.                         | Frei        |                       | MD                         | Swedish Medical Center- Colorado Neurological  | Denver, CO, US                           | Site PI                                                 |                                                                                            |
| Richard J.                        | Bellon      |                       | MD                         | Swedish Medical Center- Colorado Neurological  | Denver, CO, US                           | Collaborator                                            |                                                                                            |
| Benjamin N.                       | Atchie      |                       | DO                         | Swedish Medical Center- Colorado Neurological  | Denver, CO, US                           | Collaborator                                            |                                                                                            |
| Ian A.                            | Kaminsky    |                       | MD                         | Swedish Medical Center- Colorado Neurological  | Denver, CO, US                           | Collaborator                                            |                                                                                            |
| Duandelyn C.                      | Wilson      |                       | NP                         | Swedish Medical Center- Colorado Neurological  | Denver, CO, US                           | Collaborator                                            |                                                                                            |
| Nicolle L.                        | Schraeder   |                       | NP                         | Swedish Medical Center- Colorado Neurological  | Denver, CO, US                           | Collaborator                                            |                                                                                            |
| Eric J.                           | Arias       |                       | MD                         | Swedish Medical Center- Colorado Neurological  | Denver, CO, US                           | Collaborator                                            |                                                                                            |
| Lisa M.                           | Kodis       |                       | MSN, RN                    | Swedish Medical Center- Colorado Neurological  | Denver, CO, US                           | Collaborator                                            |                                                                                            |
| Mark E.                           | Talley      |                       | MS                         | Swedish Medical Center- Colorado Neurological  | Denver, CO, US                           | Collaborator                                            |                                                                                            |
| Alex A.                           | Edinger     |                       | BS                         | Swedish Medical Center- Colorado Neurological  | Denver, CO, US                           | Collaborator                                            |                                                                                            |
| Tiffany C.                        | Talley      |                       | MS                         | Swedish Medical Center- Colorado Neurological  | Denver, CO, US                           | Collaborator                                            |                                                                                            |
| Ita P.                            | Dempsey     |                       | RN                         | Swedish Medical Center- Colorado Neurological  | Denver, CO, US                           | Collaborator                                            |                                                                                            |
| Laurie A.                         | Williams    |                       | RN                         | Swedish Medical Center- Colorado Neurological  | Denver, CO, US                           | Collaborator                                            |                                                                                            |
| Scott A.                          | Williams    |                       | Pharm D, BCOP              | Swedish Medical Center- Colorado Neurological  | Denver, CO, US                           | Collaborator                                            |                                                                                            |
| Sonny                             | Kupniewski  |                       | Pharm D, BCPS              | Swedish Medical Center- Colorado Neurological  | Denver, CO, US                           | Collaborator                                            |                                                                                            |
| Brad K.                           | Fasbinder   |                       | BS                         | Swedish Medical Center- Colorado Neurological  | Denver, CO, US                           | Collaborator                                            |                                                                                            |
| Joanna M.                         | Snead       |                       | MS, CCRP                   | Swedish Medical Center- Colorado Neurological  | Denver, CO, US                           | Collaborator                                            |                                                                                            |
|                                   |             |                       |                            |                                                |                                          |                                                         |                                                                                            |
| Hana                              | Choe        |                       | MD                         | Neurosciences Institute, Abington Jefferson Hc | Philadelphia, PA, US                     | Site PI                                                 |                                                                                            |
| Larami                            | Mackenzie   |                       | MD                         | Neurosciences Institute, Abington Jefferson Hc | Philadelphia, PA, US                     | Collaborator                                            |                                                                                            |
| David C.                          | Weisman     |                       | MD                         | Neurosciences Institute, Abington Jefferson Hc | Philadelphia, PA, US                     | Collaborator                                            |                                                                                            |
| Osman S.                          | Kozak       |                       | MD                         | Neurosciences Institute, Abington Jefferson Hc | Philadelphia, PA, US                     | Collaborator                                            |                                                                                            |
| Qaisar A.                         | Shah        |                       | MD                         | Neurosciences Institute, Abington Jefferson Hc | Philadelphia, PA, US                     | Collaborator                                            |                                                                                            |
| Dan                               | Gzesh       |                       | MD                         | Neurosciences Institute, Abington Jefferson Hc | Philadelphia, PA, US                     | Collaborator                                            |                                                                                            |
| Kandan                            | Kulandaivel |                       | MD                         | Neurosciences Institute, Abington Jefferson Hc | Philadelphia, PA, US                     | Collaborator                                            |                                                                                            |
| John S.                           | Khoury      |                       | MD                         | Neurosciences Institute, Abington Jefferson Hc | Philadelphia, PA, US                     | Collaborator                                            |                                                                                            |
| Brad                              | Klein       |                       | MD, MBA                    | Neurosciences Institute, Abington Jefferson Hc | Philadelphia, PA, US                     | Collaborator                                            |                                                                                            |
| Patricia A.                       | Bussinger   |                       | MBA, MSN, AGACN P-BC, CRNP | Neurosciences Institute, Abington Jefferson Hc | Philadelphia, PA, US                     | Collaborator                                            |                                                                                            |
| Lisa R.                           | Griffin     |                       | AGACNP-BC, CRNP            | Neurosciences Institute, Abington Jefferson Hc | Philadelphia, PA, US                     | Collaborator                                            |                                                                                            |
| Ashley L.                         | DePalmo     |                       | BA, CRC                    | Neurosciences Institute, Abington Jefferson Hc | Philadelphia, PA, US                     | Collaborator                                            |                                                                                            |
| Cynthia                           | Oliva       |                       | PharmD                     | Neurosciences Institute, Abington Jefferson Hc | Philadelphia, PA, US                     | Collaborator                                            |                                                                                            |

## Supplemental Online Content: Nonauthor Collaborators

\*Indicates required information. Only first name, last name, and suffix will appear in PubMed.

| *First Name and Middle Initial(s) | *Last Name      | *Suffix (eg, Jr, III) | Academic Degrees | Institution            | Location (city, state/province, country) | Role or Contribution, eg, chair, principal investigator | Group (if more than 1 Group listed in the byline and/or Subgroup (eg, Steering Committee)) |
|-----------------------------------|-----------------|-----------------------|------------------|------------------------|------------------------------------------|---------------------------------------------------------|--------------------------------------------------------------------------------------------|
| Ashutosh                          | Jadhav          |                       | MD               | UPMC Medical Centre    | Pittsburgh, PA, US                       | Site PI                                                 |                                                                                            |
| Tudor                             | Jovin           |                       | MD               | UPMC Medical Centre    | Pittsburgh, PA, US                       | Collaborator                                            |                                                                                            |
| Cynthia                           | Kenmuir         |                       | MD               | UPMC Medical Centre    | Pittsburgh, PA, US                       | Collaborator                                            |                                                                                            |
| Brian                             | Jankowitz       |                       | MD               | UPMC Medical Centre    | Pittsburgh, PA, US                       | Collaborator                                            |                                                                                            |
| Bradley                           | Gross           |                       | MD               | UPMC Medical Centre    | Pittsburgh, PA, US                       | Collaborator                                            |                                                                                            |
| Marcelo                           | Rocha           |                       | MD               | UPMC Medical Centre    | Pittsburgh, PA, US                       | Collaborator                                            |                                                                                            |
| Matthew                           | Starr           |                       | MD               | UPMC Medical Centre    | Pittsburgh, PA, US                       | Collaborator                                            |                                                                                            |
| Merritt                           | Brown           |                       | MD               | UPMC Medical Centre    | Pittsburgh, PA, US                       | Collaborator                                            |                                                                                            |
| Chrstine                          | Hawkes          |                       | MD               | UPMC Medical Centre    | Pittsburgh, PA, US                       | Collaborator                                            |                                                                                            |
| Kavit                             | Shah            |                       | MD               | UPMC Medical Centre    | Pittsburgh, PA, US                       | Collaborator                                            |                                                                                            |
| Danoushka                         | Tememe          |                       | MD               | UPMC Medical Centre    | Pittsburgh, PA, US                       | Collaborator                                            |                                                                                            |
| Gregory                           | Walker          |                       | MD               | UPMC Medical Centre    | Pittsburgh, PA, US                       | Collaborator                                            |                                                                                            |
| Pratit                            | Patel           |                       | MD               | UPMC Medical Centre    | Pittsburgh, PA, US                       | Collaborator                                            |                                                                                            |
| Bradley                           | Klein           |                       | MD               | UPMC Medical Centre    | Pittsburgh, PA, US                       | Collaborator                                            |                                                                                            |
| Habibullah                        | Ziayee          |                       | MD               | UPMC Medical Centre    | Pittsburgh, PA, US                       | Collaborator                                            |                                                                                            |
| Kaustubh                          | Limaye          |                       | MD               | UPMC Medical Centre    | Pittsburgh, PA, US                       | Collaborator                                            |                                                                                            |
| Lisa                              | Baxendell       |                       | BSN              | UPMC Medical Centre    | Pittsburgh, PA, US                       | Collaborator                                            |                                                                                            |
| Vicki                             | Glichrist       |                       | BSN              | UPMC Medical Centre    | Pittsburgh, PA, US                       | Collaborator                                            |                                                                                            |
| Patricia                          | Feineigle       |                       | BSN,PhD          | UPMC Medical Centre    | Pittsburgh, PA, US                       | Collaborator                                            |                                                                                            |
| Kelsea                            | Toseki Haibach  |                       | BSN              | UPMC Medical Centre    | Pittsburgh, PA, US                       | Collaborator                                            |                                                                                            |
| Cathy                             | Van Every       |                       | BSN              | UPMC Medical Centre    | Pittsburgh, PA, US                       | Collaborator                                            |                                                                                            |
| Shasvat                           | Desai           |                       |                  | UPMC Medical Centre    | Pittsburgh, PA, US                       | Collaborator                                            |                                                                                            |
| Maryam                            | Zulfiqar        |                       |                  | UPMC Medical Centre    | Pittsburgh, PA, US                       | Collaborator                                            |                                                                                            |
| Linda                             | Gibson          |                       |                  | UPMC Medical Centre    | Pittsburgh, PA, US                       | Collaborator                                            |                                                                                            |
| Sean                              | Barrett         |                       |                  | UPMC Medical Centre    | Pittsburgh, PA, US                       | Collaborator                                            |                                                                                            |
| David                             | Turkel-Parrella |                       | MD               | NYU School of Medicine | Brooklyn, NY, US                         | Site PI                                                 |                                                                                            |
| Karthikeyan                       | Arcot           |                       | MD               | NYU School of Medicine | Brooklyn, NY, US                         | Collaborator                                            |                                                                                            |
| Steven                            | DiCrescento     |                       | RPh              | NYU School of Medicine | Brooklyn, NY, US                         | Collaborator                                            |                                                                                            |
| Jeffrey                           | Farkas          |                       | MD               | NYU School of Medicine | Brooklyn, NY, US                         | Collaborator                                            |                                                                                            |
| Gregory                           | Filipowski      |                       | RPh              | NYU School of Medicine | Brooklyn, NY, US                         | Collaborator                                            |                                                                                            |
| Jennifer                          | Frontera        |                       | MD               | NYU School of Medicine | Brooklyn, NY, US                         | Collaborator                                            |                                                                                            |
| Danielle                          | Joset           |                       | PharmD           | NYU School of Medicine | Brooklyn, NY, US                         | Collaborator                                            |                                                                                            |
| Jeremy                            | Liff            |                       | MD               | NYU School of Medicine | Brooklyn, NY, US                         | Collaborator                                            |                                                                                            |
| Erica                             | Scher           |                       | RN, MPH          | NYU School of Medicine | Brooklyn, NY, US                         | Collaborator                                            |                                                                                            |

Supplemental Online Content: Nonauthor Collaborators

\*Indicates required information. Only first name, last name, and suffix will appear in PubMed.

| *First Name and Middle Initial(s) | *Last Name      | *Suffix (eg, Jr, III) | Academic Degrees | Institution                                  | Location (city, state/province, country) | Role or Contribution, eg, chair, principal investigator | Group (if more than 1 Group listed in the byline and/or Subgroup (eg, Steering Committee)) |
|-----------------------------------|-----------------|-----------------------|------------------|----------------------------------------------|------------------------------------------|---------------------------------------------------------|--------------------------------------------------------------------------------------------|
| Cameron G.                        | McDougall       |                       | MD               | Swedish Neurological Institute               | Seattle, WA, US                          | Site PI                                                 |                                                                                            |
| Cheryl E.                         | Kelly           |                       | BSN, CNRN        | Swedish Neurological Institute               | Seattle, WA, US                          | Collaborator                                            |                                                                                            |
| Akshal S.                         | Patel           |                       | MD               | Swedish Neurological Institute               | Seattle, WA, US                          | Collaborator                                            |                                                                                            |
| Stephen J.                        | Monteith        |                       | MD               | Swedish Neurological Institute               | Seattle, WA, US                          | Collaborator                                            |                                                                                            |
| Sidney                            | Starkman        |                       | MD               | UCLA Comprehensive Stroke Center, University | Los Angeles, Los Angeles,                | Site PI                                                 |                                                                                            |
| Kunakorn C.                       | Atchaneeyasakul |                       | MD               | UCLA Comprehensive Stroke Center, University | Los Angeles, Los Angeles,                | Collaborator                                            |                                                                                            |
| Adrian M.                         | Burgos          |                       | MD               | UCLA Comprehensive Stroke Center, University | Los Angeles, Los Angeles,                | Collaborator                                            |                                                                                            |
| Janice                            | Anne Y. Chua    |                       | BSN, CNRN        | UCLA Comprehensive Stroke Center, University | Los Angeles, Los Angeles,                | Collaborator                                            |                                                                                            |
| Nathan D.                         | Gaines          |                       | MD               | UCLA Comprehensive Stroke Center, University | Los Angeles, Los Angeles,                | Collaborator                                            |                                                                                            |
| Ileana D.                         | Grunberg        |                       | RN               | UCLA Comprehensive Stroke Center, University | Los Angeles, Los Angeles,                | Collaborator                                            |                                                                                            |
| Judy                              | Guzy            |                       | RN               | UCLA Comprehensive Stroke Center, University | Los Angeles, Los Angeles,                | Collaborator                                            |                                                                                            |
| Zuolu                             | Liu             |                       | MD               | UCLA Comprehensive Stroke Center, University | Los Angeles, Los Angeles,                | Collaborator                                            |                                                                                            |
| Neil D.                           | Maluste         |                       | MD               | UCLA Comprehensive Stroke Center, University | Los Angeles, Los Angeles,                | Collaborator                                            |                                                                                            |
| Lucas                             | Ramirez         |                       | MD               | UCLA Comprehensive Stroke Center, University | Los Angeles, Los Angeles,                | Collaborator                                            |                                                                                            |
| Latisha K.                        | Sharma          |                       | MD               | UCLA Comprehensive Stroke Center, University | Los Angeles, Los Angeles,                | Collaborator                                            |                                                                                            |
| Donald                            | Heck            |                       | MD               | Forsyth Medical Center                       | Winston-Salem, NC, US                    | Site PI                                                 |                                                                                            |
| Morry                             | Brown           |                       | MD, PhD          | Forsyth Medical Center                       | Winston-Salem, NC, US                    | Collaborator                                            |                                                                                            |
| Colin                             | McDonald        |                       | MD               | Forsyth Medical Center                       | Winston-Salem, NC, US                    | Collaborator                                            |                                                                                            |
| Mateo                             | Calderon        |                       | MD               | Forsyth Medical Center                       | Winston-Salem, NC, US                    | Collaborator                                            |                                                                                            |
| Mitch                             | Hargis          |                       | MD               | Forsyth Medical Center                       | Winston-Salem, NC, US                    | Collaborator                                            |                                                                                            |
| Christina                         | Roels           |                       | Pharm D          | Forsyth Medical Center                       | Winston-Salem, NC, US                    | Collaborator                                            |                                                                                            |
| Prabhu                            | Emmady          |                       | MD               | Forsyth Medical Center                       | Winston-Salem, NC, US                    | Collaborator                                            |                                                                                            |
| Talat                             | Alvi            |                       | MD               | Forsyth Medical Center                       | Winston-Salem, NC, US                    | Collaborator                                            |                                                                                            |
| Mahesh V.                         | Jayaraman       |                       | MD               | Warren Alpert School of Medicine at Brown U  | Providence, RI, US                       | Collaborator                                            |                                                                                            |
| Shawna M.                         | Cutting         |                       | MD               | Warren Alpert School of Medicine at Brown U  | Providence, RI, US                       | Collaborator                                            |                                                                                            |
| Wendy J.                          | Smith           |                       | BS, RTRCV        | Warren Alpert School of Medicine at Brown U  | Providence, RI, US                       | Collaborator                                            |                                                                                            |
| Susan M.                          | Foley           |                       | RTRCV            | Warren Alpert School of Medicine at Brown U  | Providence, RI, US                       | Collaborator                                            |                                                                                            |
| Gino A.                           | Paolucci        |                       | NP               | Warren Alpert School of Medicine at Brown U  | Providence, RI, US                       | Collaborator                                            |                                                                                            |
| Richard A.                        | Haas            |                       | MD               | Warren Alpert School of Medicine at Brown U  | Providence, RI, US                       | Collaborator                                            |                                                                                            |
| Katie A.                          | Quinn           |                       | PA               | Warren Alpert School of Medicine at Brown U  | Providence, RI, US                       | Collaborator                                            |                                                                                            |
| Lindsey R.                        | Fuller          |                       | PA               | Warren Alpert School of Medicine at Brown U  | Providence, RI, US                       | Collaborator                                            |                                                                                            |
| Rebecca E.                        | Brierley        |                       | PA               | Warren Alpert School of Medicine at Brown U  | Providence, RI, US                       | Collaborator                                            |                                                                                            |

## Supplemental Online Content: Nonauthor Collaborators

\*Indicates required information. Only first name, last name, and suffix will appear in PubMed.

| *First Name and Middle Initial(s) | *Last Name  | *Suffix (eg, Jr, III) | Academic Degrees | Institution                                  | Location (city, state/province, country) | Role or Contribution, eg, chair, principal investigator | Group (if more than 1 Group listed in the byline and/or Subgroup (eg, Steering Committee)) |
|-----------------------------------|-------------|-----------------------|------------------|----------------------------------------------|------------------------------------------|---------------------------------------------------------|--------------------------------------------------------------------------------------------|
| Christina C.                      | Watkins     |                       | NP               | Warren Alpert School of Medicine at Brown U  | Providence, RI, US                       | Collaborator                                            |                                                                                            |
| Nicole C.                         | Demir       |                       | NP               | Warren Alpert School of Medicine at Brown U  | Providence, RI, US                       | Collaborator                                            |                                                                                            |
| George A.                         | Lopez       |                       | MD, PhD          | Swedish Neurological Institute               | Seattle, WA, US                          | Site PI                                                 |                                                                                            |
| Alejandro                         | Vargas      |                       | MD               | Rush University Medical Center               | Chicago, IL, US                          | Collaborator                                            |                                                                                            |
| Nicholas                          | Osteraas    |                       | MD               | Rush University Medical Center               | Chicago, IL, US                          | Collaborator                                            |                                                                                            |
| Becky                             | Holtz       |                       | RN               | Rush University Medical Center               | Chicago, IL, US                          | Collaborator                                            |                                                                                            |
| Eric                              | Sauvageau   |                       | MD               | Lyerly Neurosurgery, Baptist Hospital        | Jacksonville, FL, US                     | Site PI                                                 |                                                                                            |
| Amin                              | Aghaebrahim |                       | MD               | Lyerly Neurosurgery, Baptist Hospital        | Jacksonville, FL, US                     | Collaborator                                            |                                                                                            |
| Mohamad                           | Chmayssani  |                       | MD               | Lyerly Neurosurgery, Baptist Hospital        | Jacksonville, FL, US                     | Collaborator                                            |                                                                                            |
| Neeraj S.                         | Naval       |                       | MD               | Lyerly Neurosurgery, Baptist Hospital        | Jacksonville, FL, US                     | Collaborator                                            |                                                                                            |
| Jason S.                          | Day         |                       | MD               | Lyerly Neurosurgery, Baptist Hospital        | Jacksonville, FL, US                     | Collaborator                                            |                                                                                            |
| Scott M.                          | Dellorso    |                       | MD               | Lyerly Neurosurgery, Baptist Hospital        | Jacksonville, FL, US                     | Collaborator                                            |                                                                                            |
| Benjamin J.                       | Ludwig      |                       | MD               | Lyerly Neurosurgery, Baptist Hospital        | Jacksonville, FL, US                     | Collaborator                                            |                                                                                            |
| Derek J.                          | Schemmel    |                       | MD               | Lyerly Neurosurgery, Baptist Hospital        | Jacksonville, FL, US                     | Collaborator                                            |                                                                                            |
| Nancy                             | Ebreo       |                       | CCRC, RRT        | Lyerly Neurosurgery, Baptist Hospital        | Jacksonville, FL, US                     | Collaborator                                            |                                                                                            |
| Karen                             | Bell        |                       | BSH              | Lyerly Neurosurgery, Baptist Hospital        | Jacksonville, FL, US                     | Collaborator                                            |                                                                                            |
| Lanai                             | Lewis       |                       | CRC              | Lyerly Neurosurgery, Baptist Hospital        | Jacksonville, FL, US                     | Collaborator                                            |                                                                                            |
| Marjorie                          | Delucia     |                       | PharmD           | Lyerly Neurosurgery, Baptist Hospital        | Jacksonville, FL, US                     | Collaborator                                            |                                                                                            |
| Diogo                             | Hausen      |                       | MD               | Emory University School of Medicine, Grady M | Atlanta, GA, US                          | Collaborator                                            |                                                                                            |
| Michael                           | Frankel     |                       | MD               | Emory University School of Medicine, Grady M | Atlanta, GA, US                          | Collaborator                                            |                                                                                            |
| Nirav                             | Bhatt       |                       | MD               | Emory University School of Medicine, Grady M | Atlanta, GA, US                          | Collaborator                                            |                                                                                            |
| Nicolas                           | Bianchi     |                       | MD               | Emory University School of Medicine, Grady M | Atlanta, GA, US                          | Collaborator                                            |                                                                                            |
| Aaron                             | Anderson    |                       | MD               | Emory University School of Medicine, Grady M | Atlanta, GA, US                          | Collaborator                                            |                                                                                            |
| Samir                             | Belagaje    |                       | MD               | Emory University School of Medicine, Grady M | Atlanta, GA, US                          | Collaborator                                            |                                                                                            |
| Bernardo                          | Liberato    |                       | MD               | Emory University School of Medicine, Grady M | Atlanta, GA, US                          | Collaborator                                            |                                                                                            |
| Srikant                           | Rangaraju   |                       | MD               | Emory University School of Medicine, Grady M | Atlanta, GA, US                          | Collaborator                                            |                                                                                            |
| Alhamza R.                        | Al-Bayati   |                       | MD               | Emory University School of Medicine, Grady M | Atlanta, GA, US                          | Collaborator                                            |                                                                                            |
| Jonathan                          | Grossber    |                       | MD               | Emory University School of Medicine, Grady M | Atlanta, GA, US                          | Collaborator                                            |                                                                                            |
| Leah P.                           | Craft       |                       | RN, BSN, CCRC    | Emory University School of Medicine, Grady M | Atlanta, GA, US                          | Collaborator                                            |                                                                                            |
| Kiva                              | Schindler   |                       | RN, CCRC         | Emory University School of Medicine, Grady M | Atlanta, GA, US                          | Collaborator                                            |                                                                                            |
| Erin                              | Schaad      |                       | CRC              | Emory University School of Medicine, Grady M | Atlanta, GA, US                          | Collaborator                                            |                                                                                            |
| Meagan                            | Schultz     |                       | CRC              | Emory University School of Medicine, Grady M | Atlanta, GA, US                          | Collaborator                                            |                                                                                            |

Supplemental Online Content: Nonauthor Collaborators

\*Indicates required information. Only first name, last name, and suffix will appear in PubMed.

| *First Name and Middle Initial(s) | *Last Name         | *Suffix (eg, Jr, III) | Academic Degrees                 | Institution                                      | Location (city, state/province, country) | Role or Contribution, eg, chair, principal investigator | Group (if more than 1 Group listed in the byline and/or Subgroup (eg, Steering Committee)) |
|-----------------------------------|--------------------|-----------------------|----------------------------------|--------------------------------------------------|------------------------------------------|---------------------------------------------------------|--------------------------------------------------------------------------------------------|
| Loretta J.                        | Sutherly           |                       | MS, BSN, RN-BC, SCRN, NVRN, CCRC | Emory University School of Medicine, Grady M     | Atlanta, GA, US                          | Collaborator                                            |                                                                                            |
| Shannon                           | Doppelheuer        |                       | CCRC                             | Emory University School of Medicine, Grady M     | Atlanta, GA, US                          | Collaborator                                            |                                                                                            |
| Jacquelyn                         | Charlton           |                       | CRC                              | Emory University School of Medicine, Grady M     | Atlanta, GA, US                          | Collaborator                                            |                                                                                            |
| Jason                             | Faggard            |                       | RN                               | Emory University School of Medicine, Grady M     | Atlanta, GA, US                          | Collaborator                                            |                                                                                            |
| Zuzana                            | Barbret            |                       | RN                               | Emory University School of Medicine, Grady M     | Atlanta, GA, US                          | Collaborator                                            |                                                                                            |
| Ethan                             | DukSoo Han         |                       | RN                               | Emory University School of Medicine, Grady M     | Atlanta, GA, US                          | Collaborator                                            |                                                                                            |
| Robin                             | Walters            |                       | RN                               | Emory University School of Medicine, Grady M     | Atlanta, GA, US                          | Collaborator                                            |                                                                                            |
| Jaydevsinh                        | Dolia              |                       | MD                               | Emory University School of Medicine, Grady M     | Atlanta, GA, US                          | Collaborator                                            |                                                                                            |
| Sleiman                           | El-Jamal           |                       | MD                               | Emory University School of Medicine, Grady M     | Atlanta, GA, US                          | Collaborator                                            |                                                                                            |
| Brendan                           | Eby                |                       | MD                               | Emory University School of Medicine, Grady M     | Atlanta, GA, US                          | Collaborator                                            |                                                                                            |
| Yasir                             | Saleem             |                       | MD                               | Emory University School of Medicine, Grady M     | Atlanta, GA, US                          | Collaborator                                            |                                                                                            |
| Harrison                          | Pearl              |                       | MD                               | Emory University School of Medicine, Grady M     | Atlanta, GA, US                          | Collaborator                                            |                                                                                            |
| Kishan                            | Patel              |                       | MD                               | Emory University School of Medicine, Grady M     | Atlanta, GA, US                          | Collaborator                                            |                                                                                            |
| Haseeb                            | Rahman             |                       | MD                               | Emory University School of Medicine, Grady M     | Atlanta, GA, US                          | Collaborator                                            |                                                                                            |
| Reema                             | Butt               |                       | MD                               | Emory University School of Medicine, Grady M     | Atlanta, GA, US                          | Collaborator                                            |                                                                                            |
| Stephen                           | English            |                       | MD                               | Emory University School of Medicine, Grady M     | Atlanta, GA, US                          | Collaborator                                            |                                                                                            |
|                                   |                    |                       |                                  |                                                  |                                          |                                                         |                                                                                            |
| Ajit S.                           | Puri               |                       | MD                               | University of Massachusetts Medical Center       | Worcester, MA, US                        | Site PI                                                 |                                                                                            |
| Mary                              | Howk               |                       | MS                               | University of Massachusetts Medical Center       | Worcester, MA, US                        | Collaborator                                            |                                                                                            |
| Jasmeet                           | Singh              |                       | MD                               | University of Massachusetts Medical Center       | Worcester, MA, US                        | Collaborator                                            |                                                                                            |
| Francesco                         | Massari            |                       | MD, PhD                          | University of Massachusetts Medical Center       | Worcester, MA, US                        | Collaborator                                            |                                                                                            |
| Katyucia                          | DeMacedo Rodrigues |                       | MD                               | University of Massachusetts Medical Center       | Worcester, MA, US                        | Collaborator                                            |                                                                                            |
| Anna L.                           | Kuhn               |                       | MD, PhD                          | University of Massachusetts Medical Center       | Worcester, MA, US                        | Collaborator                                            |                                                                                            |
|                                   |                    |                       |                                  |                                                  |                                          |                                                         |                                                                                            |
| Joey D.                           | English            |                       | MD                               | California Pacific Medical Center, Sutter Health | San Francisco, CA, US                    | Site PI                                                 |                                                                                            |
| Nobl                              | Barazangi          |                       | MD                               | California Pacific Medical Center, Sutter Health | San Francisco, CA, US                    | Collaborator                                            |                                                                                            |
| Nick                              | Telischak          |                       | MD                               | California Pacific Medical Center, Sutter Health | San Francisco, CA, US                    | Collaborator                                            |                                                                                            |
| Warren                            | Kim                |                       | MD                               | California Pacific Medical Center, Sutter Health | San Francisco, CA, US                    | Collaborator                                            |                                                                                            |
| Josh                              | Ross               |                       | RN                               | California Pacific Medical Center, Sutter Health | San Francisco, CA, US                    | Collaborator                                            |                                                                                            |
| Nata                              | DeVole             |                       | RN                               | California Pacific Medical Center, Sutter Health | San Francisco, CA, US                    | Collaborator                                            |                                                                                            |
| Jessica                           | Redford            |                       | RN                               | California Pacific Medical Center, Sutter Health | San Francisco, CA, US                    | Collaborator                                            |                                                                                            |
| Melina                            | Ferreira           |                       |                                  | California Pacific Medical Center, Sutter Health | San Francisco, CA, US                    | Collaborator                                            |                                                                                            |
| Katie                             | Ponting            |                       |                                  | California Pacific Medical Center, Sutter Health | San Francisco, CA, US                    | Collaborator                                            |                                                                                            |

## Supplemental Online Content: Nonauthor Collaborators

\*Indicates required information. Only first name, last name, and suffix will appear in PubMed.

| *First Name and Middle Initial(s) | *Last Name | *Suffix (eg, Jr, III) | Academic Degrees | Institution                                      | Location (city, state/province, country) | Role or Contribution, eg, chair, principal investigator | Group (if more than 1 Group listed in the byline and/or Subgroup (eg, Steering Committee)) |
|-----------------------------------|------------|-----------------------|------------------|--------------------------------------------------|------------------------------------------|---------------------------------------------------------|--------------------------------------------------------------------------------------------|
| Helen                             | Shen       |                       |                  | California Pacific Medical Center, Sutter Health | San Francisco, CA, US                    | Collaborator                                            |                                                                                            |
| Ann                               | Bedenk     |                       | RN               | California Pacific Medical Center, Sutter Health | San Francisco, CA, US                    | Collaborator                                            |                                                                                            |
| Susila                            | Patel      |                       | RN               | California Pacific Medical Center, Sutter Health | San Francisco, CA, US                    | Collaborator                                            |                                                                                            |
| Julia                             | Fernandess |                       | RN               | California Pacific Medical Center, Sutter Health | San Francisco, CA, US                    | Collaborator                                            |                                                                                            |
| Michael                           | Ke         |                       | MD               | California Pacific Medical Center, Sutter Health | San Francisco, CA, US                    | Collaborator                                            |                                                                                            |
| Illanit                           | Spokoyny   |                       | MD               | California Pacific Medical Center, Sutter Health | San Francisco, CA, US                    | Collaborator                                            |                                                                                            |
| Billy                             | Gao        |                       | MD               | California Pacific Medical Center, Sutter Health | San Francisco, CA, US                    | Collaborator                                            |                                                                                            |
| David                             | Tong       |                       | MD               | California Pacific Medical Center, Sutter Health | San Francisco, CA, US                    | Collaborator                                            |                                                                                            |
| Charlene                          | Chen       |                       | MD               | California Pacific Medical Center, Sutter Health | San Francisco, CA, US                    | Collaborator                                            |                                                                                            |
| Christine                         | Wong       |                       | MD               | California Pacific Medical Center, Sutter Health | San Francisco, CA, US                    | Collaborator                                            |                                                                                            |
| Jessica                           | Choe       |                       | MD               | California Pacific Medical Center, Sutter Health | San Francisco, CA, US                    | Collaborator                                            |                                                                                            |
|                                   |            |                       |                  |                                                  |                                          |                                                         |                                                                                            |
| Coleman O                         | Martin     |                       | MD               | Saint Luke's Hospital of Kansas City             | Kansas City, MO, US                      | Site PI                                                 |                                                                                            |
| Debbie V.                         | Summers    |                       | MSN              | Saint Luke's Hospital of Kansas City             | Kansas City, MO, US                      | Collaborator                                            |                                                                                            |
| Christine M.                      | Boutwell   |                       | MD               | Saint Luke's Hospital of Kansas City             | Kansas City, MO, US                      | Collaborator                                            |                                                                                            |
| Karin E.                          | Olds       |                       | MD               | Saint Luke's Hospital of Kansas City             | Kansas City, MO, US                      | Collaborator                                            |                                                                                            |
| Suzanne C.                        | Crandall   |                       | MD               | Saint Luke's Hospital of Kansas City             | Kansas City, MO, US                      | Collaborator                                            |                                                                                            |
| John D.                           | Eatman     |                       | MD               | Saint Luke's Hospital of Kansas City             | Kansas City, MO, US                      | Collaborator                                            |                                                                                            |
| Naveed                            | Akhtar     |                       | MD               | Saint Luke's Hospital of Kansas City             | Kansas City, MO, US                      | Collaborator                                            |                                                                                            |
| William                           | Holloway   |                       | MD               | Saint Luke's Hospital of Kansas City             | Kansas City, MO, US                      | Collaborator                                            |                                                                                            |
| Jared S.                          | Halpin     |                       | MD               | Saint Luke's Hospital of Kansas City             | Kansas City, MO, US                      | Collaborator                                            |                                                                                            |
| Brett                             | Donegan    |                       | MD               | Saint Luke's Hospital of Kansas City             | Kansas City, MO, US                      | Collaborator                                            |                                                                                            |
|                                   |            |                       |                  |                                                  |                                          |                                                         |                                                                                            |
| Joseph L.                         | Schindler  |                       | MD               | Yale University School of Medicine               | New Haven, CT, US                        | Site PI                                                 |                                                                                            |
| Daiv Y.                           | Hwang      |                       | MD               | Yale University School of Medicine               | New Haven, CT, US                        | Collaborator                                            |                                                                                            |
| Emily J.                          | Gilmore    |                       | MD               | Yale University School of Medicine               | New Haven, CT, US                        | Collaborator                                            |                                                                                            |
| Nils                              | Petersen   |                       | MD               | Yale University School of Medicine               | New Haven, CT, US                        | Collaborator                                            |                                                                                            |
| Kevin N.                          | Sheth      |                       | MD               | Yale University School of Medicine               | New Haven, CT, US                        | Collaborator                                            |                                                                                            |
| Stacy Y.                          | Brown      |                       | MD               | Yale University School of Medicine               | New Haven, CT, US                        | Collaborator                                            |                                                                                            |
| Rachel B.                         | Beekman    |                       | MD               | Yale University School of Medicine               | New Haven, CT, US                        | Collaborator                                            |                                                                                            |
| Benjamin P.                       | George     |                       | MD               | Yale University School of Medicine               | New Haven, CT, US                        | Collaborator                                            |                                                                                            |
| Firas                             | Kaddouh    |                       | MD               | Yale University School of Medicine               | New Haven, CT, US                        | Collaborator                                            |                                                                                            |
| Guido J.                          | Falcone    |                       | MD               | Yale University School of Medicine               | New Haven, CT, US                        | Collaborator                                            |                                                                                            |
| Charles R.                        | Wira       |                       | MD               | Yale University School of Medicine               | New Haven, CT, US                        | Collaborator                                            |                                                                                            |
| Charles C.                        | Matouk     |                       | MD               | Yale University School of Medicine               | New Haven, CT, US                        | Collaborator                                            |                                                                                            |
| Caitlin                           | Loomis     |                       | MD               | Yale University School of Medicine               | New Haven, CT, US                        | Collaborator                                            |                                                                                            |



Supplemental Online Content: Nonauthor Collaborators

\*Indicates required information. Only first name, last name, and suffix will appear in PubMed.

| *First Name and Middle Initial(s) | *Last Name | *Suffix (eg, Jr, III) | Academic Degrees               | Institution                                  | Location (city, state/province, country) | Role or Contribution, eg, chair, principal investigator | Group (if more than 1 Group listed in the byline and/or Subgroup (eg, Steering Committee)) |
|-----------------------------------|------------|-----------------------|--------------------------------|----------------------------------------------|------------------------------------------|---------------------------------------------------------|--------------------------------------------------------------------------------------------|
| Hardik                            | Amin       |                       | MD                             | Yale University School of Medicine           | New Haven, CT, US                        | Collaborator                                            |                                                                                            |
| Hans Christoph                    | Stretz     |                       | MD                             | Yale University School of Medicine           | New Haven, CT, US                        | Collaborator                                            |                                                                                            |
| Reshma                            | Narula     |                       | MD                             | Yale University School of Medicine           | New Haven, CT, US                        | Collaborator                                            |                                                                                            |
| Adam S.                           | Jasne      |                       | MD                             | Yale University School of Medicine           | New Haven, CT, US                        | Collaborator                                            |                                                                                            |
| Lauren H.                         | Sansing    |                       | MD                             | Yale University School of Medicine           | New Haven, CT, US                        | Collaborator                                            |                                                                                            |
| Tijil                             | Agarwal    |                       | MD                             | Yale University School of Medicine           | New Haven, CT, US                        | Collaborator                                            |                                                                                            |
| Sara D.                           | Jasak      |                       | BSN                            | Yale University School of Medicine           | New Haven, CT, US                        | Collaborator                                            |                                                                                            |
| Briana D.                         | Fontaine   |                       | BA                             | Yale University School of Medicine           | New Haven, CT, US                        | Collaborator                                            |                                                                                            |
| Zachary                           | King       |                       | BA                             | Yale University School of Medicine           | New Haven, CT, US                        | Collaborator                                            |                                                                                            |
| Lindsey R.                        | Kouhn      |                       | BA                             | Yale University School of Medicine           | New Haven, CT, US                        | Collaborator                                            |                                                                                            |
| Hailey                            | Orgass     |                       | BA                             | Yale University School of Medicine           | New Haven, CT, US                        | Collaborator                                            |                                                                                            |
| Megan A.                          | Leary      |                       | BS                             | Yale University School of Medicine           | New Haven, CT, US                        | Collaborator                                            |                                                                                            |
| Joan L.                           | Nye        |                       | BS                             | Yale University School of Medicine           | New Haven, CT, US                        | Collaborator                                            |                                                                                            |
| Kelsey                            | Halbert    |                       | RN, BSN, MSN, CNL, SCRNP, CNRN | Yale University School of Medicine           | New Haven, CT, US                        | Collaborator                                            |                                                                                            |
| Karin V.                          | Nystrom    |                       | MSN, APRN, FAHA                | Yale University School of Medicine           | New Haven, CT, US                        | Collaborator                                            |                                                                                            |
| Kaile B.                          | Neuschatz  |                       | BSN, SCRNP                     | Yale University School of Medicine           | New Haven, CT, US                        | Collaborator                                            |                                                                                            |
| Dawn M.                           | Petrucci   |                       | BSN, SCRNP                     | Yale University School of Medicine           | New Haven, CT, US                        | Collaborator                                            |                                                                                            |
| Anna M.                           | Coppola    |                       | BS, RN                         | Yale University School of Medicine           | New Haven, CT, US                        | Collaborator                                            |                                                                                            |
| Treasure A.                       | Joyce      |                       | LVN                            | Providence Little Company of Mary Medical Ce | Torrance, CA, US                         | Collaborator                                            |                                                                                            |
| Sam Y.                            | Hou        |                       | MD, PhD                        | Providence Little Company of Mary Medical Ce | Torrance, CA, US                         | Collaborator                                            |                                                                                            |
| Mark S.                           | Umekubo    |                       | Pharm D, BCCP                  | Providence Little Company of Mary Medical Ce | Torrance, CA, US                         | Collaborator                                            |                                                                                            |
| Catrice M.                        | Nakamura   |                       | MSN, SCRNP                     | Providence Little Company of Mary Medical Ce | Torrance, CA, US                         | Collaborator                                            |                                                                                            |
| Renee M.                          | Ovando     |                       | NP, SCRNP                      | Providence Little Company of Mary Medical Ce | Torrance, CA, US                         | Collaborator                                            |                                                                                            |
| Diana                             | Zuniga     |                       | LVN                            | Providence Little Company of Mary Medical Ce | Torrance, CA, US                         | Collaborator                                            |                                                                                            |
| Yih Lin                           | Nien       |                       | MD                             | Providence Little Company of Mary Medical Ce | Torrance, CA, US                         | Collaborator                                            |                                                                                            |
| Fernando Mayor                    | Basto      |                       | MD                             | Providence Little Company of Mary Medical Ce | Torrance, CA, US                         | Collaborator                                            |                                                                                            |
| Allison E.                        | Arch       |                       | MD                             | Providence Little Company of Mary Medical Ce | Torrance, CA, US                         | Collaborator                                            |                                                                                            |
| Laura T.                          | Jong       |                       | MD                             | Providence Little Company of Mary Medical Ce | Torrance, CA, US                         | Collaborator                                            |                                                                                            |
| William A.                        | Conrad     |                       | MD                             | Providence Little Company of Mary Medical Ce | Torrance, CA, US                         | Collaborator                                            |                                                                                            |
| Tara C.                           | Abbott     |                       | BSN                            | Providence Little Company of Mary Medical Ce | Torrance, CA, US                         | Collaborator                                            |                                                                                            |
| Jay Z.                            | Yao        |                       | MD                             | Providence Little Company of Mary Medical Ce | Torrance, CA, US                         | Collaborator                                            |                                                                                            |

## Supplemental Online Content: Nonauthor Collaborators

\*Indicates required information. Only first name, last name, and suffix will appear in PubMed.

| *First Name and Middle Initial(s) | *Last Name | *Suffix (eg, Jr, III) | Academic Degrees | Institution                                  | Location (city, state/province, country) | Role or Contribution, eg, chair, principal investigator | Group (if more than 1 Group listed in the byline and/or Subgroup (eg, Steering Committee)) |
|-----------------------------------|------------|-----------------------|------------------|----------------------------------------------|------------------------------------------|---------------------------------------------------------|--------------------------------------------------------------------------------------------|
| Scott D.                          | Caganap    |                       | MD               | Providence Little Company of Mary Medical Ce | Torrance, CA, US                         | Collaborator                                            |                                                                                            |
| John E.                           | Jordan     |                       | MD               | Providence Little Company of Mary Medical Ce | Torrance, CA, US                         | Collaborator                                            |                                                                                            |
| George P.                         | Teitelbaum |                       | MD               | Providence Little Company of Mary Medical Ce | Torrance, CA, US                         | Collaborator                                            |                                                                                            |
| Robert J.                         | Darflinger |                       | MD               | Providence Little Company of Mary Medical Ce | Torrance, CA, US                         | Collaborator                                            |                                                                                            |
| Daniel F.                         | Kelly      |                       | MD               | Providence Little Company of Mary Medical Ce | Torrance, CA, US                         | Collaborator                                            |                                                                                            |
|                                   |            |                       |                  |                                              |                                          |                                                         |                                                                                            |
| Rishi                             | Gupta      |                       | MD               | Wellstar Health System, Kennestone Hospital  | Marietta, GA, US                         | Site PI                                                 |                                                                                            |
|                                   |            |                       |                  |                                              |                                          |                                                         |                                                                                            |
| Ronald F.                         | Budzik     |                       | MD               | Ohio Health, Riverside Methodist Hospital    | Columbus, OH, US                         | Site PI                                                 |                                                                                            |
| Jennifer H.                       | Czerniak   |                       | RN               | Ohio Health, Riverside Methodist Hospital    | Columbus, OH, US                         | Collaborator                                            |                                                                                            |
| Katherine M.                      | Groezinger |                       | BSN, RN, SCR N   | Ohio Health, Riverside Methodist Hospital    | Columbus, OH, US                         | Collaborator                                            |                                                                                            |
| William J.                        | Hicks      | II                    | MD               | Ohio Health, Riverside Methodist Hospital    | Columbus, OH, US                         | Collaborator                                            |                                                                                            |
| Omran B.                          | Kaskar     |                       | DO               | Ohio Health, Riverside Methodist Hospital    | Columbus, OH, US                         | Collaborator                                            |                                                                                            |
| Brian S.                          | Katz       |                       | MD               | Ohio Health, Riverside Methodist Hospital    | Columbus, OH, US                         | Collaborator                                            |                                                                                            |
| Aaron I.                          | Loochtan   |                       | DO               | Ohio Health, Riverside Methodist Hospital    | Columbus, OH, US                         | Collaborator                                            |                                                                                            |
| Peter J.                          | Pema       |                       | MD               | Ohio Health, Riverside Methodist Hospital    | Columbus, OH, US                         | Collaborator                                            |                                                                                            |
| Vivek                             | Rai        |                       | MD               | Ohio Health, Riverside Methodist Hospital    | Columbus, OH, US                         | Collaborator                                            |                                                                                            |
| Nirav A.                          | Vora       |                       | MD               | Ohio Health, Riverside Methodist Hospital    | Columbus, OH, US                         | Collaborator                                            |                                                                                            |
| Amanda                            | Brown      |                       | MPH              | Ohio Health, Riverside Methodist Hospital    | Columbus, OH, US                         | Collaborator                                            |                                                                                            |
| Diane                             | Goodman    |                       |                  | Ohio Health, Riverside Methodist Hospital    | Columbus, OH, US                         | Collaborator                                            |                                                                                            |
| Barb                              | Danenbergs |                       | RPh, CCRP        | Ohio Health, Riverside Methodist Hospital    | Columbus, OH, US                         | Collaborator                                            |                                                                                            |
| Monica                            | Gossett    |                       | Pharm D          | Ohio Health, Riverside Methodist Hospital    | Columbus, OH, US                         | Collaborator                                            |                                                                                            |
|                                   |            |                       |                  |                                              |                                          |                                                         |                                                                                            |
| Oh Young                          | Bang       |                       | MD               | Samsung Medical Center, Departments of Neu   | Seoul, South Korea                       | Site PI                                                 |                                                                                            |
| Jong-Won                          | Chung      |                       | MD, PhD          | Samsung Medical Center, Departments of Neu   | Seoul, South Korea                       | Collaborator                                            |                                                                                            |
| Pyoung                            | Jeon       |                       | MD, PhD          | Samsung Medical Center, Departments of Neu   | Seoul, South Korea                       | Collaborator                                            |                                                                                            |
| Keon Ha                           | Kim        |                       | MD, PhD          | Samsung Medical Center, Departments of Neu   | Seoul, South Korea                       | Collaborator                                            |                                                                                            |
| Yun Jeong                         | Lim        |                       | RN               | Samsung Medical Center, Departments of Neu   | Seoul, South Korea                       | Collaborator                                            |                                                                                            |
|                                   |            |                       |                  |                                              |                                          |                                                         |                                                                                            |
| Ji                                | Hoe Heo    |                       | MD               | Yonsei University College of Medicine        | Seoul, South Korea                       | Site PI                                                 |                                                                                            |
| Hyo Suk                           | Nam        |                       | MD, PhD          | Yonsei University College of Medicine        | Seoul, South Korea                       | Collaborator                                            |                                                                                            |
| Young Dae                         | Kim        |                       | MD, PhD          | Yonsei University College of Medicine        | Seoul, South Korea                       | Collaborator                                            |                                                                                            |
| HyungJong                         | Park       |                       | MD               | Yonsei University College of Medicine        | Seoul, South Korea                       | Collaborator                                            |                                                                                            |
| In Gun                            | Hwang      |                       | MD               | Yonsei University College of Medicine        | Seoul, South Korea                       | Collaborator                                            |                                                                                            |

## Supplemental Online Content: Nonauthor Collaborators

\*Indicates required information. Only first name, last name, and suffix will appear in PubMed.

| *First Name and Middle Initial(s) | *Last Name | *Suffix (eg, Jr, III) | Academic Degrees | Institution                                   | Location (city, state/province, country) | Role or Contribution, eg, chair, principal investigator | Group (if more than 1 Group listed in the byline and/or Subgroup (eg, Steering Committee)) |
|-----------------------------------|------------|-----------------------|------------------|-----------------------------------------------|------------------------------------------|---------------------------------------------------------|--------------------------------------------------------------------------------------------|
| Wooseok                           | Ha         |                       | MD               | Yonsei University College of Medicine         | Seoul, South Korea                       | Collaborator                                            |                                                                                            |
| Jin Kyo                           | Choi       |                       | MD               | Yonsei University College of Medicine         | Seoul, South Korea                       | Collaborator                                            |                                                                                            |
| Kyungsun                          | Jeong      |                       | RN               | Yonsei University College of Medicine         | Seoul, South Korea                       | Collaborator                                            |                                                                                            |
| Joung-Ho                          | Rha        |                       | MD               | Inha University Hospital Neurology            | Incheon, South Korea                     | Site PI                                                 |                                                                                            |
| Hee-Kwon                          | Park       |                       | MD               | Inha University Hospital Neurology            | Incheon, South Korea                     | Collaborator                                            |                                                                                            |
| Cindy W.                          | Yoon       |                       | MD               | Inha University Hospital Neurology            | Incheon, South Korea                     | Collaborator                                            |                                                                                            |
| Bo-Kyung                          | Kim        |                       | RN               | Inha University Hospital Neurology            | Incheon, South Korea                     | Collaborator                                            |                                                                                            |
| Sung-Il                           | Sohn       |                       | MD               | Dongsan Hospital, Keimyung University School  | Daegu, South Korea                       | Site PI                                                 |                                                                                            |
| Chang-Hyun                        | Kim        |                       | MD               | Dongsan Hospital, Keimyung University School  | Daegu, South Korea                       | Site PI                                                 |                                                                                            |
| Joonsang                          | Yoo        |                       | MD               | Dongsan Hospital, Keimyung University School  | Daegu, South Korea                       | Collaborator                                            |                                                                                            |
| Jeong-Ho                          | Hong       |                       | MD, PhD          | Dongsan Hospital, Keimyung University School  | Daegu, South Korea                       | Collaborator                                            |                                                                                            |
| Hyungjong                         | Park       |                       | MD               | Dongsan Hospital, Keimyung University School  | Daegu, South Korea                       | Collaborator                                            |                                                                                            |
| Sohyeon                           | Kim        |                       | MD               | Dongsan Hospital, Keimyung University School  | Daegu, South Korea                       | Collaborator                                            |                                                                                            |
| Moonkyung                         | Choi       |                       | MD               | Dongsan Hospital, Keimyung University School  | Daegu, South Korea                       | Collaborator                                            |                                                                                            |
| Hyo Eun                           | Bae        |                       | MD               | Dongsan Hospital, Keimyung University School  | Daegu, South Korea                       | Collaborator                                            |                                                                                            |
| Jun Seok                          | Lee        |                       | MD               | Dongsan Hospital, Keimyung University School  | Daegu, South Korea                       | Collaborator                                            |                                                                                            |
| Jae-Joon                          | Lee        |                       | MD               | Dongsan Hospital, Keimyung University School  | Daegu, South Korea                       | Collaborator                                            |                                                                                            |
| Go-Eun                            | Jun        |                       | BA (CRA)         | Dongsan Hospital, Keimyung University School  | Daegu, South Korea                       | Collaborator                                            |                                                                                            |
| Sujeong                           | Jeon       |                       | BA (CRA)         | Dongsan Hospital, Keimyung University School  | Daegu, South Korea                       | Collaborator                                            |                                                                                            |
| Bruce C. V.                       | Campbell   |                       | PhD              | The Royal Melbourne Hospital, University of M | Parkville, Victoria, Austr               | Site PI                                                 |                                                                                            |
| Peter J.                          | Mitchell   |                       | Mmed             | The Royal Melbourne Hospital, University of M | Parkville, Victoria, Austr               | Collaborator                                            |                                                                                            |
| Nawaf                             | Yassi      |                       | PhD              | The Royal Melbourne Hospital, University of M | Parkville, Victoria, Austr               | Collaborator                                            |                                                                                            |
| Stephen M.                        | Davis      |                       | MD               | The Royal Melbourne Hospital, University of M | Parkville, Victoria, Austr               | Collaborator                                            |                                                                                            |
| Geoffrey A.                       | Donnan     |                       | MD               | The Royal Melbourne Hospital, University of M | Parkville, Victoria, Austr               | Collaborator                                            |                                                                                            |
| Mark W.                           | Parsons    |                       | PhD              | The Royal Melbourne Hospital, University of M | Parkville, Victoria, Austr               | Collaborator                                            |                                                                                            |
| Bernard                           | Yan        |                       | DMedSc           | The Royal Melbourne Hospital, University of M | Parkville, Victoria, Austr               | Collaborator                                            |                                                                                            |
| Richard J.                        | Dowling    |                       | MBBS             | The Royal Melbourne Hospital, University of M | Parkville, Victoria, Austr               | Collaborator                                            |                                                                                            |
| Steven J.                         | Bush       |                       | MBBS             | The Royal Melbourne Hospital, University of M | Parkville, Victoria, Austr               | Collaborator                                            |                                                                                            |
| Teddy Y.                          | Wu         |                       | PhD              | The Royal Melbourne Hospital, University of M | Parkville, Victoria, Austr               | Collaborator                                            |                                                                                            |
| Darshan G.                        | Shan       |                       | MBBS             | The Royal Melbourne Hospital, University of M | Parkville, Victoria, Austr               | Collaborator                                            |                                                                                            |
| Henry                             | Zhao       |                       | MBBS             | The Royal Melbourne Hospital, University of M | Parkville, Victoria, Austr               | Collaborator                                            |                                                                                            |
| Patrick                           | Salvaris   |                       | MBBS             | The Royal Melbourne Hospital, University of M | Parkville, Victoria, Austr               | Collaborator                                            |                                                                                            |
| Fana                              | Alemseged  |                       | MD               | The Royal Melbourne Hospital, University of M | Parkville, Victoria, Austr               | Collaborator                                            |                                                                                            |

Supplemental Online Content: Nonauthor Collaborators

\*Indicates required information. Only first name, last name, and suffix will appear in PubMed.

| *First Name and Middle Initial(s) | *Last Name | *Suffix (eg, Jr, III) | Academic Degrees           | Institution                                   | Location (city, state/province, country) | Role or Contribution, eg, chair, principal investigator | Group (if more than 1 Group listed in the byline and/or Subgroup (eg, Steering Committee)) |
|-----------------------------------|------------|-----------------------|----------------------------|-----------------------------------------------|------------------------------------------|---------------------------------------------------------|--------------------------------------------------------------------------------------------|
| Felix C.                          | Ng         |                       | MBBS                       | The Royal Melbourne Hospital, University of M | Parkville, Victoria, Austr               | Collaborator                                            |                                                                                            |
| Cameron                           | Williams   |                       | MBBS                       | The Royal Melbourne Hospital, University of M | Parkville, Victoria, Austr               | Collaborator                                            |                                                                                            |
| Anna                              | Balabanski |                       | MBBS                       | The Royal Melbourne Hospital, University of M | Parkville, Victoria, Austr               | Collaborator                                            |                                                                                            |
| Angela                            | dos Santos |                       | MBBS                       | The Royal Melbourne Hospital, University of M | Parkville, Victoria, Austr               | Collaborator                                            |                                                                                            |
| Jo-Lyn                            | Ng         |                       | MBBS                       | The Royal Melbourne Hospital, University of M | Parkville, Victoria, Austr               | Collaborator                                            |                                                                                            |
| Amy                               | McDonald   |                       | BN                         | The Royal Melbourne Hospital, University of M | Parkville, Victoria, Austr               | Collaborator                                            |                                                                                            |
| David                             | Jackson    |                       | BN                         | The Royal Melbourne Hospital, University of M | Parkville, Victoria, Austr               | Collaborator                                            |                                                                                            |
| Jessica                           | Tsoleridis |                       | BN                         | The Royal Melbourne Hospital, University of M | Parkville, Victoria, Austr               | Collaborator                                            |                                                                                            |
| Lauren                            | Pesavento  |                       | BN                         | The Royal Melbourne Hospital, University of M | Parkville, Victoria, Austr               | Collaborator                                            |                                                                                            |
|                                   |            |                       |                            |                                               |                                          |                                                         |                                                                                            |
| Timothy John                      | Kleinig    |                       | PhD                        | Royal Adelaide Hospital                       | Port Road, Adelaide Sout                 | Site PI                                                 |                                                                                            |
| Roy                               | Drew       |                       | B Nurs                     | Royal Adelaide Hospital                       | Port Road, Adelaide Sout                 | Collaborator                                            |                                                                                            |
| Jennifer                          | Cranefield |                       | M Nurs                     | Royal Adelaide Hospital                       | Port Road, Adelaide Sout                 | Collaborator                                            |                                                                                            |
| Rebecca                           | Scroop     |                       | MBBS                       | Royal Adelaide Hospital                       | Port Road, Adelaide Sout                 | Collaborator                                            |                                                                                            |
| Lavenia                           | Cagi       |                       | MBBS                       | Royal Adelaide Hospital                       | Port Road, Adelaide Sout                 | Collaborator                                            |                                                                                            |
| Jackson                           | Harvey     |                       | MBBS                       | Royal Adelaide Hospital                       | Port Road, Adelaide Sout                 | Collaborator                                            |                                                                                            |
| Michael J.                        | Waters     |                       |                            | Royal Adelaide Hospital                       | Port Road, Adelaide Sout                 | Collaborator                                            |                                                                                            |
|                                   |            |                       |                            |                                               |                                          |                                                         |                                                                                            |
| John                              | Thornton   |                       | MD                         | Beaumont Hospital                             | Dublin, Ireland                          | Site PI                                                 |                                                                                            |
| Robert P.                         | Brennan    |                       | MD RCSI                    | Beaumont Hospital                             | Dublin, Ireland                          | Collaborator                                            |                                                                                            |
| Alan                              | O'Hare     |                       | MD                         | Beaumont Hospital                             | Dublin, Ireland                          | Collaborator                                            |                                                                                            |
| Sarah                             | Power      |                       | PhD                        | Beaumont Hospital                             | Dublin, Ireland                          | Collaborator                                            |                                                                                            |
| David JP                          | Williams   |                       | PhD RCSI                   | Beaumont Hospital                             | Dublin, Ireland                          | Collaborator                                            |                                                                                            |
| Karl                              | Boyle      |                       | MD                         | Beaumont Hospital                             | Dublin, Ireland                          | Collaborator                                            |                                                                                            |
| Barry J.                          | Moynihan   |                       | MD RCSI                    | Beaumont Hospital                             | Dublin, Ireland                          | Collaborator                                            |                                                                                            |
| Ann-Marie                         | Liddy      |                       | MRCPI, PhD                 | Beaumont Hospital                             | Dublin, Ireland                          | Collaborator                                            |                                                                                            |
| Margaret                          | Large      |                       | Bsc, RCSI                  | Beaumont Hospital                             | Dublin, Ireland                          | Collaborator                                            |                                                                                            |
| Ailbhe                            | Cullen     |                       | RGN, RSCN, MSc RCSI        | Beaumont Hospital                             | Dublin, Ireland                          | Collaborator                                            |                                                                                            |
| Roisin                            | Walsh      |                       | RGN, Hdip, Pgrad, MSc RCSI | Beaumont Hospital                             | Dublin, Ireland                          | Collaborator                                            |                                                                                            |
| Emma                              | Martin     |                       | Bsc, Pgdip                 | Beaumont Hospital                             | Dublin, Ireland                          | Collaborator                                            |                                                                                            |
| Julie                             | Lynch      |                       | RGN, MSc                   | Beaumont Hospital                             | Dublin, Ireland                          | Collaborator                                            |                                                                                            |
| Sinéad                            | McElroy    |                       |                            | Beaumont Hospital                             | Dublin, Ireland                          | Collaborator                                            |                                                                                            |
|                                   |            |                       |                            |                                               |                                          |                                                         |                                                                                            |

Supplemental Online Content: Nonauthor Collaborators

\*Indicates required information. Only first name, last name, and suffix will appear in PubMed.

| *First Name and Middle Initial(s) | *Last Name    | *Suffix (eg, Jr, III) | Academic Degrees | Institution                             | Location (city, state/province, country) | Role or Contribution, eg, chair, principal investigator | Group (if more than 1 Group listed in the byline) and/or Subgroup (eg, Steering Committee) |
|-----------------------------------|---------------|-----------------------|------------------|-----------------------------------------|------------------------------------------|---------------------------------------------------------|--------------------------------------------------------------------------------------------|
| Seán                              | Murphy        |                       | MD               | Mater Misericordiae University Hospital | Dublin, Ireland                          | Site PI                                                 |                                                                                            |
| Sarah A.                          | Coveney       |                       | MRCPI            | Mater Misericordiae University Hospital | Dublin, Ireland                          | Collaborator                                            |                                                                                            |
| Caroline                          | Deegan        |                       |                  | Mater Misericordiae University Hospital | Dublin, Ireland                          | Collaborator                                            |                                                                                            |
| Gillian                           | Horgan        |                       | BSc              | Mater Misericordiae University Hospital | Dublin, Ireland                          | Collaborator                                            |                                                                                            |
| Peter                             | Kelly         |                       | MD               | Mater Misericordiae University Hospital | Dublin, Ireland                          | Collaborator                                            |                                                                                            |
| Aoife                             | Laffan        |                       | MD               | Mater Misericordiae University Hospital | Dublin, Ireland                          | Collaborator                                            |                                                                                            |
| Yudy                              | Llamas-Osorio |                       | MD               | Mater Misericordiae University Hospital | Dublin, Ireland                          | Collaborator                                            |                                                                                            |
| Catherine T.                      | Lynch         |                       | BSN              | Mater Misericordiae University Hospital | Dublin, Ireland                          | Collaborator                                            |                                                                                            |
| Peter J.                          | Mac Mahon     |                       | FFR(RCSI)        | Mater Misericordiae University Hospital | Dublin, Ireland                          | Collaborator                                            |                                                                                            |
| Michael                           | Marnane       |                       | MB PhD           | Mater Misericordiae University Hospital | Dublin, Ireland                          | Collaborator                                            |                                                                                            |
| John J.                           | McCabe        |                       | MRCPI            | Mater Misericordiae University Hospital | Dublin, Ireland                          | Collaborator                                            |                                                                                            |
|                                   |               |                       |                  |                                         |                                          |                                                         |                                                                                            |
| Paul A.                           | Burns         |                       | MB               | Royal Victoria Hospital                 | Belfast, Northern Ireland                | Site PI                                                 |                                                                                            |
| Suzanne                           | Tauro         |                       |                  | Royal Victoria Hospital                 | Belfast, Northern Ireland                | Collaborator                                            |                                                                                            |
| Sarah                             | Cuddy         |                       |                  | Royal Victoria Hospital                 | Belfast, Northern Ireland                | Collaborator                                            |                                                                                            |
| Ian                               | Rennie        |                       |                  | Royal Victoria Hospital                 | Belfast, Northern Ireland                | Collaborator                                            |                                                                                            |
| Graham                            | Smyth         |                       |                  | Royal Victoria Hospital                 | Belfast, Northern Ireland                | Collaborator                                            |                                                                                            |
| Peter                             | Flynn         |                       |                  | Royal Victoria Hospital                 | Belfast, Northern Ireland                | Collaborator                                            |                                                                                            |
| Ivan                              | Wiggam        |                       |                  | Royal Victoria Hospital                 | Belfast, Northern Ireland                | Collaborator                                            |                                                                                            |
| Enda                              | Kerr          |                       |                  | Royal Victoria Hospital                 | Belfast, Northern Ireland                | Collaborator                                            |                                                                                            |
| Patricia                          | Gordon        |                       |                  | Royal Victoria Hospital                 | Belfast, Northern Ireland                | Collaborator                                            |                                                                                            |
| Patricia                          | Fearon        |                       |                  | Royal Victoria Hospital                 | Belfast, Northern Ireland                | Collaborator                                            |                                                                                            |
| Geralt                            | Roberts       |                       |                  | Royal Victoria Hospital                 | Belfast, Northern Ireland                | Collaborator                                            |                                                                                            |
| Cathy                             | Patterson     |                       |                  | Royal Victoria Hospital                 | Belfast, Northern Ireland                | Collaborator                                            |                                                                                            |

## Supplemental Online Content: Nonauthor Collaborators

\*Indicates required information. Only first name, last name, and suffix will appear in PubMed.

| *First Name and Middle Initial(s) | *Last Name    | *Suffix (eg, Jr, III) | Academic Degrees | Institution                                     | Location (city, state/province, country) | Role or Contribution, eg, chair, principal investigator | Group (if more than 1 Group listed in the byline and/or Subgroup (eg, Steering Committee)) |
|-----------------------------------|---------------|-----------------------|------------------|-------------------------------------------------|------------------------------------------|---------------------------------------------------------|--------------------------------------------------------------------------------------------|
| Karen                             | Adams         |                       |                  | Royal Victoria Hospital                         | Belfast, Northern Ireland                | Collaborator                                            |                                                                                            |
| Brian                             | Wells         |                       |                  | Royal Victoria Hospital                         | Belfast, Northern Ireland                | Collaborator                                            |                                                                                            |
| Margaret                          | McFarland     |                       |                  | Royal Victoria Hospital                         | Belfast, Northern Ireland                | Collaborator                                            |                                                                                            |
|                                   |               |                       |                  |                                                 |                                          |                                                         |                                                                                            |
| Tiago                             | Moreira       |                       | MD, PhD          | Department of Clinical Neuroscience, Karolinska | Stockholm, Sweden                        | Collaborator                                            |                                                                                            |
| Christina                         | Sjöstrand     |                       | MD, PhD          | Department of Clinical Neuroscience, Karolinska | Stockholm, Sweden                        | Collaborator                                            |                                                                                            |
| Michael                           | Mazya         |                       | MD, PhD          | Department of Clinical Neuroscience, Karolinska | Stockholm, Sweden                        | Collaborator                                            |                                                                                            |
| Håkan                             | Almqvist      |                       | MD               | Department of Clinical Neuroscience, Karolinska | Stockholm, Sweden                        | Collaborator                                            |                                                                                            |
| Nils                              | Wahlgren      |                       | MD, PhD          | Department of Clinical Neuroscience, Karolinska | Stockholm, Sweden                        | Collaborator                                            |                                                                                            |
| Anna                              | Steinberg     |                       | MD, PhD          | Department of Clinical Neuroscience, Karolinska | Stockholm, Sweden                        | Collaborator                                            |                                                                                            |
| Charith                           | Cooray        |                       | MD, PhD          | Department of Clinical Neuroscience, Karolinska | Stockholm, Sweden                        | Collaborator                                            |                                                                                            |
| Einar                             | Eriksson      |                       | MD, PhD          | Department of Clinical Neuroscience, Karolinska | Stockholm, Sweden                        | Collaborator                                            |                                                                                            |
| Magnus                            | Thorén        |                       | MD, PhD          | Department of Clinical Neuroscience, Karolinska | Stockholm, Sweden                        | Collaborator                                            |                                                                                            |
| Boris                             | Keselman      |                       | MD, PhD          | Department of Clinical Neuroscience, Karolinska | Stockholm, Sweden                        | Collaborator                                            |                                                                                            |
| Niaz                              | Ahmed         |                       | MD, PhD          | Department of Clinical Neuroscience, Karolinska | Stockholm, Sweden                        | Collaborator                                            |                                                                                            |
| Åke                               | Holmberg      |                       |                  | Department of Clinical Neuroscience, Karolinska | Stockholm, Sweden                        | Collaborator                                            |                                                                                            |
| Maria C.                          | Axelsson      |                       |                  | Department of Clinical Neuroscience, Karolinska | Stockholm, Sweden                        | Collaborator                                            |                                                                                            |
| Annika                            | Berglund      |                       | PhD              | Department of Clinical Neuroscience, Karolinska | Stockholm, Sweden                        | Collaborator                                            |                                                                                            |
|                                   |               |                       |                  |                                                 |                                          |                                                         |                                                                                            |
| Amir                              | Golsari       |                       | MD               | University Medical Center Hamburg-Eppendorf     | Hamburg, Germany                         | Collaborator                                            |                                                                                            |
| Julia                             | Hoppe         |                       | MD               | University Medical Center Hamburg-Eppendorf     | Hamburg, Germany                         | Collaborator                                            |                                                                                            |
| Milani                            | Deb-Chatterji |                       | MD               | University Medical Center Hamburg-Eppendorf     | Hamburg, Germany                         | Collaborator                                            |                                                                                            |
| Bastian                           | Cheng         |                       | MD               | University Medical Center Hamburg-Eppendorf     | Hamburg, Germany                         | Collaborator                                            |                                                                                            |
| Ewgenia                           | Barow         |                       | MD               | University Medical Center Hamburg-Eppendorf     | Hamburg, Germany                         | Collaborator                                            |                                                                                            |
| Eckhard                           | Schlemm       |                       | MD               | University Medical Center Hamburg-Eppendorf     | Hamburg, Germany                         | Collaborator                                            |                                                                                            |
| Iris                              | Lettow        |                       | MD               | University Medical Center Hamburg-Eppendorf     | Hamburg, Germany                         | Collaborator                                            |                                                                                            |
| Märit                             | Jensen        |                       | MD               | University Medical Center Hamburg-Eppendorf     | Hamburg, Germany                         | Collaborator                                            |                                                                                            |
| Dagmar                            | Otto          |                       |                  | University Medical Center Hamburg-Eppendorf     | Hamburg, Germany                         | Collaborator                                            |                                                                                            |
| Kirsten                           | Jaramillo     |                       |                  | University Medical Center Hamburg-Eppendorf     | Hamburg, Germany                         | Collaborator                                            |                                                                                            |
| Hannes                            | Appelbohm     |                       |                  | University Medical Center Hamburg-Eppendorf     | Hamburg, Germany                         | Collaborator                                            |                                                                                            |
| Jens                              | Fiehler       |                       | MD               | University Medical Center Hamburg-Eppendorf     | Hamburg, Germany                         | Collaborator                                            |                                                                                            |
| Maxim                             | Bester        |                       | MD               | University Medical Center Hamburg-Eppendorf     | Hamburg, Germany                         | Collaborator                                            |                                                                                            |
| Michael                           | Schönfeld     |                       | MD               | University Medical Center Hamburg-Eppendorf     | Hamburg, Germany                         | Collaborator                                            |                                                                                            |

## Supplemental Online Content: Nonauthor Collaborators

\*Indicates required information. Only first name, last name, and suffix will appear in PubMed.

| *First Name and Middle Initial(s) | *Last Name     | *Suffix (eg, Jr, III) | Academic Degrees | Institution                                     | Location (city, state/province, country) | Role or Contribution, eg, chair, principal investigator | Group (if more than 1 Group listed in the byline and/or Subgroup (eg, Steering Committee)) |
|-----------------------------------|----------------|-----------------------|------------------|-------------------------------------------------|------------------------------------------|---------------------------------------------------------|--------------------------------------------------------------------------------------------|
| Caspar                            | Brekenfeld     |                       | MD               | University Medical Center Hamburg-Eppendorf     | Hamburg, Germany                         | Collaborator                                            |                                                                                            |
| Brigette                          | Holst          |                       | MD               | University Medical Center Hamburg-Eppendorf     | Hamburg, Germany                         | Collaborator                                            |                                                                                            |
| Ginette                           | Wortmann       |                       |                  | University Medical Center Hamburg-Eppendorf     | Hamburg, Germany                         | Collaborator                                            |                                                                                            |
| Friederike                        | Koch           |                       |                  | University Medical Center Hamburg-Eppendorf     | Hamburg, Germany                         | Collaborator                                            |                                                                                            |
| Johannes C.                       | Gerber         |                       | MD               | University Hospital Carl Gustav Carus at the Te | Dresden, Germany                         | Collaborator                                            |                                                                                            |
| Andrij                            | Abramyuk       |                       | MD               | University Hospital Carl Gustav Carus at the Te | Dresden, Germany                         | Collaborator                                            |                                                                                            |
| Daniel                            | Kaiser         |                       | MD               | University Hospital Carl Gustav Carus at the Te | Dresden, Germany                         | Collaborator                                            |                                                                                            |
| Simon                             | Winzer         |                       | MD               | University Hospital Carl Gustav Carus at the Te | Dresden, Germany                         | Collaborator                                            |                                                                                            |
| Alexandra                         | Prakapenia     |                       | MD               | University Hospital Carl Gustav Carus at the Te | Dresden, Germany                         | Collaborator                                            |                                                                                            |
| Lars-Peder                        | Pallesen       |                       | MD               | University Hospital Carl Gustav Carus at the Te | Dresden, Germany                         | Collaborator                                            |                                                                                            |
| Timo                              | Siepmann       |                       | MD               | University Hospital Carl Gustav Carus at the Te | Dresden, Germany                         | Collaborator                                            |                                                                                            |
| Kristian                          | Barlinn        |                       | MD               | University Hospital Carl Gustav Carus at the Te | Dresden, Germany                         | Collaborator                                            |                                                                                            |
| Kathrin                           | Haase          |                       | RN               | University Hospital Carl Gustav Carus at the Te | Dresden, Germany                         | Collaborator                                            |                                                                                            |
| Angela                            | Sauer          |                       | RN               | University Hospital Carl Gustav Carus at the Te | Dresden, Germany                         | Collaborator                                            |                                                                                            |
| Marios-Nikos                      | Psychogios     |                       | MD               | University Medical Center Göttingen             | Göttingen, Germany                       | Site PI                                                 |                                                                                            |
| Jan                               | Liman          |                       | MD               | University Medical Center Göttingen             | Göttingen, Germany                       | Collaborator                                            |                                                                                            |
| Alex                              | Brehm          |                       | MD               | University Medical Center Göttingen             | Göttingen, Germany                       | Collaborator                                            |                                                                                            |
| Volker                            | Maus           |                       | MD               | University Medical Center Göttingen             | Göttingen, Germany                       | Collaborator                                            |                                                                                            |
| Nicole                            | Hollstein      |                       |                  | University Medical Center Göttingen             | Göttingen, Germany                       | Collaborator                                            |                                                                                            |
| Annika                            | Reinke         |                       |                  | University Medical Center Göttingen             | Göttingen, Germany                       | Collaborator                                            |                                                                                            |
| Gustav                            | Neitz          |                       |                  | University Medical Center Göttingen             | Göttingen, Germany                       | Collaborator                                            |                                                                                            |
| Marlena                           | Schnieder      |                       | MD               | University Medical Center Göttingen             | Göttingen, Germany                       | Collaborator                                            |                                                                                            |
| Margret                           | Schwarz        |                       |                  | University Medical Center Göttingen             | Göttingen, Germany                       | Collaborator                                            |                                                                                            |
| Allam                             | Ibrahim        |                       | MD               | University Medical Center Göttingen             | Göttingen, Germany                       | Collaborator                                            |                                                                                            |
| Julia                             | Müller         |                       |                  | University Medical Center Göttingen             | Göttingen, Germany                       | Collaborator                                            |                                                                                            |
| Stefanie                          | Meister        |                       |                  | University Medical Center Göttingen             | Göttingen, Germany                       | Collaborator                                            |                                                                                            |
| Berit                             | Bäumle         |                       |                  | University Medical Center Göttingen             | Göttingen, Germany                       | Collaborator                                            |                                                                                            |
| René                              | Chapot         |                       | MD               | Alfred Krupp Krankenhaus Hospital, Departme     | Essen, Germany                           | Site PI                                                 |                                                                                            |
| Sara                              | Pilgram-Pastor |                       | MD               | Alfred Krupp Krankenhaus Hospital, Departme     | Essen, Germany                           | Collaborator                                            |                                                                                            |
| Marta                             | Wallocha       |                       | MD               | Alfred Krupp Krankenhaus Hospital, Departme     | Essen, Germany                           | Collaborator                                            |                                                                                            |
| Michael                           | Stauder        |                       | MD               | Alfred Krupp Krankenhaus Hospital, Departme     | Essen, Germany                           | Collaborator                                            |                                                                                            |
| Ekin                              | Celik          |                       | MD               | Alfred Krupp Krankenhaus Hospital, Departme     | Essen, Germany                           | Collaborator                                            |                                                                                            |
| Paul                              | Stracke        |                       | MD               | Alfred Krupp Krankenhaus Hospital, Departme     | Essen, Germany                           | Collaborator                                            |                                                                                            |

## Supplemental Online Content: Nonauthor Collaborators

\*Indicates required information. Only first name, last name, and suffix will appear in PubMed.

| *First Name and Middle Initial(s) | *Last Name      | *Suffix (eg, Jr, III) | Academic Degrees | Institution                                   | Location (city, state/province, country) | Role or Contribution, eg, chair, principal investigator | Group (if more than 1 Group listed in the byline) and/or Subgroup (eg, Steering Committee) |
|-----------------------------------|-----------------|-----------------------|------------------|-----------------------------------------------|------------------------------------------|---------------------------------------------------------|--------------------------------------------------------------------------------------------|
| Nicole                            | Müller          |                       |                  | Alfred Krupp Krankenhaus Hospital, Department | Essen, Germany                           | Collaborator                                            |                                                                                            |
| Ralph                             | Weber           |                       | MD               | Alfred Krupp Krankenhaus Hospital, Department | Essen, Germany                           | Collaborator                                            |                                                                                            |
| R.                                | Veltkamp        |                       | MD               | Alfred Krupp Krankenhaus Hospital, Department | Essen, Germany                           | Collaborator                                            |                                                                                            |
|                                   |                 |                       |                  |                                               |                                          |                                                         |                                                                                            |
| Simon                             | Nagel           |                       | MD               | University Hospital Heidelberg                | Heidelberg, Germany                      | Site PI                                                 |                                                                                            |
| Peter Arthur                      | Ringleb         |                       | MD               | University Hospital Heidelberg                | Heidelberg, Germany                      | Collaborator                                            |                                                                                            |
| Miriam                            | Heyse           |                       | MD               | University Hospital Heidelberg                | Heidelberg, Germany                      | Collaborator                                            |                                                                                            |
| Hemasse                           | Amiri           |                       | MD               | University Hospital Heidelberg                | Heidelberg, Germany                      | Collaborator                                            |                                                                                            |
| Sibu                              | Mundiyanapurath |                       | MD               | University Hospital Heidelberg                | Heidelberg, Germany                      | Collaborator                                            |                                                                                            |
| Min                               | Chen            |                       | MD               | University Hospital Heidelberg                | Heidelberg, Germany                      | Collaborator                                            |                                                                                            |
| Elisabeth                         | Beyrle          |                       |                  | University Hospital Heidelberg                | Heidelberg, Germany                      | Collaborator                                            |                                                                                            |
| Perdita                           | Beck            |                       |                  | University Hospital Heidelberg                | Heidelberg, Germany                      | Collaborator                                            |                                                                                            |
| Markus Alfred                     | Möhlenbruch     |                       | MD               | University Hospital Heidelberg                | Heidelberg, Germany                      | Collaborator                                            |                                                                                            |
